# Supplementary material for: Facile construction of pyrrolo[1,2-b]isoquinolin-10(5H)-ones via a redox-amination–aromatization–Friedel–Crafts acylation cascade reaction and discovery of novel topoisomerase inhibitors
Source: Royal Society of Chemistry journal article supplement (doi:10.1039/c6cc03071h), 2016-01-01
Supplement: c6cc03071h1.pdf [file c6cc03071h1.pdf]

## ***Supporting Information***

### **Facile construction of pyrrolo[1,2-*b*]isoquinolin-10(5*H*)-ones via a redox-amination-aromatization-Friedel-Crafts acylation cascade reaction and discovery of novel topoisomerase inhibitors**

Shanchao Wu,<sup>†,§</sup> Na Liu,<sup>†,§</sup> Guoqiang Dong,<sup>†,§</sup> Lin Ma,<sup>†</sup> Shengzheng Wang,<sup>†</sup> Wencai Shi,<sup>§</sup> Kun Fang,<sup>†,≠</sup> Shuqiang Chen<sup>†</sup>, Jian Li,<sup>≠</sup> Wannian Zhang,<sup>†,\*</sup> Chunquan Sheng<sup>†,\*</sup>  
and Wei Wang<sup>†,≠,\*</sup>

#### **Table of contents**

|                                                                                                       |            |
|-------------------------------------------------------------------------------------------------------|------------|
| 1. General Information                                                                                | <b>S2</b>  |
| 2. General procedure for the preparation of substrates <b>2c-e</b>                                    | <b>S2</b>  |
| 3. General procedure for the preparation of substrates <b>2g-i</b>                                    | <b>S4</b>  |
| 4. General procedure for the preparation of substrates <b>2j-t</b>                                    | <b>S5</b>  |
| 5. General procedure for the preparation of compounds <b>3a-f</b>                                     | <b>S11</b> |
| 6. General procedure for the preparation of compounds <b>3g-t</b>                                     | <b>S13</b> |
| 7. Further exploration of optimized reaction condition of diphenyl<br>substituted substrate <b>2g</b> | <b>S20</b> |
| 8. X-ray structure of <b>3j</b>                                                                       | <b>S21</b> |
| 9. NMR Spectra                                                                                        | <b>S30</b> |
| 10. Top1 and Top2 Inhibitory Activity Assay                                                           | <b>S66</b> |
| 11. Biological assays                                                                                 | <b>S67</b> |
| 12. References                                                                                        | <b>S68</b> |

**General Information:** All starting materials are commercially available and analytical pure. Microwave reactions were carried out in a Biotage (initiator-type) reactor.  $^1\text{H}$  NMR and  $^{13}\text{C}$  NMR spectra were recorded on Bruker AVANCE II 300 or AVANCE II 600 Nuclear Magnetic Resonance spectrometer (Bruker Company, Germany), using TMS as an internal standard and  $\text{CDCl}_3$  or  $\text{DMSO}-d_6$  as solvents. Chemical shifts ( $\delta$  values) and coupling constants ( $J$  values) are given in ppm ( $\delta$ ) and Hz, respectively. The mass spectra were recorded on an Esquire 3000 LC-MS mass spectrometer. High resolution mass spectrometry (HRMS) was recorded on an Agilent 6538 UHD Accurate-Mass Q-TOF LC/MS spectrometer. Silica gel thin-layer chromatography was performed on precoated plates GF-254 (Qingdao Haiyang Chemical, China) and compounds were visualized with a UV light at 254 and 365 nm. Silica gel column chromatography was performed with Silica gel 60G (Qindao Haiyang Chemical, China). Structural determination of the products was determined by X-ray and NMR.

**General procedure for the preparation of substrates 2c-e.**

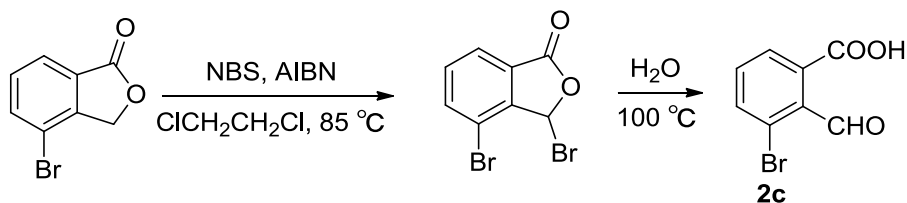

A mixture of 1,2-dichloroethane (25 mL), 4-bromoisobenzofuran-1(3H)-one (0.95 g, 4.5 mmol, 1.0 equiv), *N*-bromosuccinimide (0.89 g, 5.0 mmol, 1.1 equiv) and azobisisobutyronitrile (0.04 g, 0.2 mmol, 0.04 equiv) was refluxed for 1 h. The reaction mixture was kept in an ice bath for 2 h then filtered. The solvent was removed under reduced pressure. Water (10 mL) was added and the resulting mixture was refluxed for 1 h. The reaction mixture was cooled to room temperature and extracted with EtOAc. The combined organic phases were dried and concentrated under reduced pressure to give compound **2c** as a white solid (0.78 g, 76.2% yield). The synthetic method for substrates **2a** and **2d-e** were similar to the synthesis of substrate **2c**. Substrates **2b** and **2f** are commercially available.

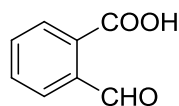

**2-Formylbenzoic acid (2a):** White solid (0.55g), yield: 82.1%.  $^1\text{H}$  NMR (300 MHz, DMSO- $d_6$ , TMS):  $\delta$  = 8.18 (s, 1H), 7.77-7.85 (m, 2H), 7.64-7.69 (m, 2H), 6.67 (s, 1H);  $^{13}\text{C}$  NMR (75 MHz, DMSO- $d_6$ , TMS):  $\delta$  = 168.92, 147.90, 134.97, 130.98, 127.04, 124.98, 124.19, 98.76; HRMS (ESI) calcd for  $\text{C}_8\text{H}_5\text{O}_3$   $[\text{M}-\text{H}]^-$  = 149.0244, found 149.0243.

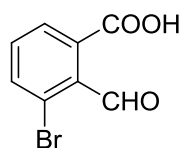

**3-Bromo-2-formylbenzoic acid (2c):** White solid (0.78 g), yield: 76.2%.  $^1\text{H}$  NMR (300 MHz, DMSO- $d_6$ , TMS):  $\delta$  = 8.28 (d,  $J$  = 8.6 Hz, 1H), 7.99 (d,  $J$  = 7.8 Hz, 1H), 7.85 (d,  $J$  = 7.4 Hz, 1H), 6.61 (d,  $J$  = 8.6 Hz, 1H);  $^{13}\text{C}$  NMR (75 MHz, DMSO- $d_6$ , TMS):  $\delta$  = 168.38, 147.05, 138.94, 133.75, 129.95, 125.03, 118.41, 99.23; HRMS (ESI) calcd for  $\text{C}_8\text{H}_4\text{BrO}_3$   $[\text{M}-\text{H}]^-$  = 226.9349, found 226.9350.

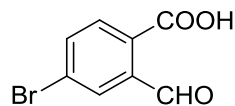

**4-Bromo-2-formylbenzoic acid (2d):** White solid (0.68 g), yield: 56.3%.  $^1\text{H}$  NMR (300 MHz, DMSO- $d_6$ , TMS):  $\delta$  = 7.90-7.91 (m, 1H), 7.84 (dd,  $J$  = 1.5, 8.1 Hz, 1H), 7.50 (d,  $J$  = 8.1 Hz, 1H), 7.63 (d,  $J$  = 8.0 Hz, 1H), 6.63 (s, 1H);  $^{13}\text{C}$  NMR (75 MHz, DMSO- $d_6$ , TMS):  $\delta$  = 168.38, 147.05, 138.94, 133.75, 129.95, 125.03, 118.41, 99.23; HRMS (ESI) calcd for  $\text{C}_8\text{H}_4\text{BrO}_3$   $[\text{M}-\text{H}]^-$  = 226.9349, found 226.9348.

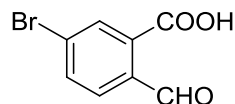

**5-Bromo-2-formylbenzoic acid (2e):** White solid (0.65 g), yield: 63.4%.  $^1\text{H}$  NMR (600 MHz, DMSO- $d_6$ , TMS):  $\delta$  = 8.27 (dd,  $J$  = 4.1 Hz, 1H), 7.96-8.00 (m, 2H), 7.63 (d,  $J$  = 7.7 Hz, 2H), 6.65 (d,  $J$  = 4.6 Hz, 1H);  $^{13}\text{C}$  NMR (75 MHz, DMSO- $d_6$ , TMS):  $\delta$  = 167.57, 149.41, 133.74, 128.45, 126.97, 126.42, 125.81, 97.66; HRMS (ESI) calcd

for  $\text{C}_8\text{H}_4\text{BrO}_3$   $[\text{M}-\text{H}]^- = 226.9349$ , found 226.9349.

### General procedure for the preparation of substrates **2g-i**.

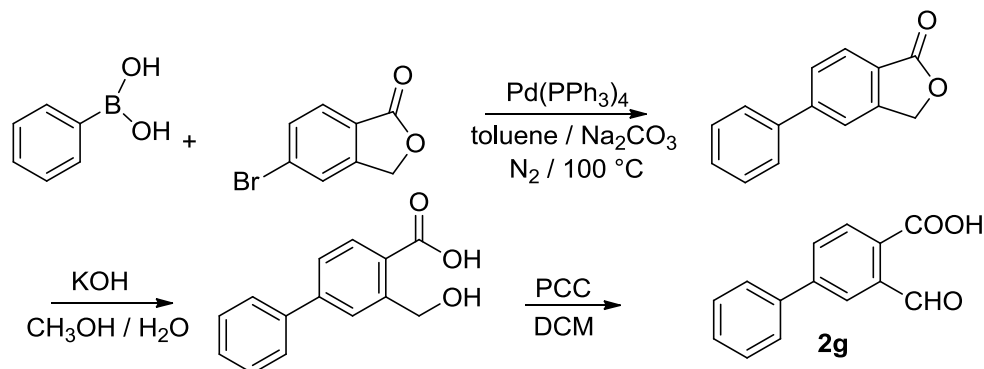

Phenylboronic acid (1.9 g, 15 mmol, 1.5 equiv), 5-bromoisobenzofuran-1(3H)-one (2.3 g, 10 mmol, 1.0 equiv) and tetrakis(triphenylphosphine)palladium(0) ( $\text{Pd}(\text{PPh}_3)_4$ ) (1.0 g, 0.8 mmol, 0.08 equiv) were added to a mixed solvent of toluene (20 mL) and 2 M  $\text{Na}_2\text{CO}_3$  solution (16 mL). The resulted solution was stirred at  $100\text{ }^\circ\text{C}$  for 3 h under nitrogen atmosphere. Then the reaction mixture was extracted with EtOAc ( $3 \times 30$  mL). The combined EtOAc layer was washed with brine, dried over anhydrous  $\text{Na}_2\text{SO}_4$  and concentrated under reduced pressure. The crude product was purified by column chromatography (silica gel, petroleum ether/EtOAc = 8:1, v/v) afforded 5-phenylisobenzofuran-1(3H)-one (2.0 g, 63.5% yield) as white solid.

5-Phenylisobenzofuran-1(3H)-one (1.5 g, 7.1 mmol, 1.0 equiv) and KOH (0.6 g, 11 mmol, 1.5 equiv) were added to the mixed solvent of methanol (17 mL) and water (3 mL) (methanol/water = 85:15, v/v). The resulted solution was stirred at  $50\text{ }^\circ\text{C}$  for 2 h, and the pH value was adjusted to 4 by saturated  $\text{KHSO}_4$  aqueous solution. After filtration, product **2g** was dried at  $50\text{ }^\circ\text{C}$  as a white solid (1.62 g, 80.2% yield).

3-(Hydroxymethyl)-[1,1'-biphenyl]-4-carboxylic acid (0.60 g, 2.6 mmol, 1.0 equiv) was dissolved into dichloromethane (8 mL), pyridinium chlorochromate (PCC) (1.1 g, 5.2 mmol, 2.0 equiv) was added, and the solution was stirred for 2 h at room temperature. Then, the solvent was evaporated under reduced pressure. The residue was purified by silica gel column chromatography (petroleum ether/EtOAc = 4: 1-1:1, v/v) to give the substrate **2g** (0.13 g, yield: 21.9%) as a white solid.

The synthetic method for substrates **2h** and **2i** was similar to the synthesis of

substrate **2g**. Substrate **2h** was obtained as crude compound by a simple purification procedure through flash column chromatography on silica gel.

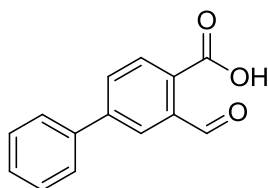

**3-Formyl-[1,1'-biphenyl]-4-carboxylic acid (2g):** White solid (0.13 g), yield: 21.9%.  $^1\text{H}$  NMR (600 MHz,  $\text{CDCl}_3$ , TMS):  $\delta$  = 7.97 (d,  $J$  = 7.6 Hz, 1H), 7.86 (d,  $J$  = 6.9 Hz, 2H), 7.66 (d,  $J$  = 7.6 Hz, 2H), 7.53 (t,  $J$  = 7.1 Hz, 2H), 7.47-7.49 (m, 1H), 6.71 (s, 1H);  $^{13}\text{C}$  NMR (150 MHz,  $\text{CDCl}_3$ , TMS):  $\delta$  = 168.45, 148.17, 147.07, 139.37, 130.20, 129.17, 128.82, 127.52, 125.88, 125.55, 121.92, 97.23; HRMS (ESI) calcd for  $\text{C}_{14}\text{H}_9\text{O}_3$   $[\text{M}-\text{H}]^-$  = 225.0553, found 225.0552.

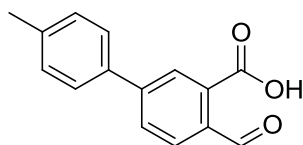

**4-Formyl-4'-methyl-[1,1'-biphenyl]-3-carboxylic acid (2i):** White solid (0.82 g), yield: 13.2 %.  $^1\text{H}$  NMR (300 MHz,  $\text{CDCl}_3$ , TMS):  $\delta$  = 8.09 (d,  $J$  = 1.0 Hz, 1H), 7.96 (dd,  $J$  = 1.6, 7.9 Hz, 2H), 7.71 (d,  $J$  = 7.8 Hz, 1H), 7.54 (d,  $J$  = 8.1 Hz, 2H), 7.32-7.35 (m, 2H), 6.70 (s, 1H), 2.45 (s, 3H);  $^{13}\text{C}$  NMR (75 MHz,  $\text{CDCl}_3$ , TMS):  $\delta$  = 168.64, 144.60, 144.55, 138.48, 136.26, 133.47, 129.87, 127.68, 127.14, 123.66, 123.51, 97.36, 29.70; HRMS (ESI) calcd for  $\text{C}_{15}\text{H}_{11}\text{O}_3$   $[\text{M}-\text{H}]^-$  = 239.0714, found 239.0715.

#### General procedure for the preparation of substrates 2j-t

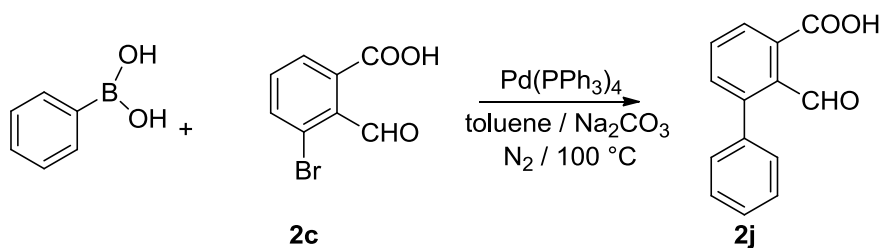

Phenylboronic acid (0.26 g, 2.1 mmol, 1.2 equiv), 3-bromo-2-formylbenzoic acid **2c** (0.4g, 1.7 mmol, 1.0 equiv) and  $\text{Pd(PPh}_3)_4$  (0.18g, 0.14 mmol, 0.08 equiv) were added to the mixed solvent of toluene (4.8 mL) and 2 M  $\text{Na}_2\text{CO}_3$  solution (6.0 mL). The resulted solution was stirred at 100 °C for 3 h under nitrogen atmosphere. Then the reaction mixture was extracted with EtOAc ( $3 \times 30$  mL). The combined EtOAc layer was washed with brine, dried over anhydrous  $\text{Na}_2\text{SO}_4$  and concentrated under reduced pressure. The crude product was purified by column chromatography (silica gel, petroleum ether/EtOAc = 8:1, v/v) afforded 2-formyl-[1,1'-biphenyl]-3-carboxylic acid **2j** (0.48 g, 47.1% yield) as a white solid. The synthetic method for substrates **2k-t** were similar to the synthesis of substrate **2j**.

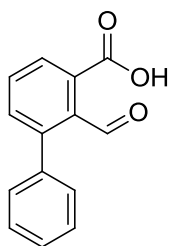

**2-Formyl-[1,1'-biphenyl]-3-carboxylic acid (2j):** White solid (0.18 g), yield: 47.1%.  $^1\text{H}$  NMR (300 MHz,  $\text{DMSO-}d_6$ , TMS):  $\delta$  = 7.91 (d,  $J$  = 8.2 Hz, 1H), 7.82 (dd,  $J$  = 0.9, 7.4 Hz, 1H), 7.80 (1.0, 7.6 Hz, 1H), 7.73 (t,  $J$  = 7.5 Hz, 1H), 7.63-7.65 (m, 2H), 7.46-7.49 (m, 2H), 7.40-7.42 (m, 1H), 7.04 (d,  $J$  = 8.1 Hz, 1H);  $^{13}\text{C}$  NMR (75 MHz,  $\text{DMSO-}d_6$ , TMS):  $\delta$  = 168.48, 144.41, 138.04, 137.36, 134.90, 131.16, 128.61, 128.48, 127.98, 127.33, 123.54, 98.26; HRMS (ESI) calcd for  $\text{C}_{14}\text{H}_9\text{O}_3$   $[\text{M-H}]^-$  = 225.0557, found 225.0559.

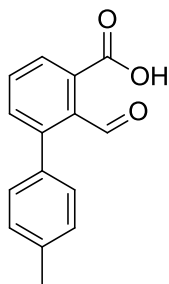

**2-Formyl-4'-methyl-[1,1'-biphenyl]-3-carboxylic acid (2k):** White solid (0.24 g), yield: 59.5%.  $^1\text{H}$  NMR (300 MHz,  $\text{DMSO-}d_6$ , TMS):  $\delta$  = 7.92 (s, 1H), 7.71-7.83 (m,

3H), 7.56 (d,  $J = 7.9$  Hz, 2H), 7.31 (d,  $J = 7.9$  Hz, 2H), 7.06 (s, 1H), 2.38 (s, 3H);  $^{13}\text{C}$  NMR (75 MHz,  $\text{DMSO}-d_6$ , TMS):  $\delta = 169.85, 145.59, 139.32, 138.70, 136.03, 135.76, 132.43, 130.52, 129.67, 128.61, 124.59, 99.65, 22.02$ ; HRMS (ESI) calcd for  $\text{C}_{15}\text{H}_{11}\text{O}_3$   $[\text{M}-\text{H}]^- = 239.0714$ , found 239.0715.

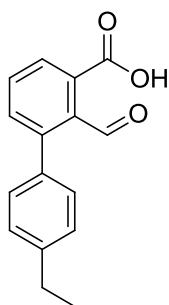

**4'-Ethyl-2-formyl-[1,1'-biphenyl]-3-carboxylic acid (2l):** White solid (0.11 g), yield: 26.1%.  $^1\text{H}$  NMR (300 MHz,  $\text{CDCl}_3$ , TMS):  $\delta = 7.88$  (dd,  $J = 1.3, 6.9$  Hz, 1H), 7.65-7.74 (m, 2H), 7.49 (d,  $J = 8.1$  Hz, 2H), 7.33 (d,  $J = 8.2$  Hz, 2H), 6.85 (d,  $J = 7.4$  Hz, 1H), 2.74 (q,  $J = 7.6$  Hz, 2H), 1.31 (t,  $J = 7.6$  Hz, 3H);  $^{13}\text{C}$  NMR (75 MHz,  $\text{CDCl}_3$ , TMS):  $\delta = 168.70, 144.65, 143.20, 139.04, 135.28, 134.54, 131.43, 128.52, 128.37, 127.39, 124.18, 97.14, 28.57, 12.38$ ; HRMS (ESI) calcd for  $\text{C}_{16}\text{H}_{13}\text{O}_3$   $[\text{M}-\text{H}]^- = 253.0870$ , found 253.0870.

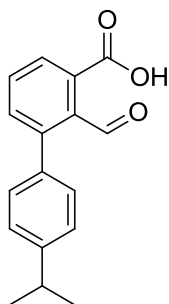

**2-Formyl-4'-isopropyl-[1,1'-biphenyl]-3-carboxylic acid (2m):** Yellow solid (0.31 g), yield: 60.3%.  $^1\text{H}$  NMR (600 MHz,  $\text{CDCl}_3$ , TMS):  $\delta = 7.88$  (d,  $J = 7.4$  Hz, 1H), 7.74 (dd,  $J = 0.8, 7.6$  Hz, 1H), 7.69 (t,  $J = 7.6$  Hz, 1H), 7.53 (d,  $J = 8.1$  Hz, 2H), 7.38 (d,  $J = 8.1$  Hz, 2H), 6.87 (s, 1H), 2.99-3.04 (m, 1H), 1.34 (d,  $J = 6.9$  Hz, 6H);  $^{13}\text{C}$  NMR (150 MHz,  $\text{CDCl}_3$ , TMS):  $\delta = 168.86, 149.20, 143.25, 139.04, 135.29, 134.65, 131.37, 128.54, 127.37, 126.93, 124.13, 97.28, 33.85, 23.89$ ; HRMS (ESI) calcd for

$C_{17}H_{15}O_3$   $[M-H]^- = 267.1027$ , found 267.1029.

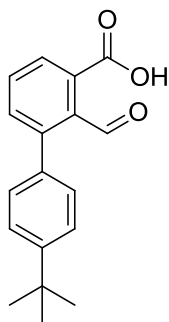

**4'-(*Tert*-butyl)-2-formyl-[1,1'-biphenyl]-3-carboxylic acid (2n):** Yellow oil (0.33 g), yield: 62%.  $^1H$  NMR (600 MHz,  $CDCl_3$ , TMS):  $\delta$  = 7.87 (d,  $J$  = 7.4 Hz, 1H), 7.74 (d,  $J$  = 7.4 Hz, 2H), 7.68 (t,  $J$  = 7.8 Hz, 1H), 7.53 (s, 4H), 7.50 (d,  $J$  = 8.2 Hz, 2H), 1.41 (s, 9H);  $^{13}C$  NMR (75 MHz,  $DMSO-d_6$ , TMS):  $\delta$  = 170.80, 169.03, 150.87, 144.77, 138.42, 135.34, 134.97, 131.62, 128.69, 127.80, 125.92, 123.80, 98.77, 60.22, 34.81; HRMS (ESI) calcd for  $C_{18}H_{17}O_3$   $[M-H]^- = 281.1183$ , found 281.1182.

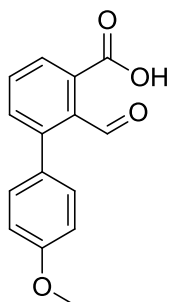

**2-Formyl-4'-methoxy-[1,1'-biphenyl]-3-carboxylic acid (2o):** White solid (0.11 g), yield: 25.3%.  $^1H$  NMR (300 MHz,  $CDCl_3$ , TMS):  $\delta$  = 7.80 (dd,  $J$  = 1.3, 7.3 Hz, 1H), 7.59-7.69 (m, 2H), 7.47-7.52 (m, 2H), 7.09-7.18 (m, 1H), 6.96-7.01 (m, 2H), 6.80 (s, 1H), 3.84 (s, 3H); HRMS (ESI) calcd for  $C_{15}H_{12}NaO_4$   $[M+Na]^+ = 279.0628$ , found 279.0629.



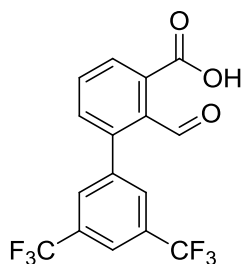

**2-Formyl-3',5'-bis(trifluoromethyl)-[1,1'-biphenyl]-3-carboxylic acid (2p):** White solid (0.18 g), yield: 28.7%.  $^1\text{H}$  NMR (300 MHz,  $\text{CD}_3\text{OD}$ , TMS):  $\delta$  = 8.38 (s, 2H), 8.21 (s, 1H), 8.14 (s, 1H), 7.95-8.02 (m, 2H), 7.83 (t,  $J$  = 7.6 Hz, 1H), 7.09 (s, 1H);  $^{13}\text{C}$  NMR (75 MHz,  $\text{CD}_3\text{OD}$ , TMS):  $\delta$  = 169.43, 146.19, 141.16, 136.80, 136.08, 132.75, 132.10, 131.67, 130.82, 128.73, 126.35, 99.47; HRMS (ESI) calcd for  $\text{C}_{16}\text{H}_7\text{F}_6\text{O}_3$   $[\text{M}-\text{H}]^-$  = 361.0305, found 361.0307.

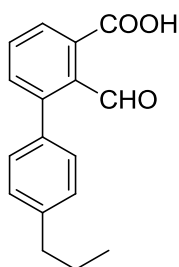

**2-Formyl-4'-propyl-[1,1'-biphenyl]-3-carboxylic acid (2q):** White solid (0.10 g), yield: 22.4%.  $^1\text{H}$  NMR (600 MHz,  $\text{CDCl}_3$ , TMS):  $\delta$  = 7.85 (dd,  $J$  = 1.0, 7.5 Hz, 1H), 7.69 (dd,  $J$  = 1.0, 7.6 Hz, 1H), 7.65 (t,  $J$  = 7.5 Hz, 1H), 7.45 (dt,  $J$  = 2.0, 4.0, 8.3 Hz, 2H), 7.28 (d,  $J$  = 8.3 Hz, 2H), 6.82 (d,  $J$  = 3.6 Hz, 1H), 2.64 (t,  $J$  = 7.6 Hz, 2H), 1.65-1.72 (m, 2H), 0.98 (t,  $J$  = 7.3 Hz, 3H);  $^{13}\text{C}$  NMR (150 MHz,  $\text{CDCl}_3$ , TMS):  $\delta$  = 168.68, 143.22, 139.08, 135.27, 134.56, 131.42, 128.96, 128.45, 127.41, 124.18, 97.14, 37.76, 29.71, 24.41, 13.90; HRMS (ESI) calcd for  $\text{C}_{17}\text{H}_{15}\text{O}_3$   $[\text{M}-\text{H}]^-$  = 267.1027, found 267.1028.

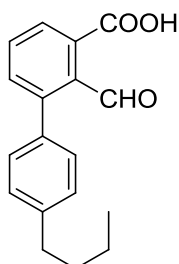

**4'-Butyl-2-formyl-[1,1'-biphenyl]-3-carboxylic acid (2r):** White solid (0.21 g), yield: 43.5%.  $^1\text{H}$  NMR (600 MHz,  $\text{CDCl}_3$ , TMS):  $\delta$  = 7.87 (s, 1H), 7.77 (t,  $J$  = 6.9 Hz, 2H), 7.69 (t,  $J$  = 7.6 Hz, 1H), 7.54 (d,  $J$  = 8.0 Hz, 2H), 7.27 (d,  $J$  = 8.0 Hz, 2H), 7.01 (s, 1H), 2.61 (t,  $J$  = 7.6 Hz, 2H), 1.54-1.60 (m, 2H), 1.29-1.35 (m, 2H), 0.89 (t,  $J$  = 7.4 Hz, 3H);  $^{13}\text{C}$  NMR (150 MHz,  $\text{CDCl}_3$ , TMS):  $\delta$  = 169.03, 144.78, 142.74, 138.53, 135.27, 135.19, 131.62, 129.04, 128.88, 127.83, 123.78, 98.81, 34.97, 33.48, 22.31; HRMS (ESI) calcd for  $\text{C}_{18}\text{H}_{17}\text{O}_3$   $[\text{M}-\text{H}]^-$  = 281.1183, found 281.1184.

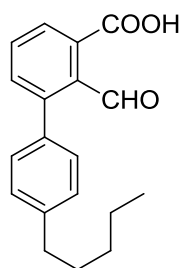

**2-Formyl-4'-pentyl-[1,1'-biphenyl]-3-carboxylic acid (2s):** White solid (0.26 g), yield: 52.5%.  $^1\text{H}$  NMR (600 MHz,  $\text{CDCl}_3$ , TMS):  $\delta$  = 7.86 (dd,  $J$  = 1.0, 7.4 Hz, 1H), 7.71 (dd,  $J$  = 1.0, 7.6 Hz, 1H), 7.66 (t,  $J$  = 7.5 Hz, 1H), 7.47 (dt,  $J$  = 2.0, 4.0, 8.3 Hz, 2H), 7.29 (dt,  $J$  = 2.0, 4.0, 8.3 Hz, 2H), 6.83 (d,  $J$  = 7.2 Hz, 1H), 3.76 (d,  $J$  = 7.7 Hz, 1H), 2.67 (t,  $J$  = 7.7 Hz, 2H), 1.65-1.69 (m, 2H), 1.35-1.39 (m, 4H), 0.91-0.94 (m, 3H);  $^{13}\text{C}$  NMR (150 MHz,  $\text{CDCl}_3$ , TMS):  $\delta$  = 168.23, 142.93, 142.74, 138.58, 134.77, 134.02, 130.91, 128.39, 127.97, 126.91, 123.66, 96.69, 35.16, 31.08, 30.53, 22.05, 13.53; HRMS (ESI) calcd for  $\text{C}_{19}\text{H}_{19}\text{O}_3$   $[\text{M}-\text{H}]^-$  = 295.1340, found 295.1342.

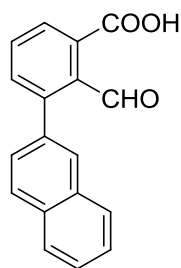

**2-Formyl-3-(naphthalen-2-yl)benzoic acid (2t):** Gray solid (0.10 g), yield: 22.4%.  $^1\text{H}$  NMR (600 MHz,  $\text{CDCl}_3$ , TMS):  $\delta$  = 8.03 (d,  $J$  = 1.5 Hz, 1H), 7.96 (d,  $J$  = 8.5 Hz, 1H), 7.89-7.93 (m, 3H), 7.82 (dd,  $J$  = 0.9, 7.5 Hz, 1H), 7.72 (t,  $J$  = 7.5 Hz, 1H), 7.65

(dd,  $J = 1.8, 8.4$  Hz, 1H), 7.54-7.57 (m, 2H), 6.89 (d,  $J = 6.3$  Hz, 1H), 3.69 (s, 1H);  $^{13}\text{C}$  NMR (150 MHz,  $\text{CDCl}_3$ , TMS):  $\delta = 168.05, 143.02, 138.56, 135.04, 134.19, 132.81, 132.43, 131.02, 128.09, 127.78, 127.48, 127.29, 127.06, 126.26, 125.71, 124.01, 96.57$ ; HRMS (ESI) calcd for  $\text{C}_{18}\text{H}_{11}\text{O}_3$   $[\text{M}-\text{H}]^- = 275.0714$ , found 275.0716.

### General procedure for the preparation of target compounds **3a-f**

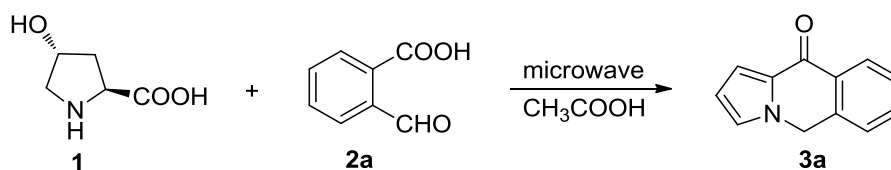

A 10 mL microwave reaction tube was charged with *trans*-4-hydroxy-*L*-proline **1** (0.16 g, 1.2 mmol, 1.2 equiv), 2-formylbenzoic acid **2a** (0.15 g, 1.0 mmol, 1.0 equiv), and  $\text{CH}_3\text{COOH}$  (2.0 mL). The reaction tube was sealed with a Teflon-lined snap cap and heated in the microwave reactor at 170 °C at very high absorption level for 20 min. After cooling, the crude reaction mixture was evaporated in vacuo and the crude product was purified by silica gel column chromatography (petroleum ether/EtOAc = 8: 1, v/v) to give **3a** (0.13 g, 71.7% yield) as a white solid. The synthetic method for compounds **3b-f** was similar to the synthesis of compound **3a**.

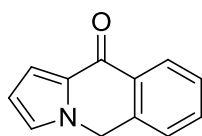

**Pyrrolo[1,2-*b*]isoquinolin-10(5*H*)-one (**3a**):**  $^1\text{H}$  NMR (600 MHz,  $\text{CDCl}_3$ , TMS):  $\delta = 8.18$  (d,  $J = 2.1$  Hz, 1H), 7.44 (dd,  $J = 2.0, 8.1$  Hz, 1H), 7.22 (d,  $J = 8.1$  Hz, 1H), 7.13-7.14 (m, 1H), 7.01-7.01 (m, 1H), 6.38 (dd,  $J = 2.5, 4.2$  Hz, 1H), 5.28 (s, 2H);  $^{13}\text{C}$  NMR (125 MHz,  $\text{CDCl}_3$ , TMS):  $\delta = 174.80, 135.60, 132.46, 130.69, 129.76, 127.99, 127.23, 125.68, 125.57, 113.77, 111.71, 46.98$ ; HRMS (ESI) calcd for  $\text{C}_{12}\text{H}_{10}\text{NO}$   $[\text{M}+\text{H}]^+ = 184.0758$ , found 184.0759.

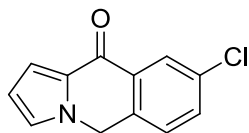

**8-Chloropyrrolo[1,2-*b*]isoquinolin-10(5*H*)-one (3b):**  $^1\text{H}$  NMR (600 MHz,  $\text{CDCl}_3$ , TMS):  $\delta$  = 8.27 (d,  $J$  = 2.2 Hz, 1H), 7.53 (dd,  $J$  = 2.3, 8.2 Hz, 1H), 7.30 (d,  $J$  = 8.2 Hz, 1H), 7.22 (dd,  $J$  = 1.3, 4.0 Hz, 1H), 7.10 (s, 1H), 6.46 (dd,  $J$  = 2.5, 4.0 Hz, 1H), 5.37 (s, 2H);  $^{13}\text{C}$  NMR (150 MHz,  $\text{CDCl}_3$ , TMS):  $\delta$  = 173.49, 134.55, 133.84, 132.61, 132.28, 129.40, 127.34, 127.21, 126.12, 114.46, 112.22, 46.77; HRMS (ESI) calcd for  $\text{C}_{12}\text{H}_9\text{ClNO}$   $[\text{M}+\text{H}]^+ = 218.0367$ , found 218.0369.

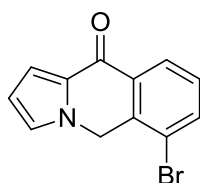

**6-Bromopyrrolo[1,2-*b*]isoquinolin-10(5*H*)-one (3c):**  $^1\text{H}$  NMR (600 MHz,  $\text{CDCl}_3$ , TMS):  $\delta$  = 8.35 (dd,  $J$  = 1.0, 7.6 Hz, 1H), 7.83 (dd,  $J$  = 1.0, 7.3 Hz, 1H), 7.43 (t,  $J$  = 8.0 Hz, 1H), 7.25 (dd,  $J$  = 1.4, 4.1 Hz, 1H), 7.20-7.21 (m, 1H), 6.52 (dd,  $J$  = 2.4, 4.1 Hz, 1H), 5.38 (s, 2H);  $^{13}\text{C}$  NMR (150 MHz,  $\text{CDCl}_3$ , TMS):  $\delta$  = 173.45, 136.30, 134.85, 132.87, 129.19, 128.58, 126.51, 125.17, 121.32, 114.12, 112.19, 48.27; HRMS (ESI) calcd for  $\text{C}_{12}\text{H}_9\text{BrNO}$   $[\text{M}+\text{H}]^+ = 261.9862$ , found 261.9863.

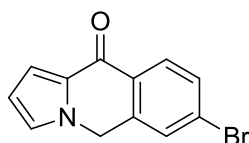

**7-Bromopyrrolo[1,2-*b*]isoquinolin-10(5*H*)-one (3d):**  $^1\text{H}$ -NMR (600 MHz,  $\text{CDCl}_3$ , TMS):  $\delta$  = 8.18 (d,  $J$  = 8.4 Hz, 1H), 7.63 (dd,  $J$  = 1.8, 8.4 Hz, 1H), 7.53 (s, 1H), 7.23 (dd,  $J$  = 1.4, 4.0 Hz, 1H), 7.10 (s, 1H), 6.47 (dd,  $J$  = 2.5, 4.0 Hz, 1H), 5.38 (s, 2H);  $^{13}\text{C}$  NMR (150 MHz,  $\text{CDCl}_3$ , TMS):  $\delta$  = 173.74, 139.23, 137.15, 131.44, 129.56, 128.90, 128.62, 127.39, 125.76, 114.18, 112.01, 46.45; HRMS (ESI) calcd for  $\text{C}_{12}\text{H}_9\text{BrNO}$   $[\text{M}+\text{H}]^+ = 261.9862$ , found 261.9863.

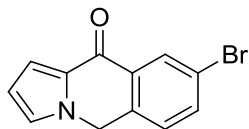

**8-Bromopyrrolo[1,2-*b*]isoquinolin-10(5*H*)-one (3e):**  $^1\text{H}$  NMR (600 MHz,  $\text{CDCl}_3$ , TMS):  $\delta$  = 8.43 (s, 1H), 7.68 (d,  $J$  = 8.1 Hz, 1H), 7.22-7.24 (m, 2H), 7.10 (s, 1H), 6.46 (s, 1H), 5.35 (s, 2H);  $^{13}\text{C}$  NMR (150 MHz,  $\text{CDCl}_3$ , TMS):  $\delta$  = 173.35, 135.44, 134.33, 132.45, 130.23, 129.36, 127.55, 126.12, 122.37, 114.46, 112.23, 46.80; HRMS (ESI) calcd for  $\text{C}_{12}\text{H}_8\text{BrNNaO}$   $[\text{M}+\text{Na}]^+ = 261.9862$ , found 261.9860.

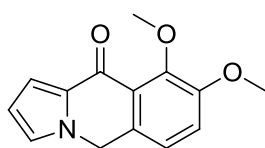

**8,9-Dimethoxypyrrolo[1,2-*b*]isoquinolin-10(5*H*)-one (3f):**  $^1\text{H}$  NMR (600 MHz,  $\text{CDCl}_3$ , TMS):  $\delta$  = 7.12-7.13 (m, 2H), 7.05 (dt,  $J$  = 0.9, 1.8, 8.4 Hz, 1H), 6.97-6.98 (m, 1H), 6.38 (dd,  $J$  = 2.5, 4.0 Hz, 1H), 5.28 (s, 1H), 3.96 (s, 3H), 3.90 (s, 3H);  $^{13}\text{C}$  NMR (150 MHz,  $\text{CDCl}_3$ , TMS):  $\delta$  = 174.77, 153.38, 150.75, 130.96, 129.07, 125.12, 124.38, 121.42, 116.60, 113.48, 111.50, 61.49, 56.44, 46.73; HRMS (ESI) calcd for  $\text{C}_{14}\text{H}_{14}\text{NO}_3$   $[\text{M}+\text{H}]^+ = 244.0968$ , found 244.0969.

### General procedure for the preparation of target compounds 3g-t

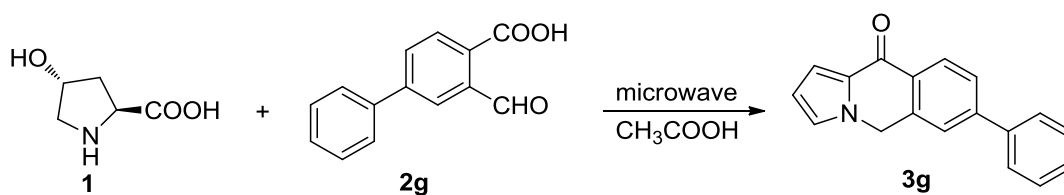

A 10 mL microwave reaction tube was charged with *trans*-4-hydroxy-*L*-proline **1** (0.13 g, 1.0 mmol, 1.0 equiv), 3-formyl-[1,1'-biphenyl]-4-carboxylic acid **2g** (0.27 g, 1.2 mmol, 1.2 equiv), and  $\text{CH}_3\text{COOH}$  (2.0 mL). The reaction tube was sealed with a Teflon-lined snap cap and heated in the microwave reactor at 170 °C at very high absorption level for 20 min. After cooling, the crude reaction mixture was evaporated in vacuo and the crude product was purified by silica gel column chromatography (petroleum ether/EtOAc = 16:1-14:1, v/v) to give **3g** (0.078 g, 30.0% yield) as a white

solid. The synthetic method for compounds **3h-t** were similar to the synthesis of compound **3g**.

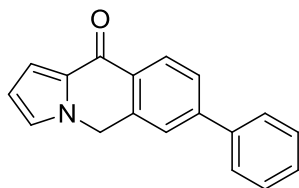

**7-Phenylpyrrolo[1,2-*b*]isoquinolin-10(5*H*)-one (3g):**  $^1\text{H}$  NMR (600 MHz,  $\text{CDCl}_3$ , TMS):  $\delta$  = 8.38 (d,  $J$  = 8.1 Hz, 1H), 7.71 (dt,  $J$  = 0.9, 1.7, 8.1 Hz, 1H), 7.63-7.65 (m, 2H), 7.55 (d,  $J$  = 0.9 Hz, 1H), 7.47-7.50 (m, 2H), 7.42 (tt,  $J$  = 1.2, 2.4, 6.9 Hz, 1H), 7.23 (dd,  $J$  = 1.5, 3.9 Hz, 3H), 7.10-7.11 (m, 1H), 6.46 (dd,  $J$  = 2.4, 4.0 Hz, 1H), 5.47 (s, 2H);  $^{13}\text{C}$  NMR (150 MHz,  $\text{CDCl}_3$ , TMS):  $\delta$  = 174.60, 145.33, 139.66, 136.14, 129.88, 129.56, 129.04, 128.43, 127.85, 127.30, 126.89, 125.63, 124.19, 113.17, 111.75, 47.16; HRMS (ESI) calcd for  $\text{C}_{18}\text{H}_{14}\text{NO}$   $[\text{M}+\text{H}]^+ = 260.1070$ , found 260.1071.

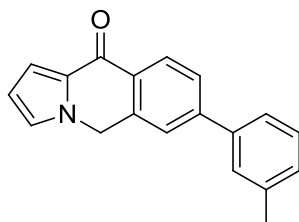

**7-(*M*-tolyl)pyrrolo[1,2-*b*]isoquinolin-10(5*H*)-one (3h):**  $^1\text{H}$  NMR (600 MHz,  $\text{CDCl}_3$ , TMS):  $\delta$  = 8.37 (d,  $J$  = 8.0 Hz, 1H), 7.69-7.71 (m, 1H), 7.54 (s, 1H), 7.42-7.45 (m, 2H), 7.37 (t,  $J$  = 7.6 Hz, 1H), 7.23-7.24 (m, 2H), 7.11 (s, 1H), 6.46 (dd,  $J$  = 2.4, 3.9 Hz, 1H), 5.47 (s, 2H), 2.44 (s, 3H);  $^{13}\text{C}$  NMR (150 MHz,  $\text{CDCl}_3$ , TMS):  $\delta$  = 174.16, 144.98, 138.22, 135.58, 129.38, 128.96, 128.68, 128.45, 127.55, 127.29, 126.41, 125.12, 123.91, 123.68, 123.02, 115.42, 113.25, 111.24, 46.66, 31.12; HRMS (ESI) calcd for  $\text{C}_{19}\text{H}_{16}\text{NO}$   $[\text{M}+\text{H}]^+ = 274.1226$ , found 274.1228.

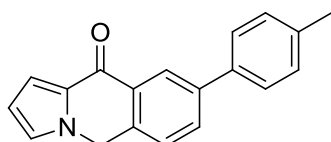

**8-(*P*-tolyl)pyrrolo[1,2-*b*]isoquinolin-10(5*H*)-one (3i):**  $^1\text{H}$  NMR (600 MHz,  $\text{CDCl}_3$ , TMS):  $\delta$  = 8.58 (s, 1H), 7.83 (dd,  $J$  = 1.3, 7.5 Hz, 1H), 7.62 (d,  $J$  = 8.0 Hz, 2H), 7.43 (d,  $J$  = 7.8 Hz, 1H), 7.32 (d,  $J$  = 7.8 Hz, 2H), 7.14 (s, 1H), 6.49-6.50 (m, 1H), 5.46 (s, 2H), 2.45 (s, 3H);  $^{13}\text{C}$  NMR (150 MHz,  $\text{CDCl}_3$ , TMS):  $\delta$  = 174.80, 140.87, 137.77, 136.72, 134.11, 130.93, 129.80, 129.65, 126.92, 126.21, 125.67, 125.12, 113.85, 111.75, 46.85, 21.13; HRMS (ESI) calcd for  $\text{C}_{19}\text{H}_{16}\text{NO}$   $[\text{M}+\text{H}]^+ = 274.1226$ , found 274.1228.

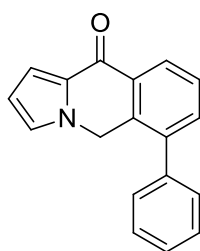

**6-Phenylpyrrolo[1,2-*b*]isoquinolin-10(5*H*)-one (3j):**  $^1\text{H}$  NMR (600 MHz,  $\text{CDCl}_3$ , TMS):  $\delta$  = 8.39 (dd,  $J$  = 1.0, 7.7 Hz, 1H), 7.56 (t,  $J$  = 7.6 Hz, 1H), 7.50-7.53 (m, 2H), 7.47-7.49 (m, 2H), 7.34-7.35 (m, 2H), 7.21 (dd,  $J$  = 1.1, 3.9 Hz, 1H), 6.96-6.97 (m, 1H), 6.42 (dd,  $J$  = 2.5, 4.0 Hz, 1H), 5.20 (s, 2H);  $^{13}\text{C}$  NMR (150 MHz,  $\text{CDCl}_3$ , TMS):  $\delta$  = 176.26, 141.45, 140.76, 135.20, 134.61, 132.44, 130.58, 130.29, 130.11, 129.46, 129.11, 127.94, 127.28, 115.03, 113.17, 47.70; HRMS (ESI) calcd for  $\text{C}_{18}\text{H}_{14}\text{NO}$   $[\text{M}+\text{H}]^+ = 260.1070$ , found 260.1068.

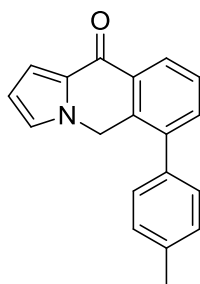

**6-(*P*-tolyl)pyrrolo[1,2-*b*]isoquinolin-10(5*H*)-one (3k):**  $^1\text{H}$  NMR (600 MHz,  $\text{CDCl}_3$ , TMS):  $\delta$  = 8.41 (dd,  $J$  = 1.2, 8.0 Hz, 1H), 7.59 (t,  $J$  = 7.4 Hz, 1H), 7.50 (dd,  $J$  = 1.5, 7.7 Hz, 1H), 7.37 (d,  $J$  = 7.7 Hz, 2H), 7.28 (d,  $J$  = 8.0 Hz, 2H), 7.25 (dd,  $J$  = 1.5, 3.9 Hz, 1H), 7.01-7.02 (m, 1H), 6.46 (dd,  $J$  = 2.4, 4.0 Hz, 1H), 5.26 (s, 2H), 2.52 (s, 3H);

$^{13}\text{C}$  NMR (150 MHz,  $\text{CDCl}_3$ , TMS):  $\delta$  = 174.92, 140.06, 137.91, 136.40, 133.90, 133.32, 131.03, 129.54, 129.21, 128.58, 127.67, 126.38, 125.81, 113.57, 11.72, 46.32, 29.71, 21.27; HRMS (ESI) calcd for  $\text{C}_{19}\text{H}_{16}\text{NO}$   $[\text{M}+\text{H}]^+ = 274.1226$ , found 274.1227.

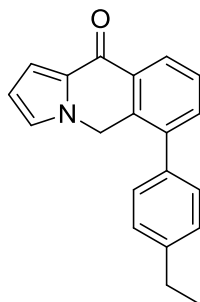

**6-(4-Ethylphenyl)pyrrolo[1,2-*b*]isoquinolin-10(5*H*)-one (3l):**  $^1\text{H}$  NMR (600 MHz,  $\text{CDCl}_3$ , TMS):  $\delta$  = 8.39 (dd,  $J$  = 0.9, 7.7 Hz, 1H), 7.57 (t,  $J$  = 7.5 Hz, 1H), 7.49 (dd,  $J$  = 1.2, 7.4 Hz, 1H), 7.38 (d,  $J$  = 7.9 Hz, 2H), 7.28-7.30 (m, 2H), 7.23 (dd,  $J$  = 1.3, 3.9 Hz, 1H), 7.00 (t,  $J$  = 1.8 Hz, 1H), 6.43 (dd,  $J$  = 2.4, 3.9 Hz, 1H), 5.25 (s, 2H), 2.80 (q,  $J$  = 7.6 Hz, 2H), 1.38 (t,  $J$  = 7.6 Hz, 3H);  $^{13}\text{C}$  NMR (150 MHz,  $\text{CDCl}_3$ , TMS):  $\delta$  = 174.92, 144.15, 140.07, 136.56, 133.92, 130.97, 129.16, 128.62, 128.31, 127.64, 126.32, 125.85, 113.55, 111.70, 46.32, 28.61, 15.45; HRMS (ESI) calcd for  $\text{C}_{20}\text{H}_{18}\text{NO}$   $[\text{M}+\text{H}]^+ = 288.1383$ , found 288.1385.

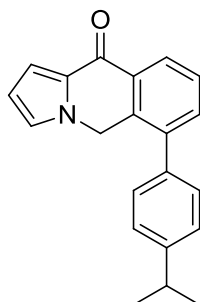

**6-(4-Isopropylphenyl)pyrrolo[1,2-*b*]isoquinolin-10(5*H*)-one (3m):**  $^1\text{H}$  NMR (600 MHz,  $\text{CDCl}_3$ , TMS):  $\delta$  = 8.40 (dd,  $J$  = 1.0, 7.8 Hz, 1H), 7.58 (t,  $J$  = 7.6 Hz, 1H), 7.50 (dd,  $J$  = 1.2, 7.4 Hz, 1H), 7.40 (d,  $J$  = 7.9 Hz, 2H), 7.30 (s, 1H), 7.29 (s, 1H), 7.24 (dd,  $J$  = 1.3, 3.9 Hz, 1H), 7.02 (t,  $J$  = 1.88 Hz, 1H), 6.44 (dd,  $J$  = 2.4, 3.9 Hz, 1H), 5.26 (s, 2H), 3.03-3.07 (m, 1H), 1.38 (d,  $J$  = 6.9 Hz, 6H);  $^{13}\text{C}$  NMR (150 MHz,  $\text{CDCl}_3$ , TMS):  $\delta$  = 175.58, 149.39, 140.73, 137.33, 14.59, 133.95, 131.68, 129.86, 129.25, 128.29,



127.53, 126.99, 126.44, 114.19, 112.33, 46.98, 34.55, 24.62; HRMS (ESI) calcd for  $C_{21}H_{20}NO$   $[M+H]^+ = 302.1539$ , found 302.1540.

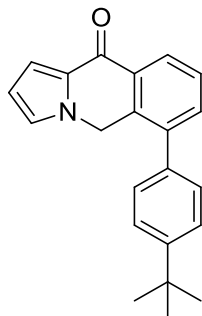

**6-(4-(*Tert*-butyl)phenyl)pyrrolo[1,2-*b*]isoquinolin-10(5*H*)-one (3n):**  $^1H$  NMR (600 MHz,  $CDCl_3$ , TMS):  $\delta$  = 8.40 (dd,  $J$  = 1.1, 7.8 Hz, 1H), 7.54-7.59 (m, 3H), 7.49 (dd,  $J$  = 1.2, 7.4 Hz, 1H), 7.31 (t,  $J$  = 2.2 Hz, 1H), 7.23 (dd,  $J$  = 1.3, 3.9 Hz, 1H), 7.02 (t,  $J$  = 1.8 Hz, 1H), 6.44 (dd,  $J$  = 2.5, 4.4 Hz, 1H), 5.27 (s, 2H), 1.45 (s, 9H);  $^{13}C$  NMR (150 MHz,  $CDCl_3$ , TMS):  $\delta$  = 174.96, 151.07, 140.04, 136.32, 133.98, 133.34, 131.05, 129.24, 128.38, 127.66, 126.36, 125.84, 125.76, 113.56, 111.70, 46.37, 34.73, 31.40; HRMS (ESI) calcd for  $C_{21}H_{22}NO$   $[M+H]^+ = 316.1696$ , found 316.1697.

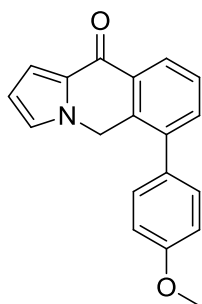

**6-(4-Methoxyphenyl)pyrrolo[1,2-*b*]isoquinolin-10(5*H*)-one (3o):**  $^1H$  NMR (600 MHz,  $CDCl_3$ , TMS):  $\delta$  = 8.34 (dd,  $J$  = 1.3, 7.7 Hz, 1H), 7.52 (t,  $J$  = 7.3 Hz, 1H), 7.44 (dd,  $J$  = 1.4, 7.4 Hz, 1H), 7.26 (t,  $J$  = 2.9 Hz, 1H), 7.24 (t,  $J$  = 2.8 Hz, 1H), 7.19 (dd,  $J$  = 1.5, 4.0 Hz, 1H), 7.03 (t,  $J$  = 2.9 Hz, 1H), 7.02 (t,  $J$  = 2.9 Hz, 1H), 6.95-6.96 (m, 1H), 6.40 (dd,  $J$  = 2.4, 3.9 Hz, 1H), 5.19 (s, 2H), 3.89 (s, 3H);  $^{13}C$  NMR (150 MHz,  $CDCl_3$ , TMS):  $\delta$  = 174.45, 158.93, 139.26, 133.54, 133.01, 130.54, 129.34, 128.69, 127.15, 125.81, 125.33, 113.76, 113.08, 111.23, 54.89, 45.85; HRMS (ESI) calcd for  $C_{19}H_{16}NO_2$   $[M+H]^+ = 290.1176$ , found 290.1178.

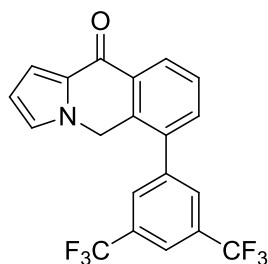

**6-(3,5-Bis(trifluoromethyl)phenyl)pyrrolo[1,2-*b*]isoquinolin-10(5*H*)-one (3p):**  $^1\text{H}$  NMR (600 MHz,  $\text{CDCl}_3$ , TMS):  $\delta$  = 8.49 (dd,  $J$  = 1.1, 7.8 Hz, 1H), 8.07 (s, 1H), 7.90 (s, 2H), 7.66 (t,  $J$  = 7.5 Hz, 1H), 7.52 (dd,  $J$  = 1.1, 7.3 Hz, 1H), 7.26 (dd,  $J$  = 1.3, 3.9 Hz, 1H), 7.05 (s, 1H), 6.49 (t,  $J$  = 2.5, 4.0 Hz, 1H), 5.19 (s, 2H);  $^{13}\text{C}$  NMR (150 MHz,  $\text{CDCl}_3$ , TMS):  $\delta$  = 174.05, 141.42, 136.79, 133.59, 132.81, 132.60, 132.38, 131.46, 129.02, 128.96, 128.22, 127.91, 126.11, 123.99, 122.24, 122.18, 114.15, 114.06, 112.15, 46.00;  $^{19}\text{F}$  NMR (282 MHz,  $\text{CDCl}_3$ , TMS):  $\delta$  = -62.72 (s, 6F); HRMS (ESI) calcd for  $\text{C}_{20}\text{H}_{12}\text{F}_6\text{NO}$   $[\text{M}+\text{H}]^+ = 396.0818$ , found 396.0819.

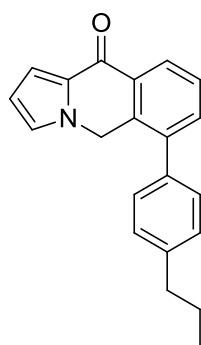

**6-(4-Propylphenyl)pyrrolo[1,2-*b*]isoquinolin-10(5*H*)-one (3q):**  $^1\text{H}$  NMR (600 MHz,  $\text{CDCl}_3$ , TMS):  $\delta$  = 8.39 (dd,  $J$  = 1.1, 7.8 Hz, 1H), 7.58 (t,  $J$  = 7.2 Hz, 1H), 7.50 (dd,  $J$  = 1.3, 7.4 Hz, 1H), 7.35 (d,  $J$  = 7.9 Hz, 2H), 7.27-7.29 (m, 2H), 7.23 (dd,  $J$  = 1.4, 3.9 Hz, 1H), 7.01 (s, 1H), 6.44 (dd,  $J$  = 2.4, 3.9 Hz, 1H), 5.25 (s, 2H), 2.73 (t,  $J$  = 7.6 Hz, 2H), 1.74-1.81 (m, 2H), 1.06 (t,  $J$  = 7.3 Hz, 3H);  $^{13}\text{C}$  NMR (150 MHz,  $\text{CDCl}_3$ , TMS):  $\delta$  = 174.94, 142.65, 140.08, 136.57, 133.94, 133.30, 130.99, 129.18, 128.88, 128.53, 127.64, 126.34, 125.84, 113.57, 111.70, 46.31, 37.80, 24.49, 13.94; HRMS (ESI) calcd for  $\text{C}_{21}\text{H}_{20}\text{NO}$   $[\text{M}+\text{H}]^+ = 302.1539$ , found 302.1540.

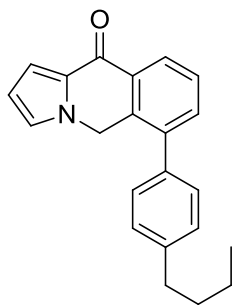

**6-(4-Butylphenyl)pyrrolo[1,2-*b*]isoquinolin-10(5*H*)-one (3r):**  $^1\text{H}$  NMR (600 MHz,  $\text{CDCl}_3$ , TMS):  $\delta$  = 8.36 (dd,  $J$  = 1.2, 7.8 Hz, 1H), 7.54 (t,  $J$  = 7.6 Hz, 1H), 7.46 (dd,  $J$  = 1.3, 7.4 Hz, 1H), 7.32 (d,  $J$  = 8.0 Hz, 2H), 7.24 (d,  $J$  = 8.3 Hz, 2H), 7.20 (dd,  $J$  = 1.5, 4.0 Hz, 1H), 6.97 (t,  $J$  = 1.6 Hz, 1H), 6.41 (dd,  $J$  = 2.4, 3.9 Hz, 1H), 5.21 (s, 2H), 2.72 (t,  $J$  = 7.8 Hz, 2H), 1.67-1.72 (m, 2H), 1.42-1.43 (m, 2H), 0.99 (t,  $J$  = 7.3 Hz, 3H);  $^{13}\text{C}$  NMR (150 MHz,  $\text{CDCl}_3$ , TMS):  $\delta$  = 174.44, 142.40, 139.61, 136.06, 133.44, 132.82, 130.54, 128.73, 128.35, 128.06, 127.16, 125.86, 125.32, 113.06, 111.20, 45.84, 34.94, 33.09, 29.21, 21.99, 13.50; HRMS (ESI) calcd for  $\text{C}_{22}\text{H}_{21}\text{NO}$   $[\text{M}+\text{H}]^+ = 316.1696$ , found 316.1697.

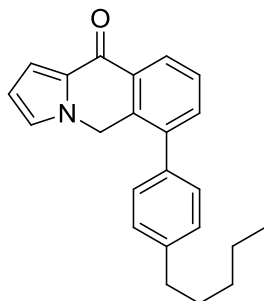

**6-(4-Pentylphenyl)pyrrolo[1,2-*b*]isoquinolin-10(5*H*)-one (3s):**  $^1\text{H}$  NMR (600 MHz,  $\text{CDCl}_3$ , TMS):  $\delta$  = 8.36 (dt,  $J$  = 1.1, 2.3, 7.8 Hz, 1H), 7.52-7.55 (m, 1H), 7.46 (dd,  $J$  = 0.7, 7.4 Hz, 1H), 7.30-7.33 (m, 2H), 7.24 (dt,  $J$  = 1.7, 3.6, 8.0 Hz, 2H), 7.20 (dt,  $J$  = 1.1, 2.4, 4.0 Hz, 1H), 6.96-6.97 (m, 1H), 6.40-6.41 (m, 1H), 5.21 (s, 2H), 2.70 (t,  $J$  = 7.7 Hz, 2), 1.69-1.74 (m, 2H), 1.38-1.43 (m, 4H), 0.93-0.96 (m, 3H);  $^{13}\text{C}$  NMR (150 MHz,  $\text{CDCl}_3$ , TMS):  $\delta$  = 174.44, 142.45, 139.61, 136.05, 133.44, 132.82, 130.54, 128.72, 128.33, 128.06, 127.15, 125.86, 125.32, 113.06, 111.20, 45.84, 35.23, 31.15, 30.63, 29.21, 22.08, 13.57; HRMS (ESI) calcd for  $\text{C}_{23}\text{H}_{24}\text{NO}$   $[\text{M}+\text{H}]^+ = 330.1852$ , found 330.1853.

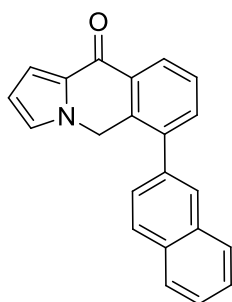

**6-(Naphthalen-2-yl)pyrrolo[1,2-*b*]isoquinolin-10(5*H*)-one (3t):**  $^1\text{H}$  NMR (600 MHz,  $\text{CDCl}_3$ , TMS):  $\delta$  = 8.42 (dd,  $J$  = 1.5, 7.7 Hz, 1H), 7.99 (d,  $J$  = 8.4 Hz, 1H), 7.96 (dd,  $J$  = 3.1, 5.9 Hz, 1H), 7.90 (dd,  $J$  = 3.4, 6.1 Hz, 1H), 7.82 (d,  $J$  = 0.7 Hz, 1H), 7.55-7.61 (m, 4H), 7.46 (dd,  $J$  = 1.7, 8.3 Hz, 1H), 7.21 (dd,  $J$  = 1.5, 4.0 Hz, 1H), 6.91 (dd,  $J$  = 1.6, 2.1 Hz, 1H), 6.40 (dd,  $J$  = 2.4, 4.0 Hz, 1H), 5.24 (s, 2H);  $^{13}\text{C}$  NMR (150 MHz,  $\text{CDCl}_3$ , TMS):  $\delta$  = 174.35, 139.50, 136.27, 133.42, 132.95, 132.83, 132.30, 130.62, 128.71, 128.14, 127.56, 127.38, 127.27, 127.22, 126.34, 126.16, 126.09, 125.35, 113.17, 111.28, 45.91, 29.21; HRMS (ESI) calcd for  $\text{C}_{22}\text{H}_{16}\text{NO}$   $[\text{M}+\text{H}]^+ = 310.1226$ , found 310.1228.

**Table S1. Further exploration of the optimized reaction condition of diphenyl substituted substrate 2g.<sup>a</sup>**

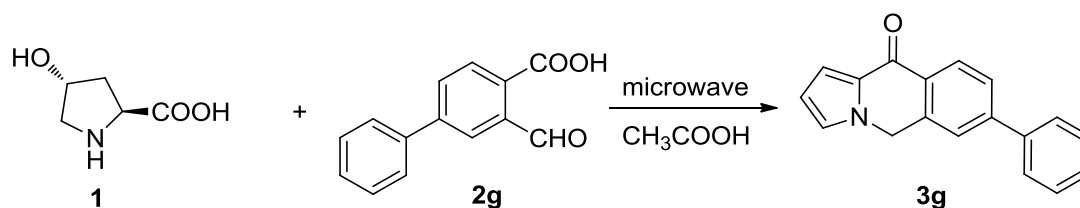

| Entry | Product | 1 : 2<br>(equivalence<br>ratio) | Time<br>(min) | Yield <sup>b</sup><br>(%) |
|-------|---------|---------------------------------|---------------|---------------------------|
| 1     | 3g      | 1.2:1                           | 20            | 20%                       |
| 2     | 3g      | 1:1                             | 20            | 18%                       |
| 3     | 3g      | 1:1.2                           | 20            | 25%                       |
| 4     | 3g      | 1:1.2                           | 40            | 30%                       |

<sup>a</sup>Microwave reaction conditions (unless otherwise specified): solvent (2.0 mL), reaction mixture was heated in the microwave reactor at 170 °C for the appropriate time. <sup>b</sup> Yield of isolated product after column chromatography.

### X-ray structure of **3j**

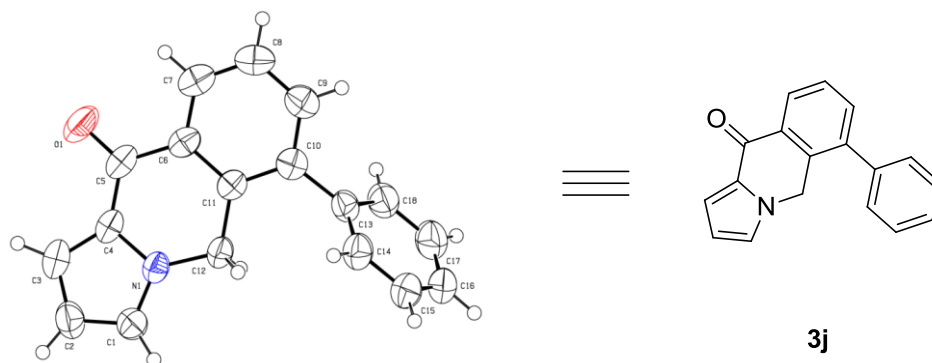

**Table 1.** Crystal data and structure refinement for a51209b (compound **3j**).

|                        |                                                                                              |
|------------------------|----------------------------------------------------------------------------------------------|
| Identification code    | a51209b                                                                                      |
| Empirical formula      | C <sub>18</sub> H <sub>13</sub> NO                                                           |
| Formula weight         | 259.29                                                                                       |
| Temperature            | 298(2) K                                                                                     |
| Wavelength             | 0.71073 Å                                                                                    |
| Crystal system         | Monoclinic                                                                                   |
| Space group            | P 2 <sub>1</sub> /c                                                                          |
| Unit cell dimensions   | a = 10.016(4) Å   α = 90°.<br>b = 9.223(3) Å   β = 94.662(4)°.<br>c = 13.978(5) Å   γ = 90°. |
| Volume                 | 1287.0(8) Å <sup>3</sup>                                                                     |
| Z                      | 4                                                                                            |
| Density (calculated)   | 1.338 Mg/m <sup>3</sup>                                                                      |
| Absorption coefficient | 0.083 mm <sup>-1</sup>                                                                       |

|                                   |                                             |
|-----------------------------------|---------------------------------------------|
| F(000)                            | 544                                         |
| Crystal size                      | 0.200 x 0.120 x 0.100 mm <sup>3</sup>       |
| Theta range for data collection   | 2.040 to 25.998°.                           |
| Index ranges                      | -10<=h<=12, -11<=k<=9, -17<=l<=16           |
| Reflections collected             | 5708                                        |
| Independent reflections           | 2525 [R(int) = 0.0566]                      |
| Completeness to theta = 25.242°   | 99.8 %                                      |
| Absorption correction             | Semi-empirical from equivalents             |
| Max. and min. transmission        | 1.000 and 0.328                             |
| Refinement method                 | Full-matrix least-squares on F <sup>2</sup> |
| Data / restraints / parameters    | 2525 / 0 / 182                              |
| Goodness-of-fit on F <sup>2</sup> | 0.927                                       |
| Final R indices [I>2sigma(I)]     | R1 = 0.0488, wR2 = 0.1156                   |
| R indices (all data)              | R1 = 0.0716, wR2 = 0.1226                   |
| Extinction coefficient            | 0.018(3)                                    |
| Largest diff. peak and hole       | 0.174 and -0.166 e.Å <sup>-3</sup>          |

**Table 2.** Atomic coordinates ( $\times 10^4$ ) and equivalent isotropic displacement parameters ( $\text{\AA}^2 \times 10^3$ ) for a51209b (compound **3j**). U(eq) is defined as one third of the trace of the orthogonalized  $U^{ij}$  tensor.

|       | x       | y       | z       | U(eq) |
|-------|---------|---------|---------|-------|
| N(1)  | 5859(1) | 1675(1) | 4833(1) | 43(1) |
| O(1)  | 6071(1) | 3067(2) | 7222(1) | 76(1) |
| C(1)  | 6750(2) | 877(2)  | 4390(1) | 53(1) |
| C(2)  | 7821(2) | 580(2)  | 5037(1) | 60(1) |
| C(3)  | 7566(2) | 1208(2) | 5901(1) | 57(1) |
| C(4)  | 6350(2) | 1905(2) | 5772(1) | 46(1) |
| C(5)  | 5666(2) | 2864(2) | 6376(1) | 51(1) |
| C(6)  | 4467(2) | 3625(2) | 5935(1) | 46(1) |
| C(7)  | 3858(2) | 4670(2) | 6465(1) | 58(1) |
| C(8)  | 2711(2) | 5358(2) | 6099(1) | 63(1) |
| C(9)  | 2122(2) | 4932(2) | 5215(1) | 58(1) |
| C(10) | 2685(2) | 3875(2) | 4669(1) | 47(1) |
| C(11) | 3906(2) | 3250(2) | 5015(1) | 42(1) |
| C(12) | 4569(2) | 2169(2) | 4406(1) | 45(1) |
| C(13) | 1927(2) | 3355(2) | 3767(1) | 47(1) |
| C(14) | 2385(2) | 3536(2) | 2867(1) | 56(1) |
| C(15) | 1676(2) | 2980(2) | 2062(1) | 66(1) |
| C(16) | 507(2)  | 2228(2) | 2143(2) | 70(1) |
| C(17) | 25(2)   | 2065(2) | 3030(2) | 71(1) |
| C(18) | 728(2)  | 2626(2) | 3834(1) | 58(1) |

**Table 3.** Bond lengths [Å] and angles [°] for a51209b (compound **3j**).

---

|                 |            |
|-----------------|------------|
| N(1)-C(1)       | 1.345(2)   |
| N(1)-C(4)       | 1.3805(19) |
| N(1)-C(12)      | 1.4515(19) |
| O(1)-C(5)       | 1.2336(19) |
| C(1)-C(2)       | 1.374(2)   |
| C(2)-C(3)       | 1.383(3)   |
| C(3)-C(4)       | 1.376(2)   |
| C(4)-C(5)       | 1.435(2)   |
| C(5)-C(6)       | 1.481(2)   |
| C(6)-C(7)       | 1.387(2)   |
| C(6)-C(11)      | 1.404(2)   |
| C(7)-C(8)       | 1.374(3)   |
| C(8)-C(9)       | 1.383(2)   |
| C(9)-C(10)      | 1.386(2)   |
| C(10)-C(11)     | 1.402(2)   |
| C(10)-C(13)     | 1.498(2)   |
| C(11)-C(12)     | 1.500(2)   |
| C(13)-C(14)     | 1.383(2)   |
| C(13)-C(18)     | 1.387(2)   |
| C(14)-C(15)     | 1.381(3)   |
| C(15)-C(16)     | 1.373(3)   |
| C(16)-C(17)     | 1.375(3)   |
| C(17)-C(18)     | 1.377(3)   |
|                 |            |
| C(1)-N(1)-C(4)  | 108.89(13) |
| C(1)-N(1)-C(12) | 125.72(13) |
| C(4)-N(1)-C(12) | 125.35(13) |
| N(1)-C(1)-C(2)  | 108.53(15) |



|                   |            |
|-------------------|------------|
| C(1)-C(2)-C(3)    | 107.56(16) |
| C(4)-C(3)-C(2)    | 107.81(15) |
| C(3)-C(4)-N(1)    | 107.21(15) |
| C(3)-C(4)-C(5)    | 132.14(15) |
| N(1)-C(4)-C(5)    | 120.26(14) |
| O(1)-C(5)-C(4)    | 121.46(16) |
| O(1)-C(5)-C(6)    | 121.32(16) |
| C(4)-C(5)-C(6)    | 117.21(13) |
| C(7)-C(6)-C(11)   | 120.02(16) |
| C(7)-C(6)-C(5)    | 118.92(14) |
| C(11)-C(6)-C(5)   | 120.99(14) |
| C(8)-C(7)-C(6)    | 120.83(16) |
| C(7)-C(8)-C(9)    | 119.01(17) |
| C(8)-C(9)-C(10)   | 121.88(16) |
| C(9)-C(10)-C(11)  | 118.84(15) |
| C(9)-C(10)-C(13)  | 119.16(15) |
| C(11)-C(10)-C(13) | 121.84(14) |
| C(10)-C(11)-C(6)  | 119.17(14) |
| C(10)-C(11)-C(12) | 119.44(13) |
| C(6)-C(11)-C(12)  | 121.38(14) |
| N(1)-C(12)-C(11)  | 113.33(12) |
| C(14)-C(13)-C(18) | 118.25(16) |
| C(14)-C(13)-C(10) | 122.99(15) |
| C(18)-C(13)-C(10) | 118.74(15) |
| C(15)-C(14)-C(13) | 120.67(18) |
| C(16)-C(15)-C(14) | 120.35(19) |
| C(15)-C(16)-C(17) | 119.66(18) |
| C(16)-C(17)-C(18) | 120.04(18) |
| C(17)-C(18)-C(13) | 120.99(17) |

---

Symmetry transformations used to generate equivalent atoms:

**Table 4.** Anisotropic displacement parameters ( $\text{\AA}^2 \times 10^3$ ) for a51209b (compound **3j**).

The anisotropic displacement factor exponent takes the form:  $-2\pi^2 [h^2 a^{*2} U^{11} + \dots + 2 h k a^* b^* U^{12}]$

|       | $U^{11}$ | $U^{22}$ | $U^{33}$ | $U^{23}$ | $U^{13}$ | $U^{12}$ |
|-------|----------|----------|----------|----------|----------|----------|
| N(1)  | 43(1)    | 50(1)    | 36(1)    | 4(1)     | -3(1)    | -1(1)    |
| O(1)  | 92(1)    | 90(1)    | 42(1)    | -13(1)   | -16(1)   | 1(1)     |
| C(1)  | 53(1)    | 63(1)    | 44(1)    | 1(1)     | 3(1)     | 8(1)     |
| C(2)  | 48(1)    | 72(1)    | 59(1)    | 10(1)    | -2(1)    | 10(1)    |
| C(3)  | 51(1)    | 66(1)    | 52(1)    | 8(1)     | -14(1)   | -8(1)    |
| C(4)  | 48(1)    | 53(1)    | 37(1)    | 3(1)     | -6(1)    | -9(1)    |
| C(5)  | 59(1)    | 54(1)    | 37(1)    | -1(1)    | -5(1)    | -14(1)   |
| C(6)  | 52(1)    | 46(1)    | 40(1)    | -2(1)    | 6(1)     | -11(1)   |
| C(7)  | 70(1)    | 56(1)    | 47(1)    | -7(1)    | 7(1)     | -11(1)   |
| C(8)  | 74(1)    | 53(1)    | 64(1)    | -10(1)   | 18(1)    | 0(1)     |
| C(9)  | 58(1)    | 54(1)    | 62(1)    | 2(1)     | 9(1)     | 6(1)     |
| C(10) | 50(1)    | 45(1)    | 46(1)    | 6(1)     | 7(1)     | -3(1)    |
| C(11) | 46(1)    | 42(1)    | 38(1)    | 3(1)     | 4(1)     | -6(1)    |
| C(12) | 44(1)    | 52(1)    | 37(1)    | 2(1)     | -5(1)    | 0(1)     |
| C(13) | 44(1)    | 46(1)    | 50(1)    | 4(1)     | -2(1)    | 8(1)     |
| C(14) | 51(1)    | 65(1)    | 52(1)    | 10(1)    | -2(1)    | 0(1)     |
| C(15) | 66(1)    | 79(1)    | 50(1)    | 2(1)     | -6(1)    | 14(1)    |
| C(16) | 56(1)    | 80(1)    | 70(1)    | -17(1)   | -18(1)   | 14(1)    |
| C(17) | 47(1)    | 81(1)    | 85(2)    | -9(1)    | -4(1)    | -2(1)    |
| C(18) | 48(1)    | 66(1)    | 60(1)    | 2(1)     | 3(1)     | 4(1)     |

**Table 5.** Hydrogen coordinates ( $\times 10^4$ ) and isotropic displacement parameters ( $\text{\AA}^2 \times 10^3$ ) for a51209b (compound **3j**).

|        | x    | y    | z    | U(eq) |
|--------|------|------|------|-------|
| H(1)   | 6656 | 577  | 3753 | 64    |
| H(2)   | 8580 | 51   | 4915 | 72    |
| H(3)   | 8118 | 1168 | 6468 | 69    |
| H(7)   | 4231 | 4909 | 7076 | 69    |
| H(8)   | 2337 | 6099 | 6441 | 76    |
| H(9)   | 1324 | 5368 | 4979 | 69    |
| H(12A) | 3983 | 1338 | 4297 | 54    |
| H(12B) | 4691 | 2604 | 3788 | 54    |
| H(14)  | 3179 | 4036 | 2805 | 67    |
| H(15)  | 1991 | 3115 | 1460 | 79    |
| H(16)  | 45   | 1831 | 1602 | 84    |
| H(17)  | -777 | 1575 | 3087 | 85    |
| H(18)  | 393  | 2513 | 4431 | 70    |

**Table 6.** Torsion angles [°] for a51209b (compound **3j**).

|                         |             |
|-------------------------|-------------|
| C(4)-N(1)-C(1)-C(2)     | 0.16(19)    |
| C(12)-N(1)-C(1)-C(2)    | -177.68(15) |
| N(1)-C(1)-C(2)-C(3)     | 0.5(2)      |
| C(1)-C(2)-C(3)-C(4)     | -0.9(2)     |
| C(2)-C(3)-C(4)-N(1)     | 1.02(19)    |
| C(2)-C(3)-C(4)-C(5)     | -171.60(17) |
| C(1)-N(1)-C(4)-C(3)     | -0.74(18)   |
| C(12)-N(1)-C(4)-C(3)    | 177.12(14)  |
| C(1)-N(1)-C(4)-C(5)     | 172.93(14)  |
| C(12)-N(1)-C(4)-C(5)    | -9.2(2)     |
| C(3)-C(4)-C(5)-O(1)     | -9.5(3)     |
| N(1)-C(4)-C(5)-O(1)     | 178.68(15)  |
| C(3)-C(4)-C(5)-C(6)     | 169.33(17)  |
| N(1)-C(4)-C(5)-C(6)     | -2.5(2)     |
| O(1)-C(5)-C(6)-C(7)     | 5.3(2)      |
| C(4)-C(5)-C(6)-C(7)     | -173.53(14) |
| O(1)-C(5)-C(6)-C(11)    | -171.45(15) |
| C(4)-C(5)-C(6)-C(11)    | 9.7(2)      |
| C(11)-C(6)-C(7)-C(8)    | -0.4(3)     |
| C(5)-C(6)-C(7)-C(8)     | -177.22(15) |
| C(6)-C(7)-C(8)-C(9)     | 3.9(3)      |
| C(7)-C(8)-C(9)-C(10)    | -2.8(3)     |
| C(8)-C(9)-C(10)-C(11)   | -1.7(3)     |
| C(8)-C(9)-C(10)-C(13)   | 173.75(16)  |
| C(9)-C(10)-C(11)-C(6)   | 5.1(2)      |
| C(13)-C(10)-C(11)-C(6)  | -170.25(14) |
| C(9)-C(10)-C(11)-C(12)  | -176.39(14) |
| C(13)-C(10)-C(11)-C(12) | 8.3(2)      |

|                         |             |
|-------------------------|-------------|
| C(7)-C(6)-C(11)-C(10)   | -4.1(2)     |
| C(5)-C(6)-C(11)-C(10)   | 172.62(14)  |
| C(7)-C(6)-C(11)-C(12)   | 177.44(14)  |
| C(5)-C(6)-C(11)-C(12)   | -5.8(2)     |
| C(1)-N(1)-C(12)-C(11)   | -169.85(14) |
| C(4)-N(1)-C(12)-C(11)   | 12.6(2)     |
| C(10)-C(11)-C(12)-N(1)  | 176.78(13)  |
| C(6)-C(11)-C(12)-N(1)   | -4.8(2)     |
| C(9)-C(10)-C(13)-C(14)  | 116.81(18)  |
| C(11)-C(10)-C(13)-C(14) | -67.8(2)    |
| C(9)-C(10)-C(13)-C(18)  | -65.0(2)    |
| C(11)-C(10)-C(13)-C(18) | 110.39(18)  |
| C(18)-C(13)-C(14)-C(15) | -1.1(3)     |
| C(10)-C(13)-C(14)-C(15) | 177.13(15)  |
| C(13)-C(14)-C(15)-C(16) | -0.5(3)     |
| C(14)-C(15)-C(16)-C(17) | 1.8(3)      |
| C(15)-C(16)-C(17)-C(18) | -1.4(3)     |
| C(16)-C(17)-C(18)-C(13) | -0.2(3)     |
| C(14)-C(13)-C(18)-C(17) | 1.5(3)      |
| C(10)-C(13)-C(18)-C(17) | -176.83(16) |

---

Symmetry transformations used to generate equivalent atoms:

# NMR Spectra

## NMR of compound 2a

wsc-0802-1a H

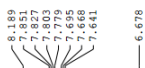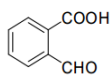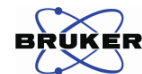

Current Data Parameters  
 NAME wsc-0802-1a  
 EXPNO 1  
 PROCNO 1

F2 - Acquisition Parameters  
 Date\_ 20151211  
 Time 23.53  
 INSTRUM spect  
 PROBHD 5 mm PABBO BB-  
 PULPROG zg30  
 TD 65536  
 SOLVENT DMSO  
 NS 16  
 DS 0  
 SWH 6009.615 Hz  
 FIDRES 0.091699 Hz  
 AQ 5.453453 sec  
 RG 287  
 DW 83.200 usec  
 DE 6.50 usec  
 TE 298.0 K  
 D1 1.00000000 sec  
 TDO 1

CHANNEL f1  
 SFO1 300.1318534 MHz  
 NUCL1 1H  
 P1 9.20 usec  
 PLW1 11.00000000 W

F2 - Processing parameters  
 S1 65536  
 SF 300.1300000 MHz  
 MDW EM  
 SSB 0  
 LB 0.30 Hz  
 GB 0  
 PC 1.00

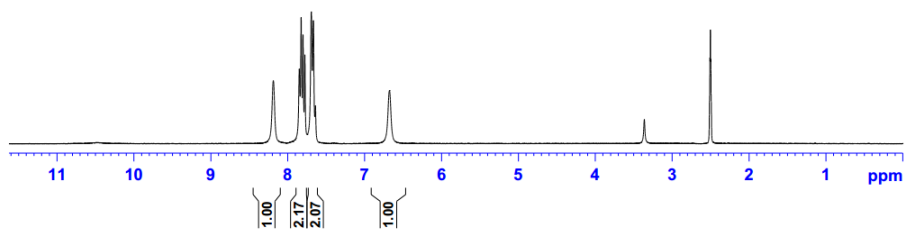

wsc-0802-1a C

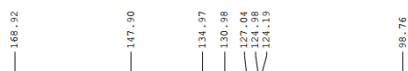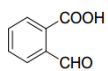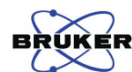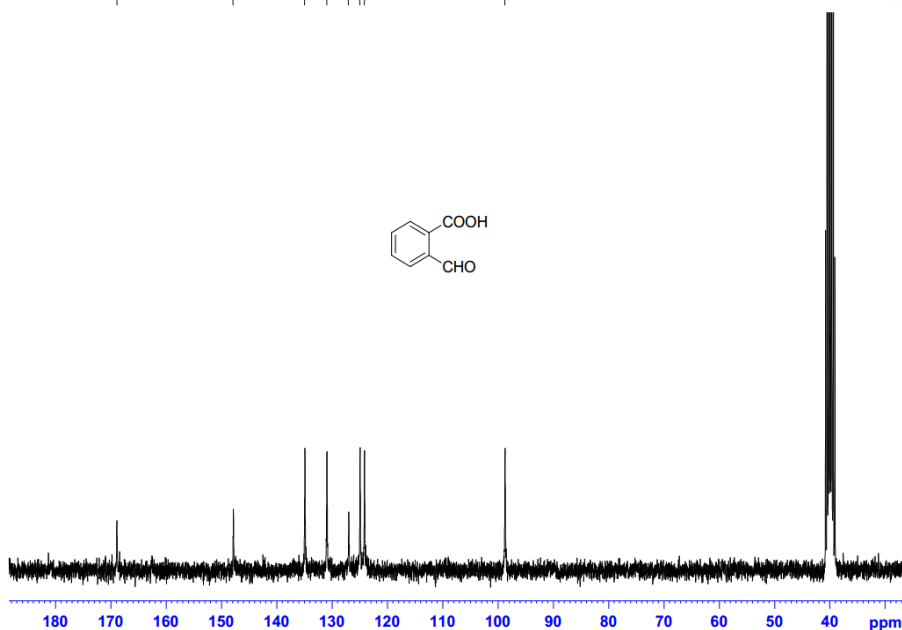

# NMR of compound **2c**

WSC-0827 H

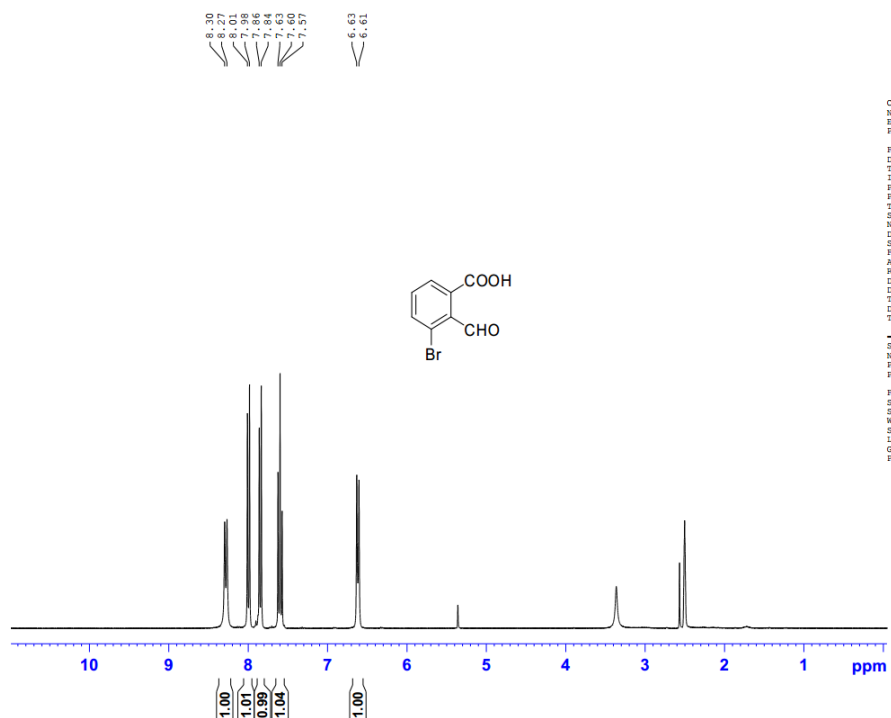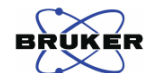

Current Data Parameters  
 NAME WSC-0827  
 EXPNO 1  
 PROCNO 1

F2 - Acquisition Parameters  
 Date\_ 20150617  
 Time 19.16  
 INSTRUM spect  
 PROHD 5 mm PABBO BB-  
 PULPROG zg30  
 TD 32768  
 SOLVENT DMSO  
 NS 16  
 DS 0  
 SWH 6009.615 Hz  
 FIDRES 0.183399 Hz  
 AQ 2.7263477 sec  
 RG 203  
 DW 83.200 usec  
 DE 6.50 usec  
 TE 298.0 K  
 D1 1.00000000 sec  
 TDO 1

----- CHANNEL f1 -----  
 SFO1 300.1318320 MHz  
 NUC1 1H  
 P1 12.90 usec  
 PLW1 11.00000000 W

F2 - Processing parameters  
 S1 65536  
 SF 300.1300008 MHz  
 WDW EM  
 SSB 0  
 LB 0.30 Hz  
 GB 0  
 PC 1.00

WSC-0827 C

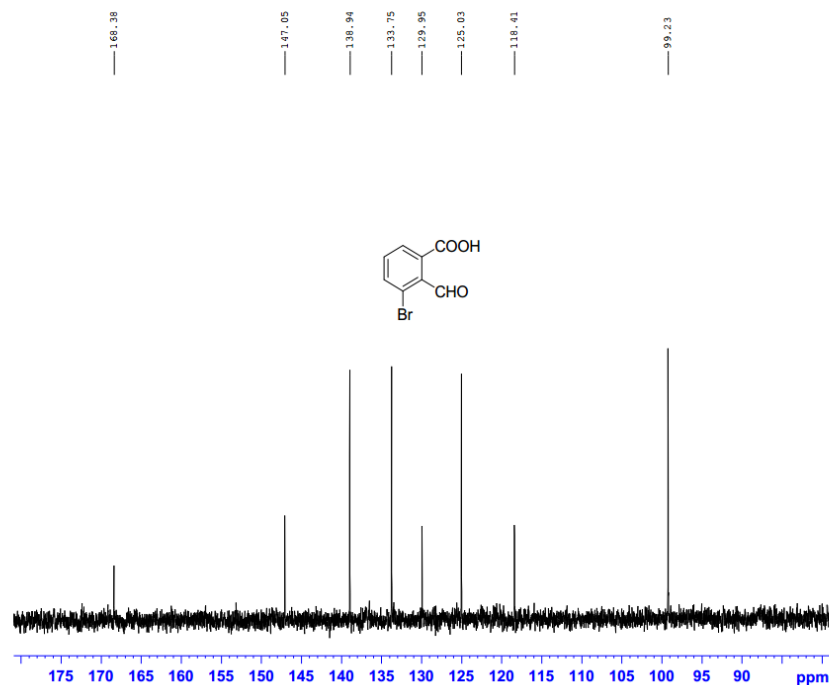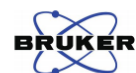

# NMR of compound 2d

wsc-0867

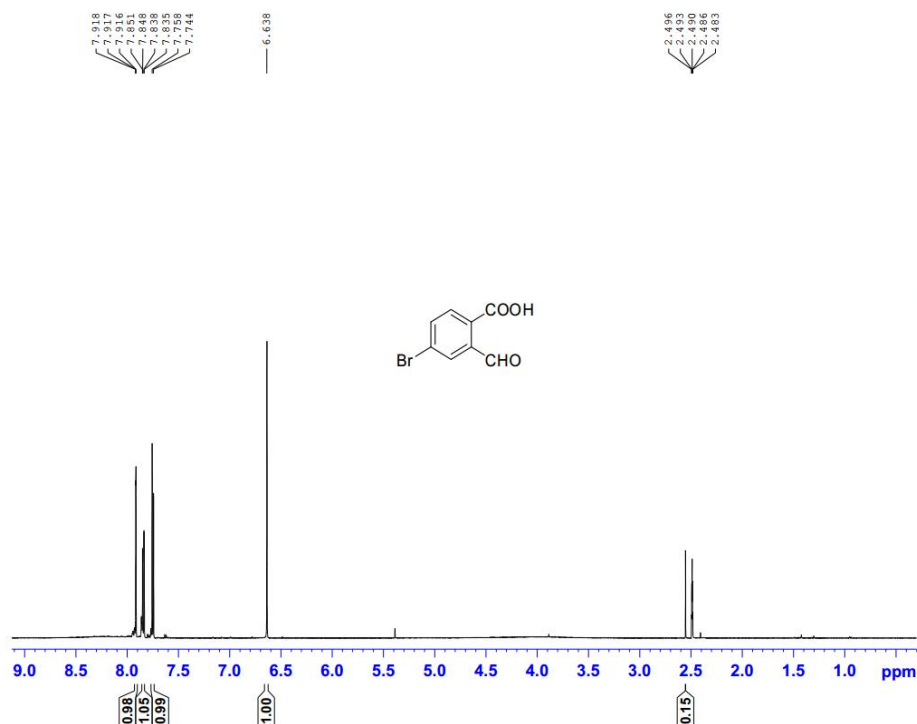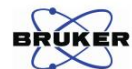

Current Data Parameters  
NAME wsc-0867  
EXPNO 1  
PROCNO 1

F2 - Acquisition Parameters  
Date\_ 20150903  
Time 22.08  
INSTRUM spect  
PROBHD 5 mm PABBO 1H-  
PULPROG zgpg30  
TD 65536  
SOLVENT DMSO  
NS 16  
DS 0  
SWH 12019.230 Hz  
FIDRES 0.183399 Hz  
AQ 2.7263477 sec  
RG 404  
RW 41.600 usec  
DE 6.50 usec  
TE 299.9 K  
D1 1.0000000 sec  
TDO 1

===== CHANNEL f1 =====  
NUC1 13C  
P1 13.70 usec  
PL1 19.34000015 dB

F2 - Processing parameters  
SI 65536  
SF 600.1300126 MHz  
WDW EM  
SSB 0  
LB 0 Hz  
GB 0  
PC 1.00

wsc-0867 C

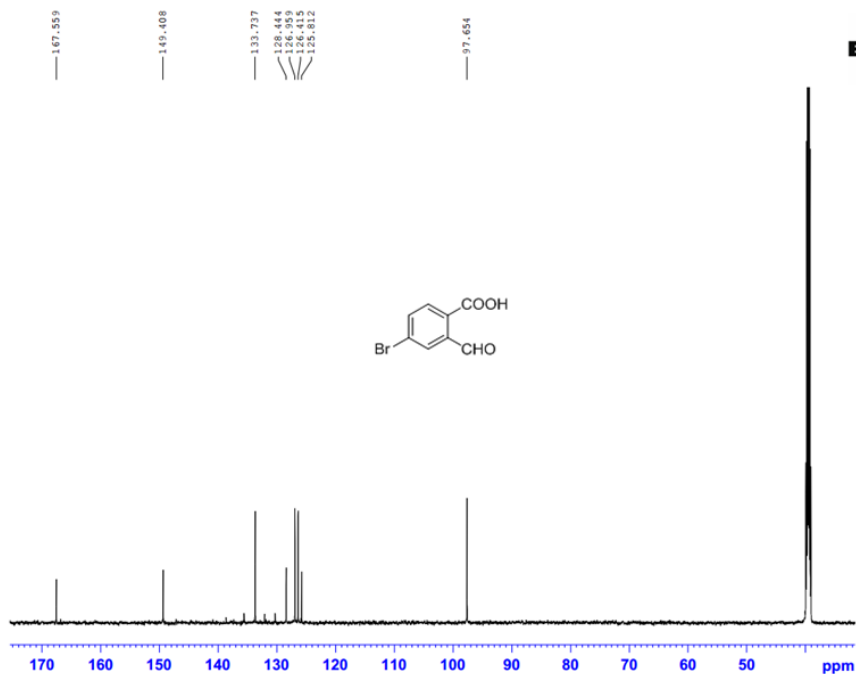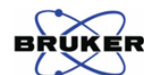



# NMR of compound **2e**

wsc-6Br-CC

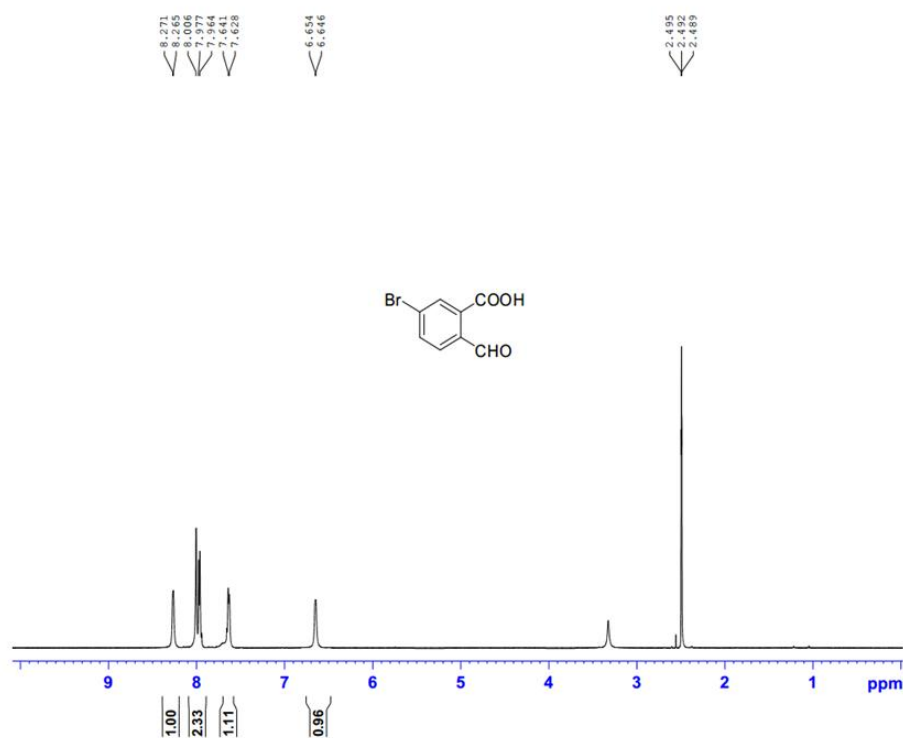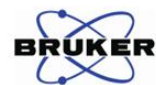

Current Data Parameters  
NAME wsc-6Br-CC  
EXPNO 1  
PROCNO 1

F2 - Acquisition Parameters  
Date\_ 20160526  
Time\_ 10.05  
INSTRUM spect  
PROBHD 5 mm PABBO BB-  
PULPROG zg30  
TD 65536  
SOLVENT DMSO  
NS 16  
DS 0  
SWH 12019.230 Hz  
FIDRES 0.183399 Hz  
AQ 2.7263477 sec  
RG 234  
DM 41.600 usec  
DE 6.50 usec  
TE 298.7 K  
D1 1.00000000 sec  
TD 1

CHANNEL f1 -----  
SF01 600.1329337 MHz  
NUC1 1H  
P1 13.70 usec  
PLW1 19.34000015 W

F2 - Processing parameters  
SI 65536  
SF 600.1300106 MHz  
WDW EM  
SSB 0  
LB 0 Hz  
GB 0  
PC 1.00

wsc-0876second C

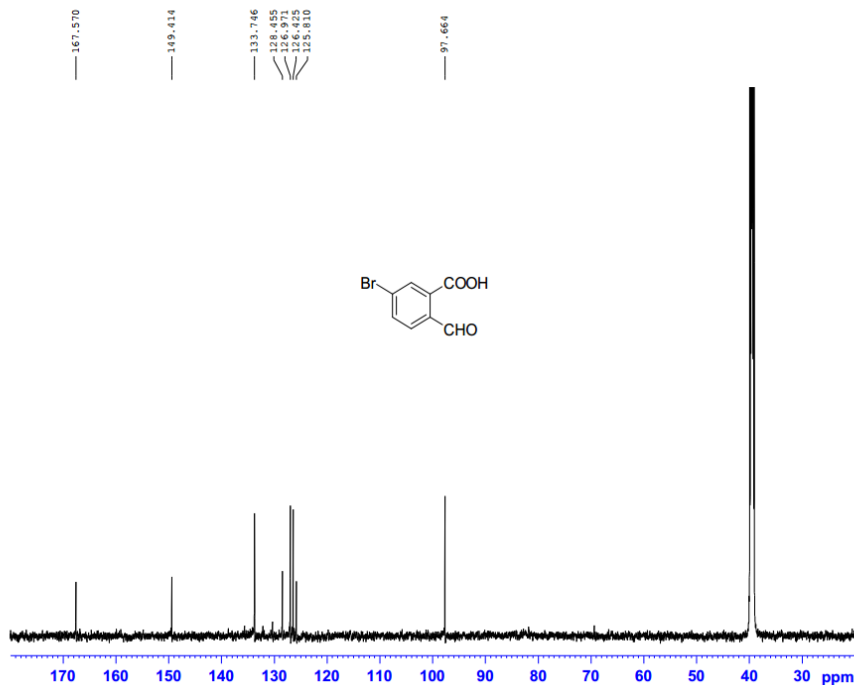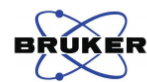

NMR of compound **2g**

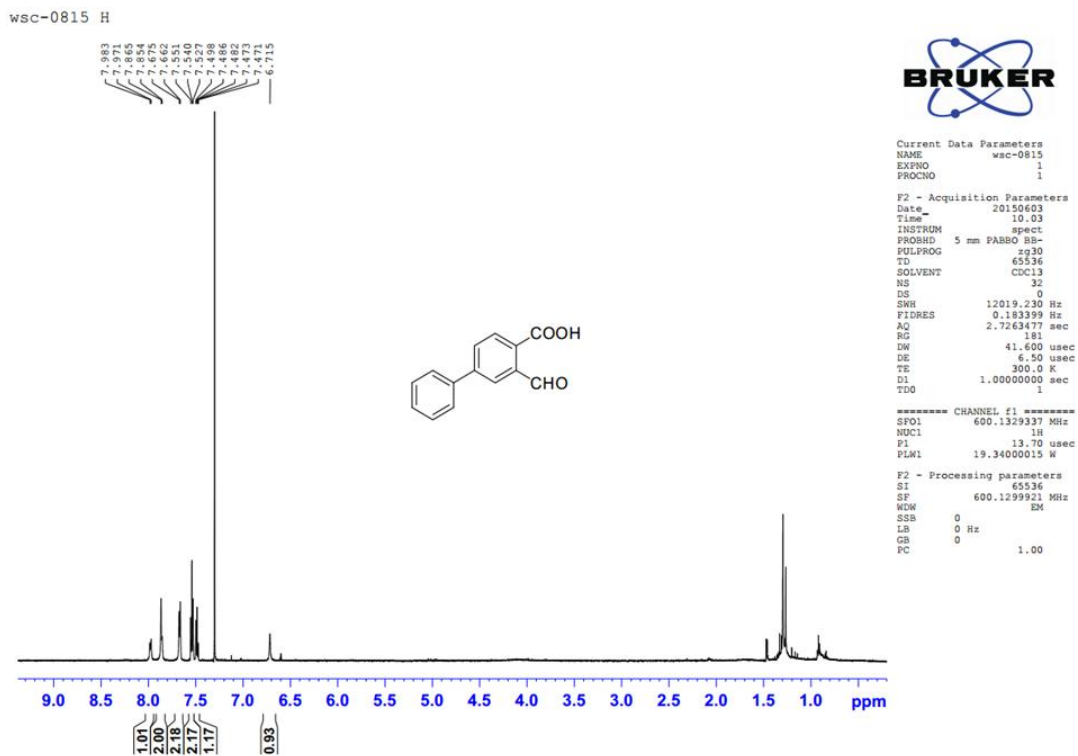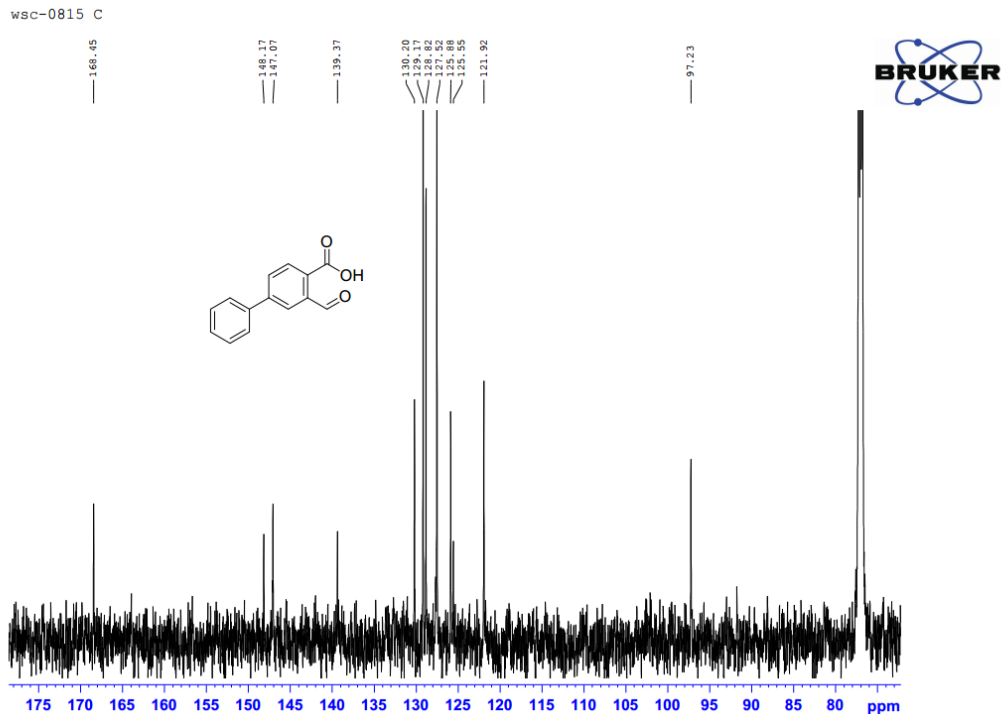

# NMR of compound 2i

wsc-08442new H

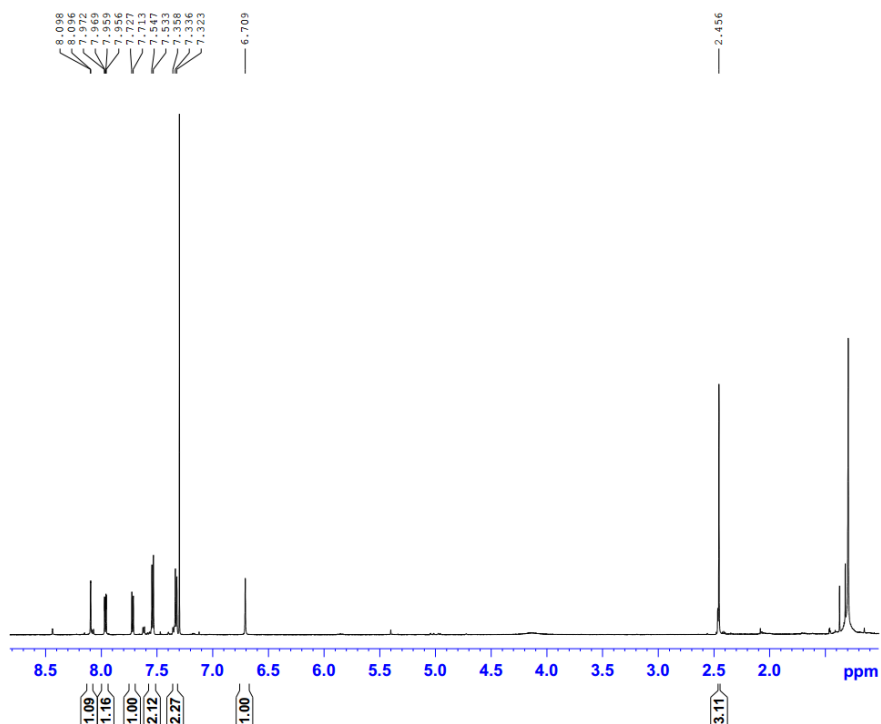

wsc-08442new C

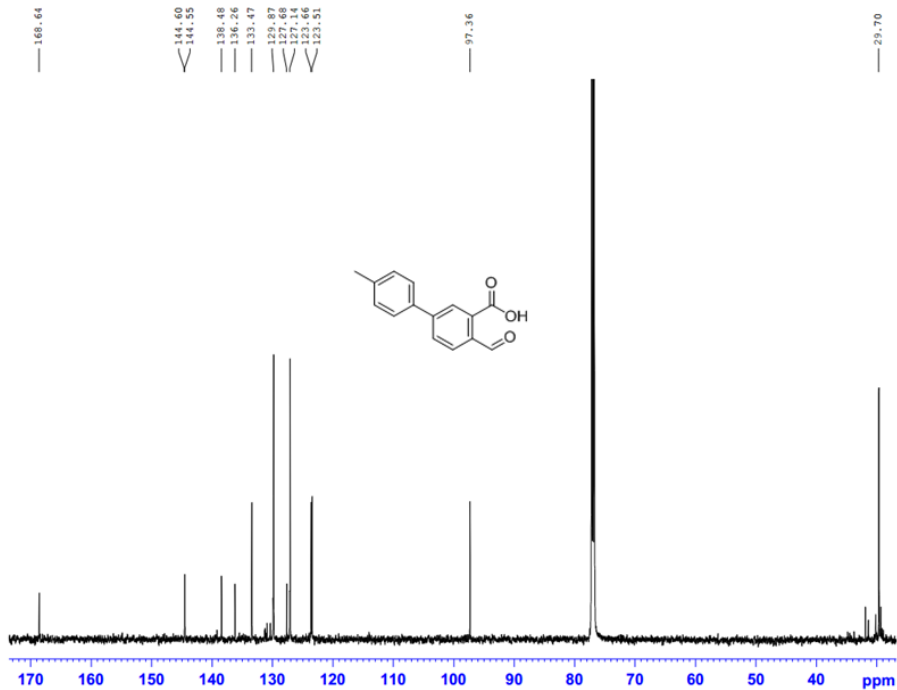

# NMR of compound **2j**

wsc-0866ne

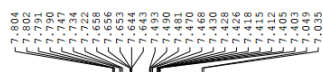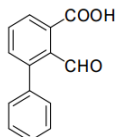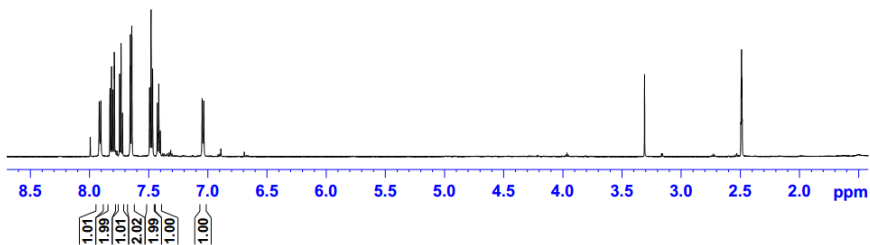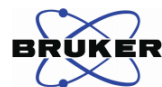

Current Data Parameters  
 NAME wsc-0866new  
 EXPRO 1  
 PROCNO 1

F2 - Acquisition Parameters  
 Date 20150904  
 Time 7.01  
 INSTRUM spect  
 PROHD 5 mm PABBO BB-  
 PULPROG zg30  
 TD 65536  
 SOLVENT DMSO  
 NS 16  
 DS 0  
 SWH 12019.230 Hz  
 FIDRES 0.183399 Hz  
 AQ 2.7263477 sec  
 RG 256  
 DW 41.600 usec  
 DE 6.50 usec  
 TE 299.5 K  
 D1 1.00000000 sec  
 TDO

===== CHANNEL f1 =====  
 SF01 600.1332000 MHz  
 NUC1 1H  
 F1 13.70 usec  
 PLW1 19.34000015 W

F2 - Processing parameters  
 SI 65536  
 SF 600.1300121 MHz  
 WDW EM  
 SSB 0  
 LB 0 Hz  
 GB 0  
 PC 1.00

wsc-0866new

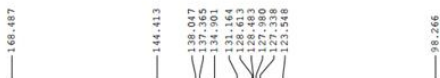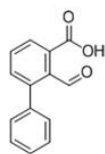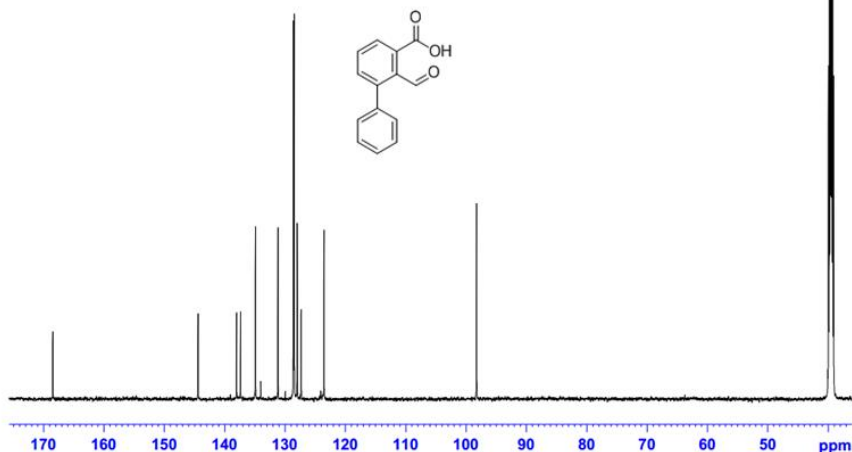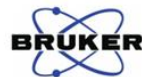

# NMR of compound **2k**

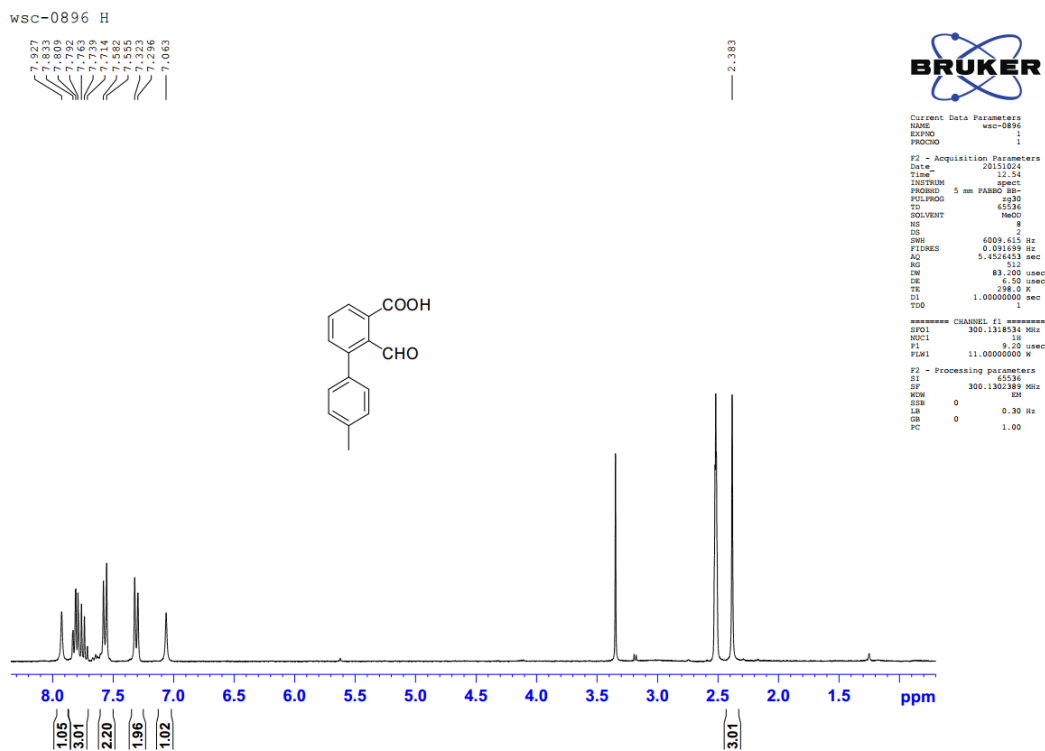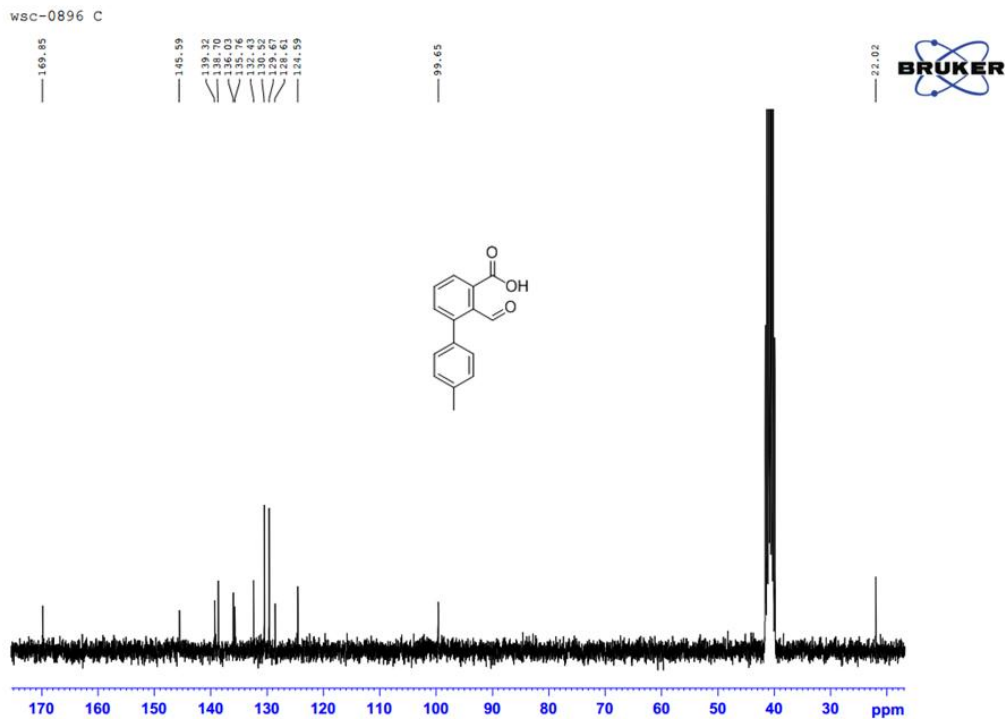

# NMR of compound **2l**

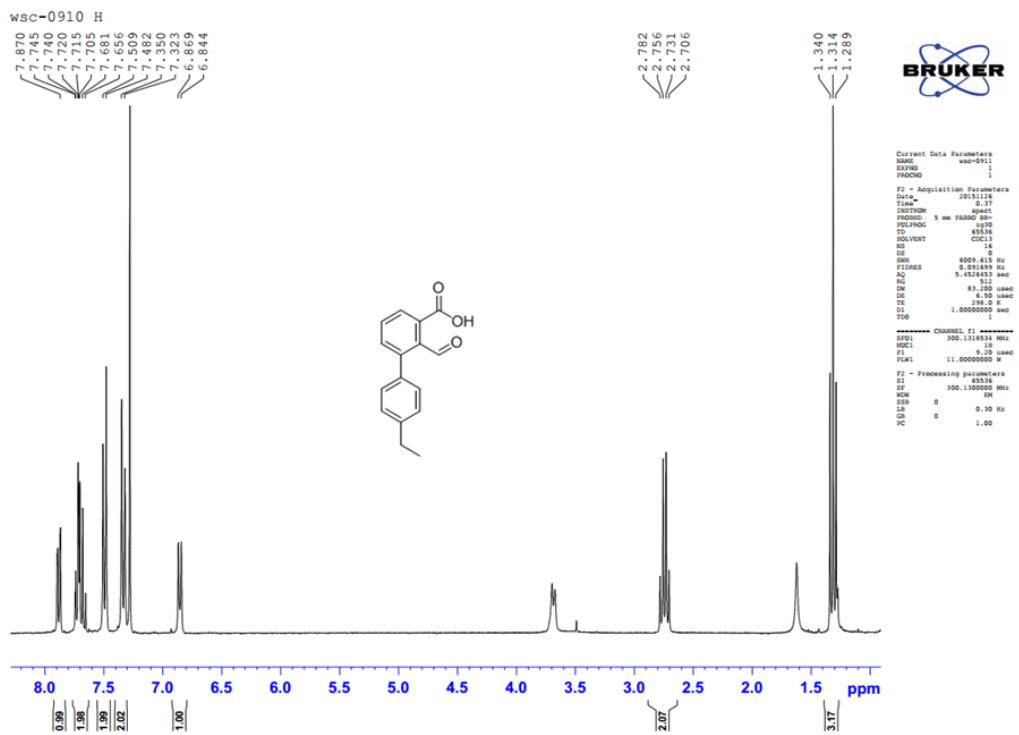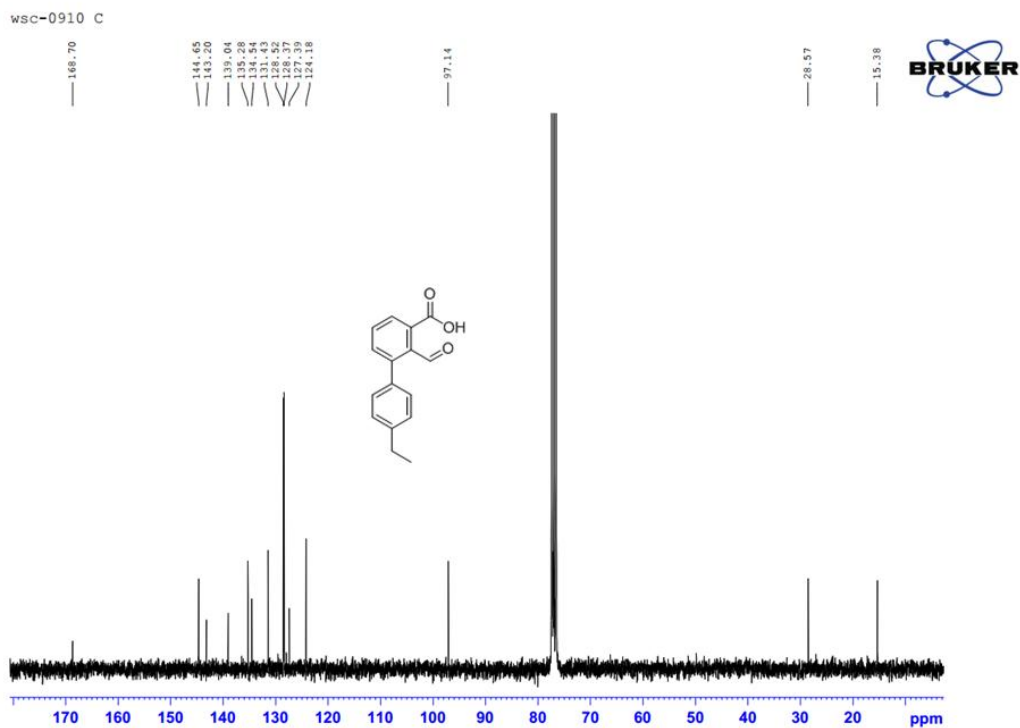

# NMR of compound **2m**

wsc-cc-2m

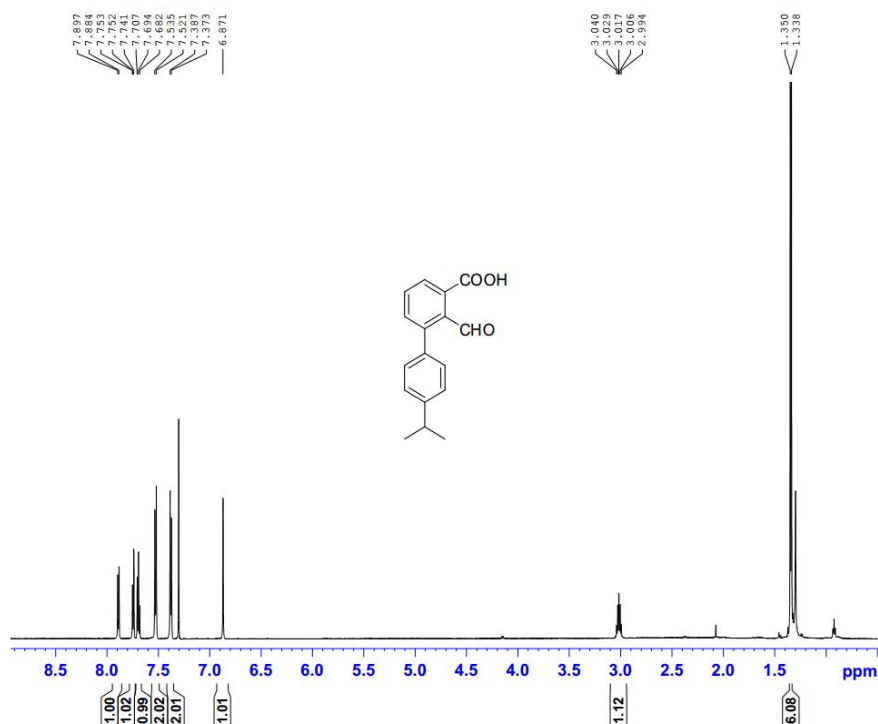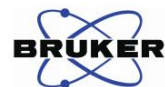

Current Data Parameters  
NAME wsc-cc-3m  
EXPNO 1  
PROCNO 1

F2 - Acquisition Parameters  
Date\_ 20160522  
Time 12.41  
INSTRUM spect  
PROBHD 5 mm PABBO BB-  
PULPROG zg30  
TD 18516  
SOLVENT CDCl3  
NS 16  
DS 0  
SWH 9259.259 Hz  
FIDRES 0.500068 Hz  
AQ 0.9999140 sec  
RG 228  
DW 54.000 usec  
DE 6.50 usec  
TE 296.7 K  
D1 1.00000000 sec  
TDO 1

===== CHANNEL f1 =====  
SP01 600.1325000 MHz  
NUC1 1H  
P1 13.70 usec  
PLW1 19.34000015 W

F2 - Processing parameters  
SI 65536  
SF 600.1299907 MHz  
WDW EM  
SSB 0  
LB 0 Hz  
GB 0  
PC 1.00

wsc-cc-2m

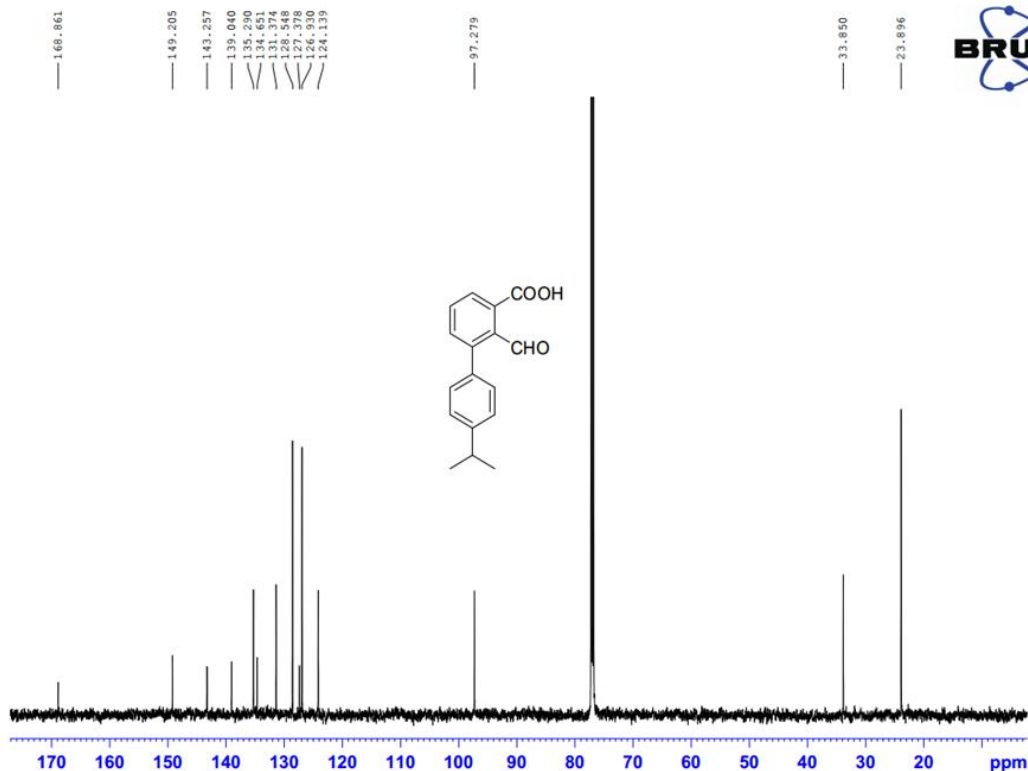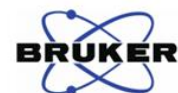

# NMR of compound **2n**

wsc-cc-2n H

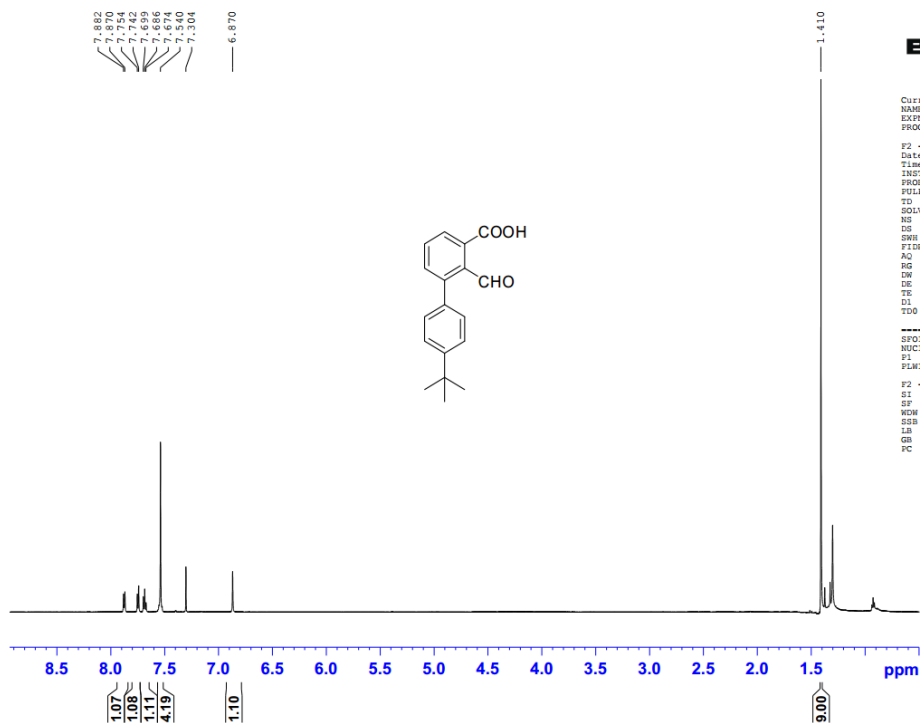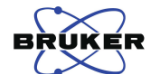

Current Data Parameters  
NAME wsc-cc-2n  
EXPNO 1  
PROCNO 1

F2 - Acquisition Parameters  
Date\_ 20160511  
Time 20.03  
INSTRUM spect  
PROBHD 5 mm PABBO BB-  
PULPROG zg30  
TD 183.6  
SOLVENT CDCl3  
NS 16  
DS 0  
SWH 9259.259 Hz  
FIDRES 0.500068 Hz  
AQ 0.9999140 sec  
RG 101  
DW 54.000 usec  
DE 6.50 usec  
TE 296.6 K  
D1 1.00000000 sec  
TD0 1

CHANNEL f1  
SFO1 600.1325000 MHz  
NUC1 13  
P1 13.70 usec  
PL1 19.34000015 W

F2 - Processing parameters  
SI 653.6  
SF 600.1299907 MHz  
WOW 2M  
SBB 0  
LA 0 Hz  
GB 0  
PC 1.00

wsc-0919 C

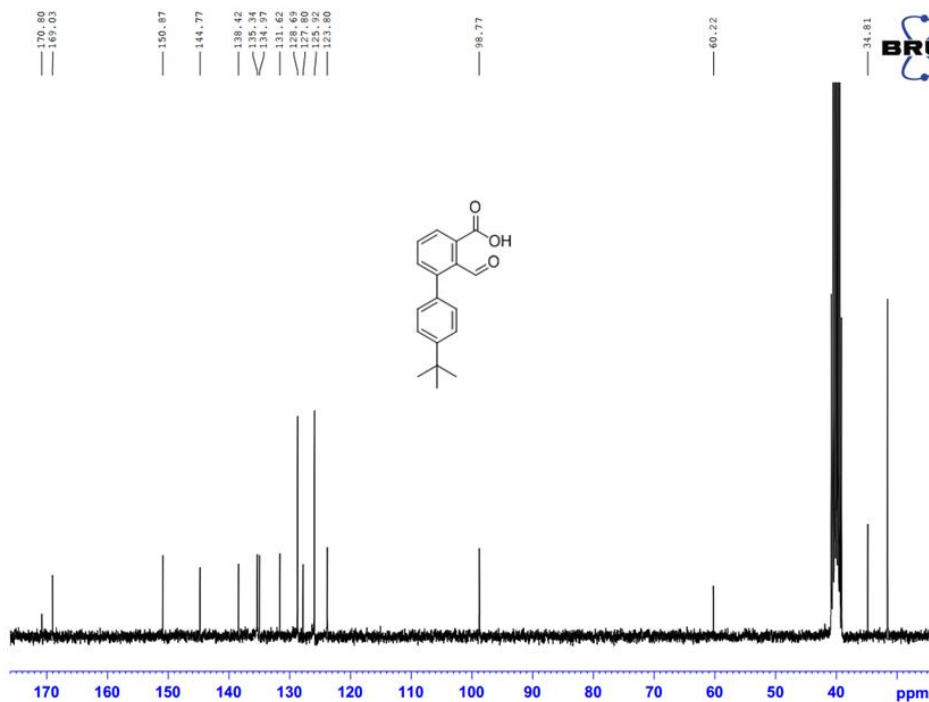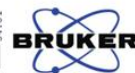



## NMR of compound 2o

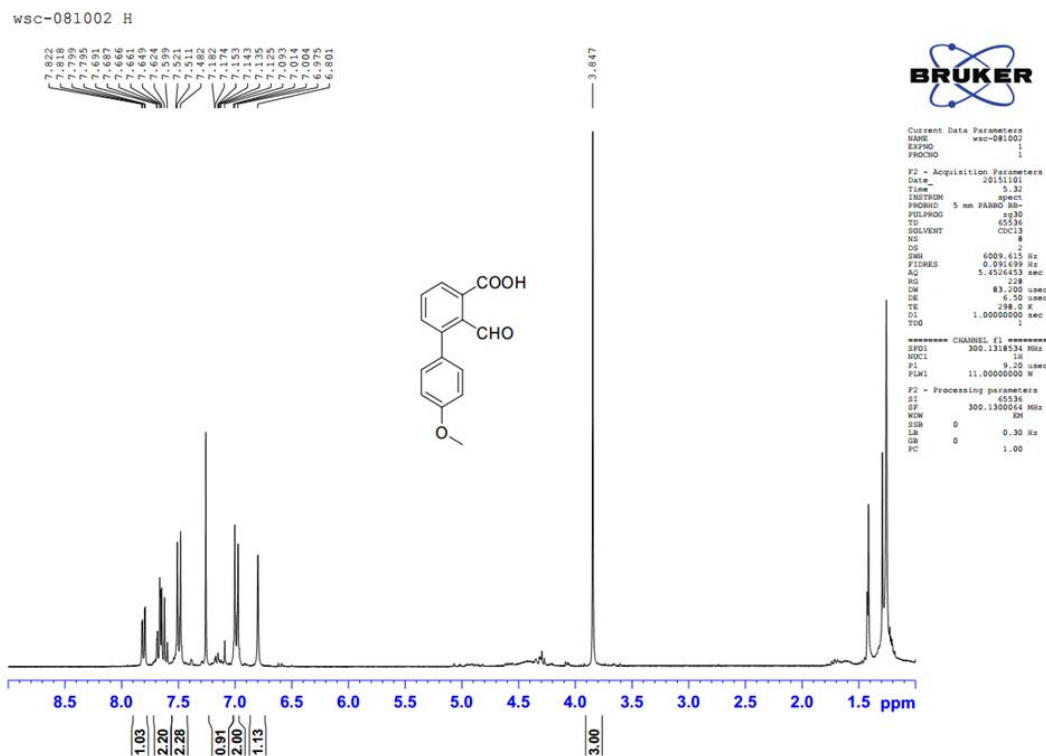

## NMR of compound 2p

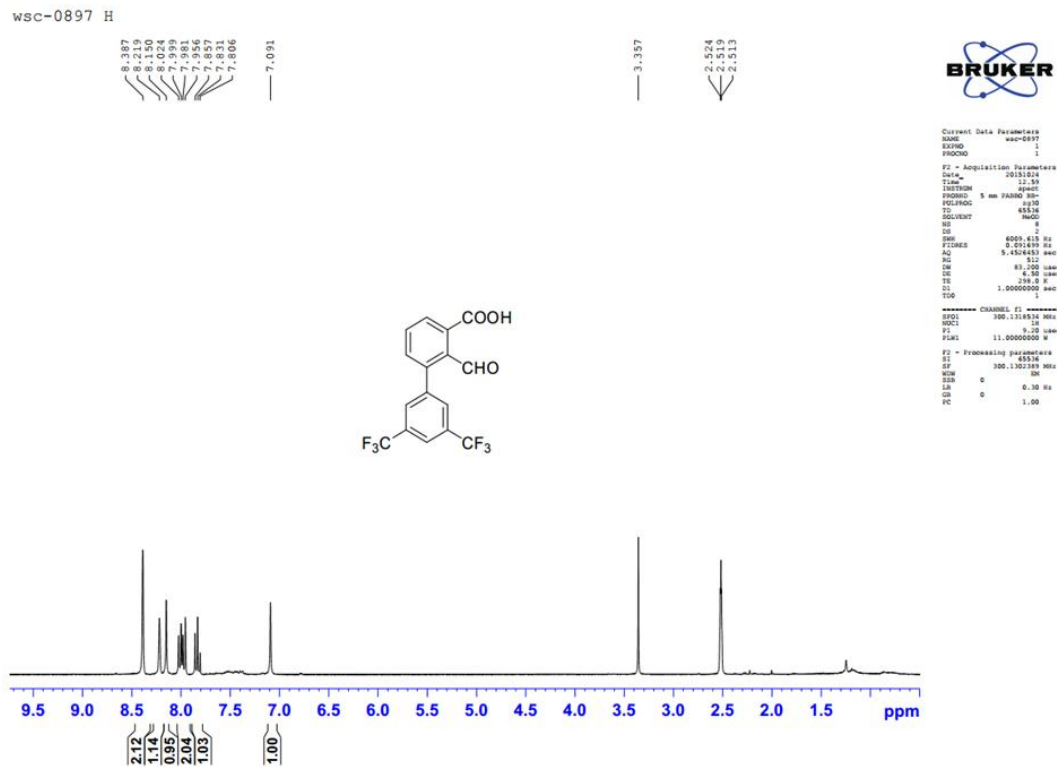

wsc-0897 C

169.43

146.19

141.16

136.80

136.08

132.75

132.10

130.72

128.73

126.35

99.47

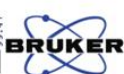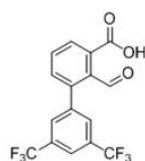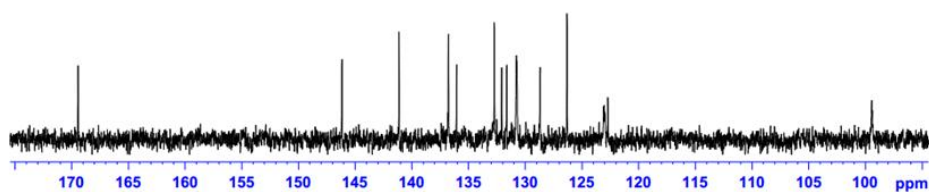

## NMR of compound 2q

wsc-0928 H

7.858  
7.856  
7.846  
7.844  
7.706  
7.705  
7.692  
7.664  
7.651  
7.648  
7.465  
7.461  
7.451  
7.447  
7.289  
6.823  
6.817

2.658  
2.655  
2.632

1.721  
1.709  
1.696  
1.671  
1.659

0.993  
0.980  
0.968

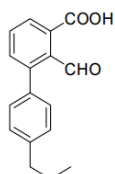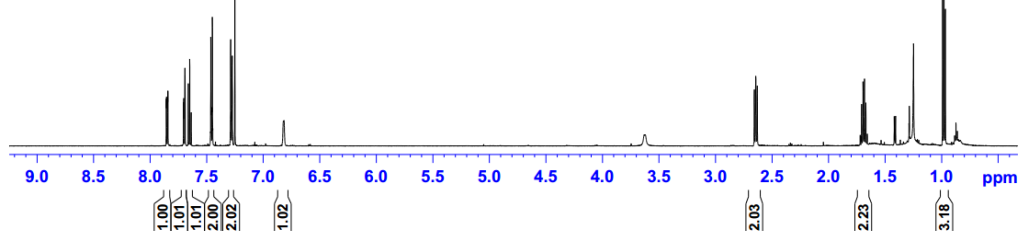

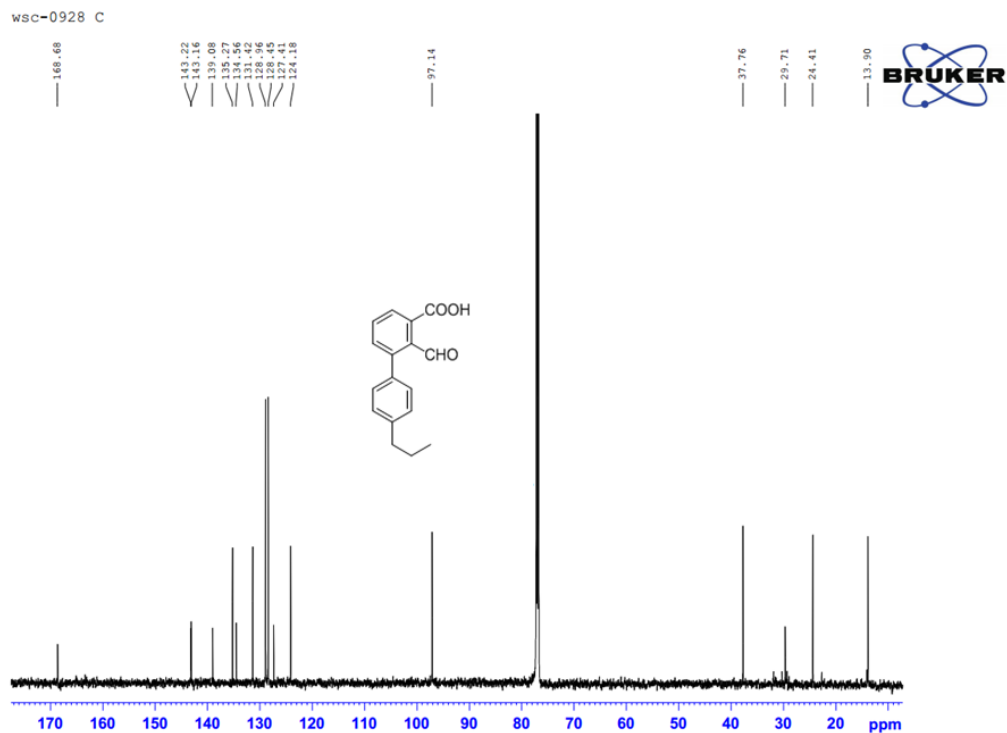

## NMR of compound 2r

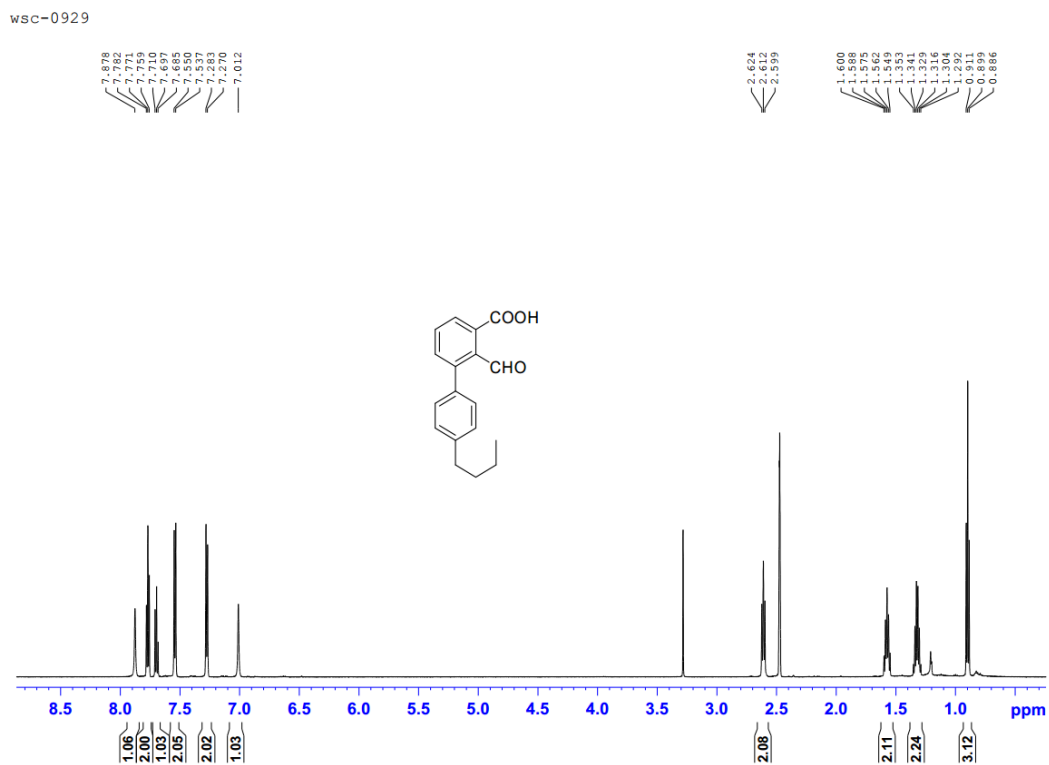

wsc-0929 C

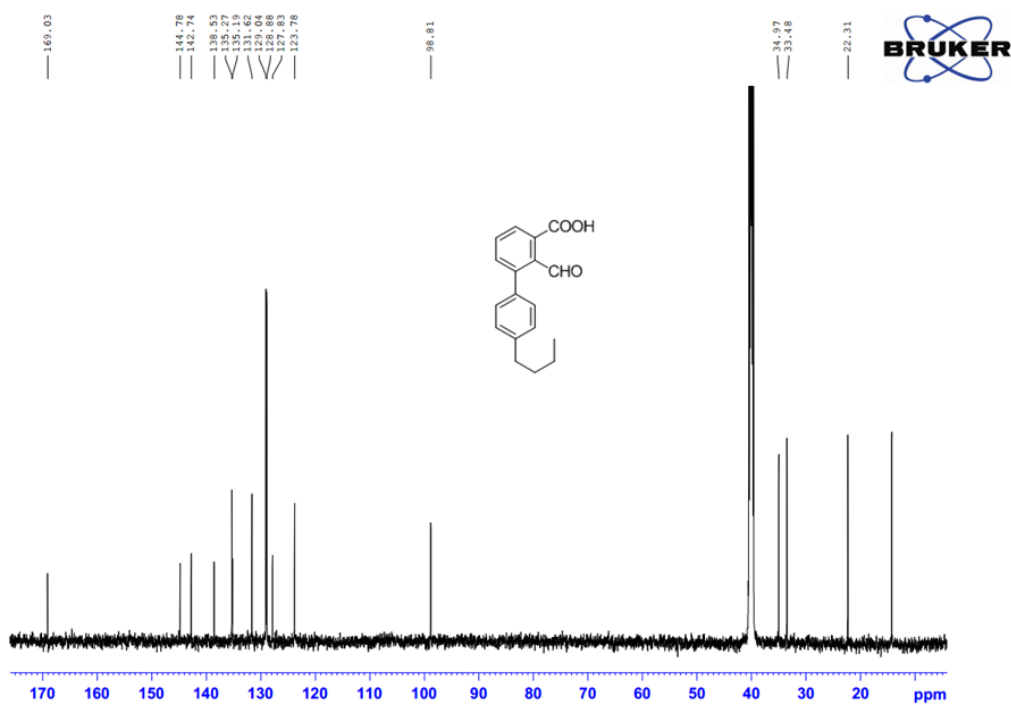

## NMR of compound 2s

wsc-0930 H

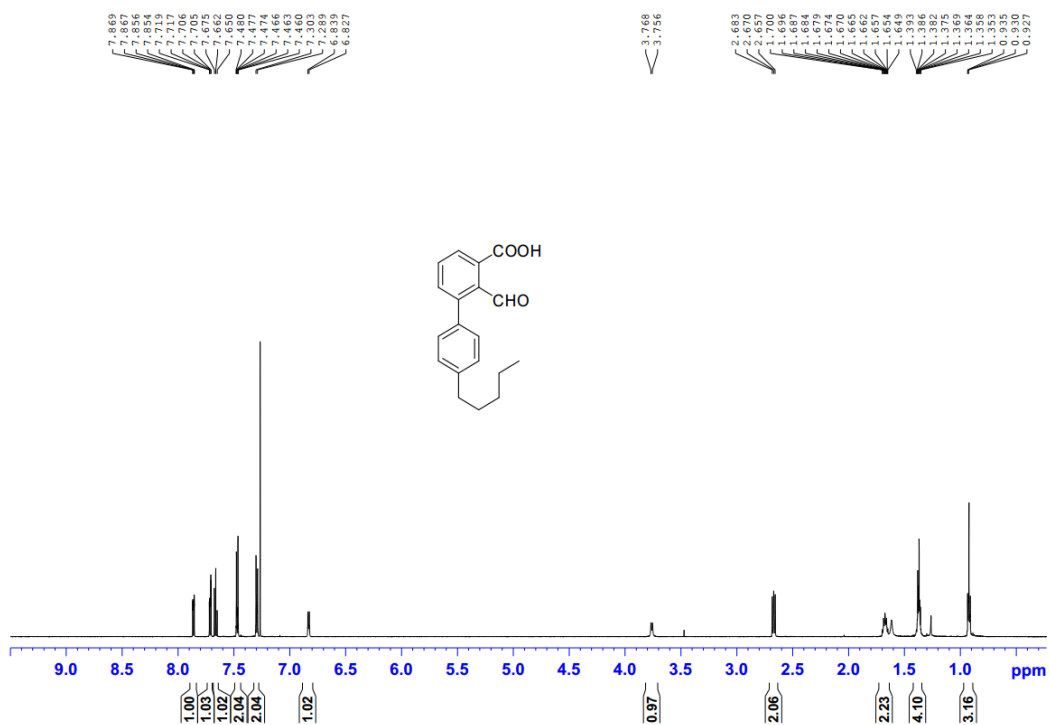

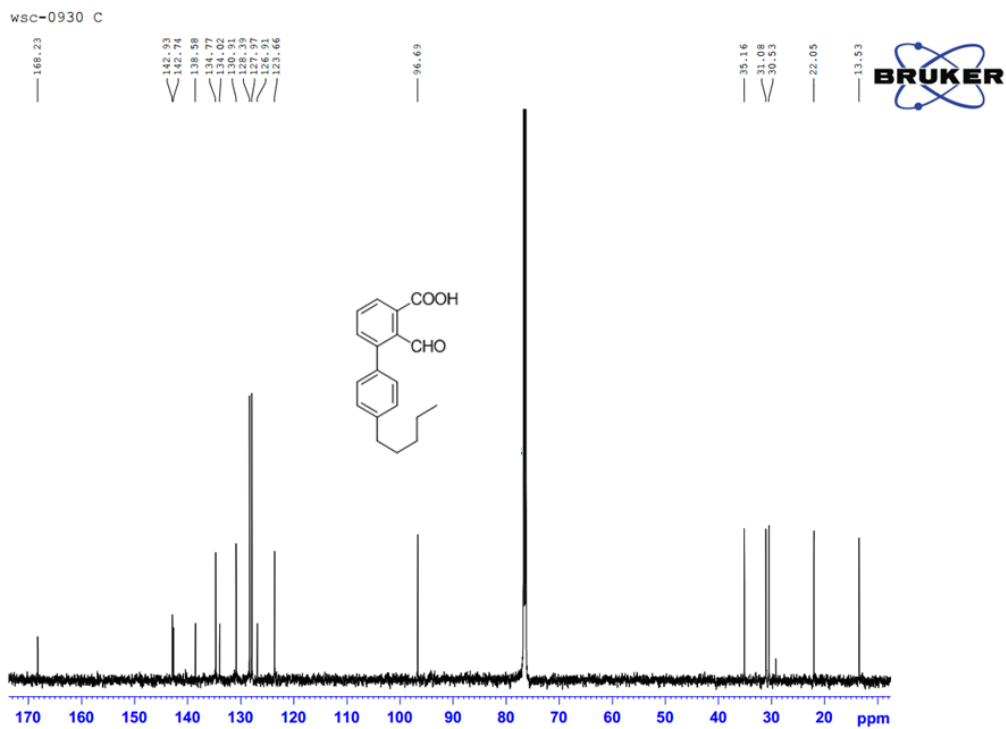

NMR of compound 2t

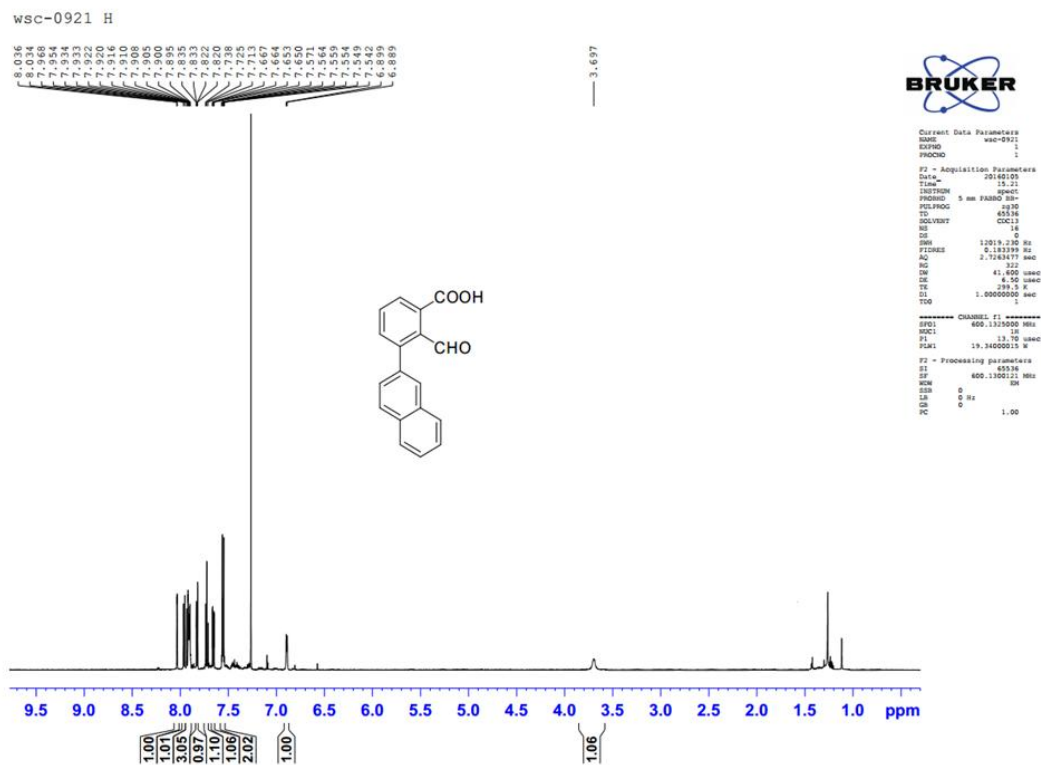

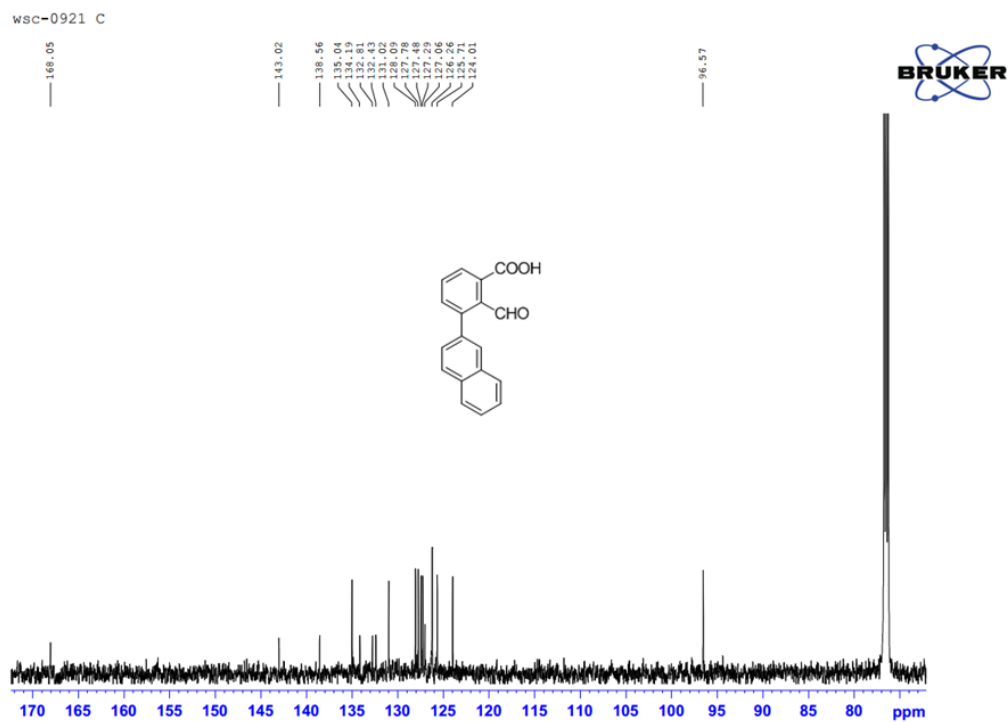

## NMR of compound 3a

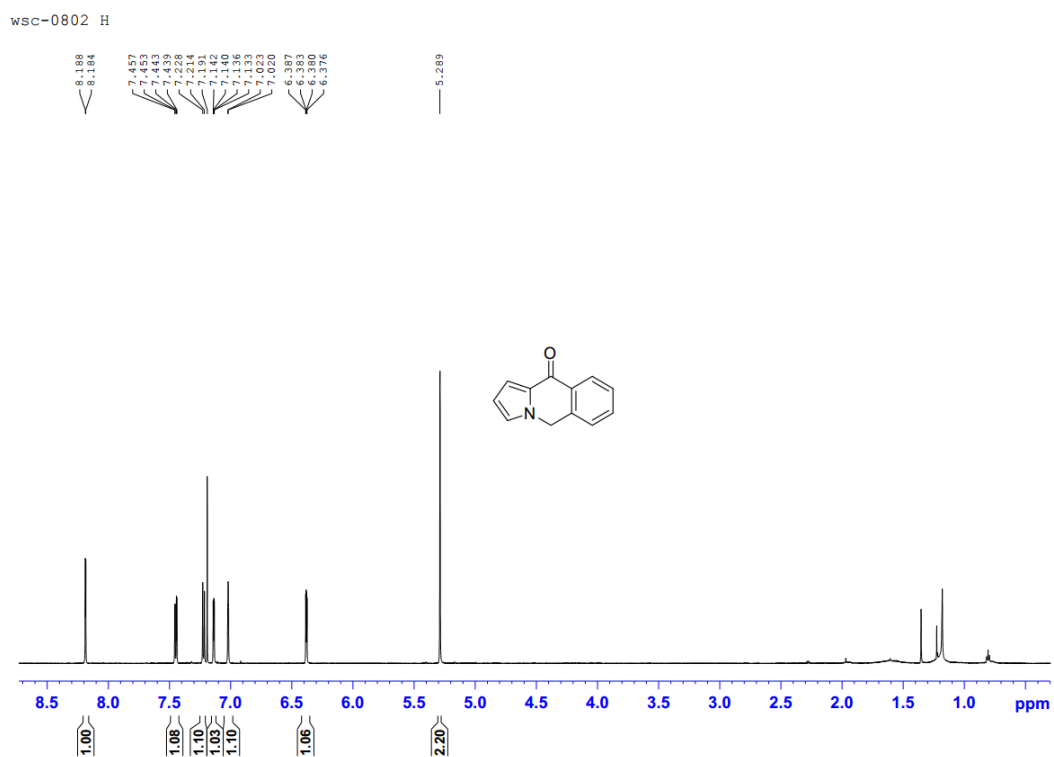

wsc-0802 C

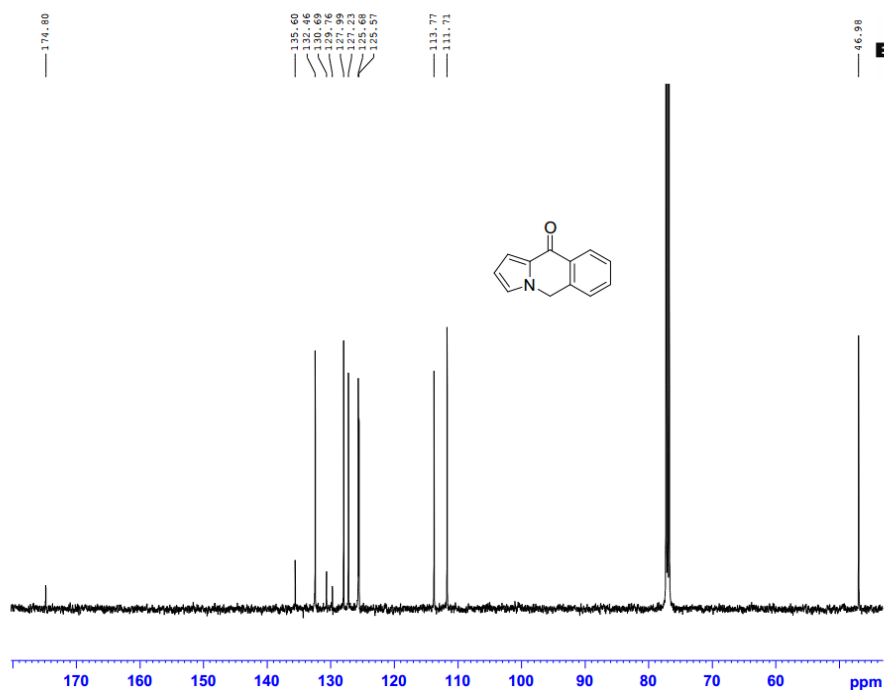

## NMR of compound 3b

wsc-0804 H

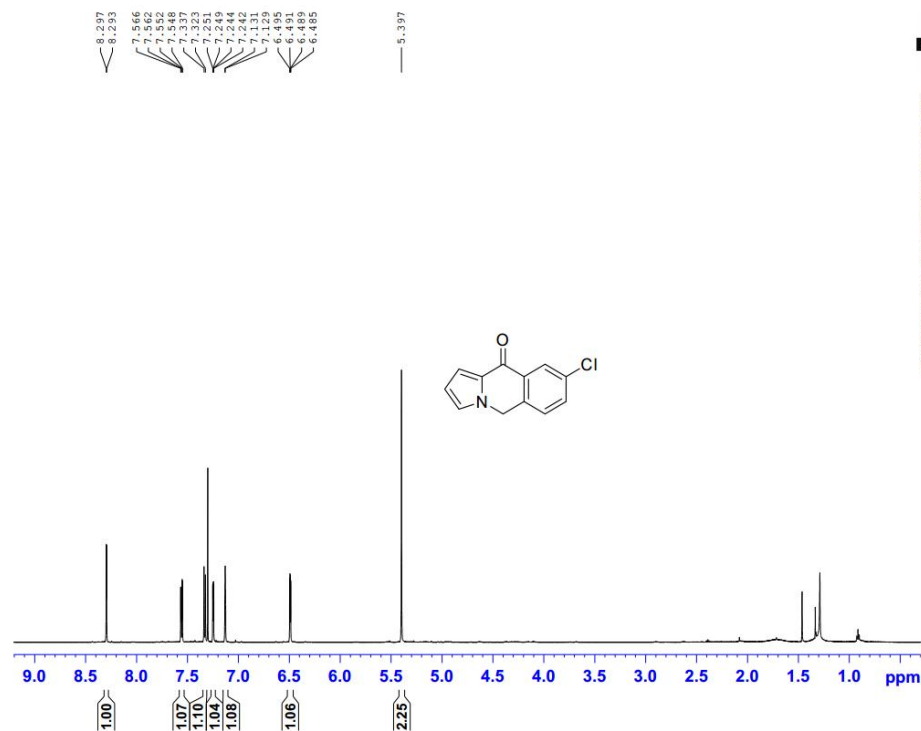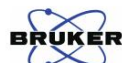

Current Data Parameters  
NAME wsc-0804  
DATE 1  
PROCNO 1

F2 - Acquisition Parameters  
Date 20100529  
Time 16.59  
INSTRUM spect  
PROBHD 5 mm HBBBO BB-  
PULPROG zgpg30  
TD 65536  
SOLVENT CDCl3  
NS 92  
DS 9  
SWH 12019.230 Hz  
FIDRES 0.213378 Hz  
AQ 2.7243477 sec  
RG 181  
WM 41.400 umsec  
DE 6.50 umsec  
TE 296.3 K  
D1 1.00000000 sec  
D06 1

===== CHANNEL f1 =====  
NUC1 13C  
P1 19.34000013 sec  
PL1 0.00

F2 - Processing parameters  
SI 32768  
SF 600.1259921 MHz  
WDW EM  
SSB 0  
LB 0 Hz  
GB 0  
PC 1.00

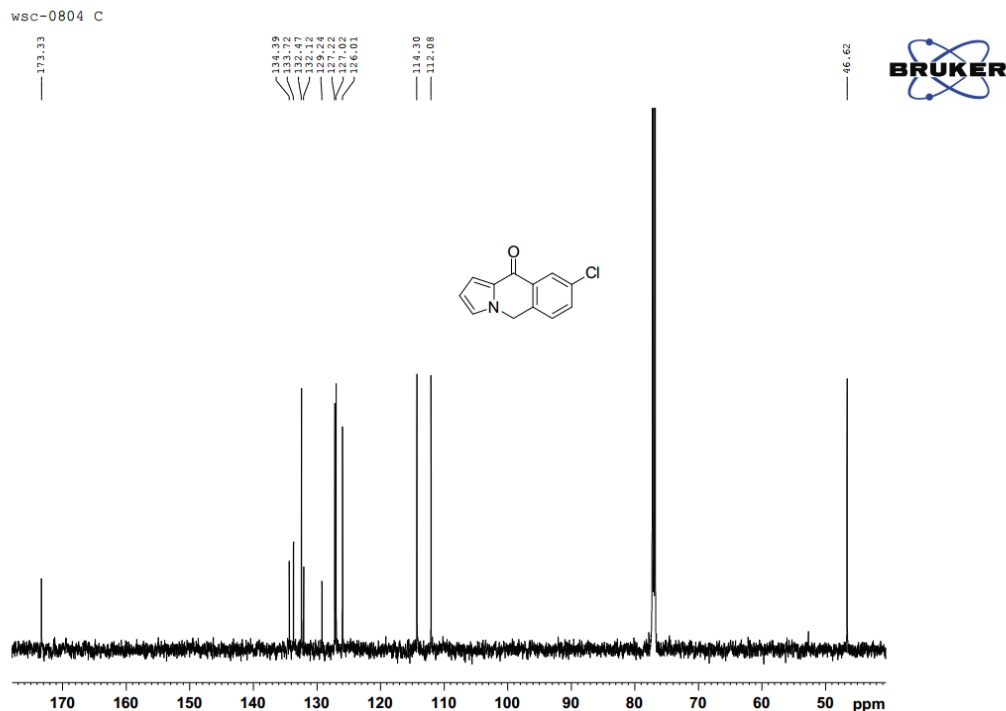

# NMR of compound 3c

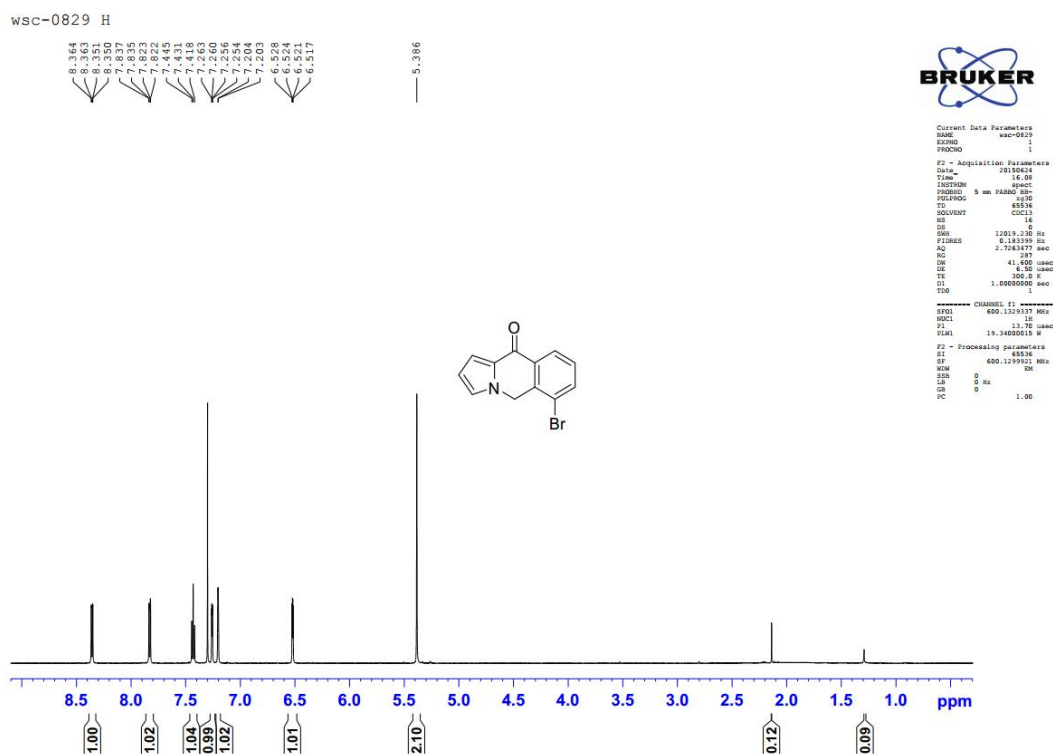



wsc-0829 C

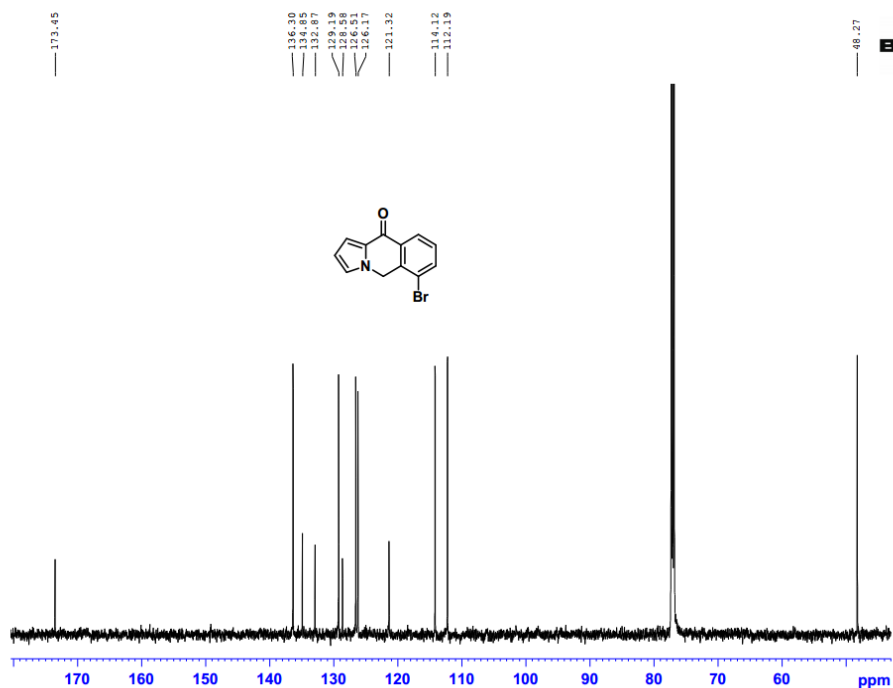

## NMR of compound 3d

wsc-0924 pure H

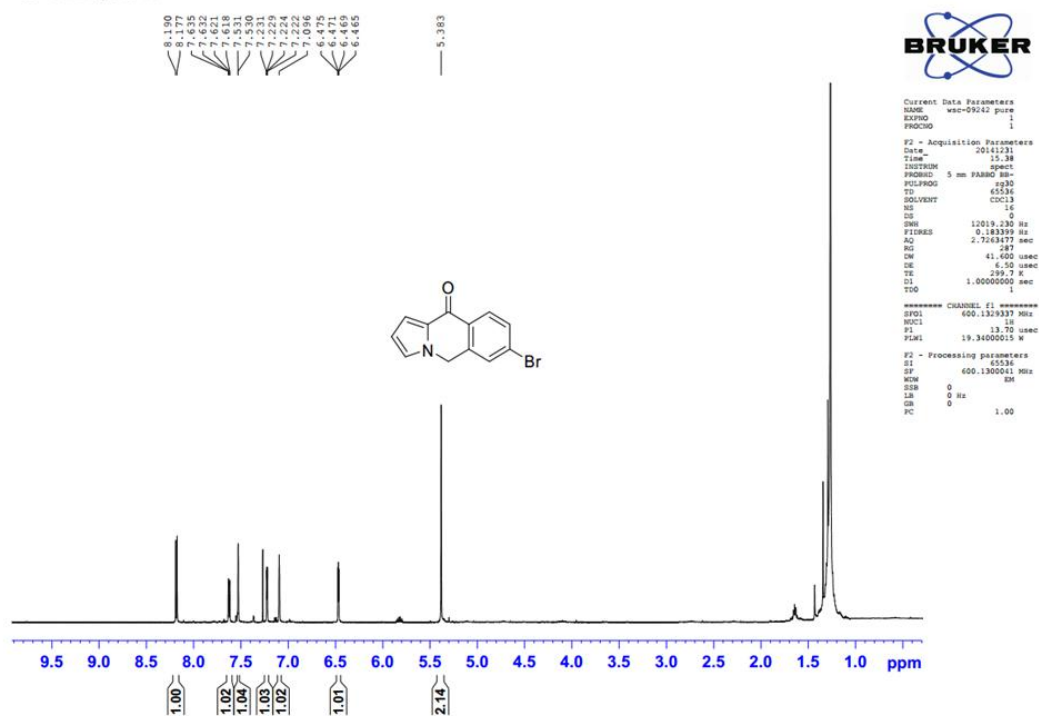

wsc-0924 pure H

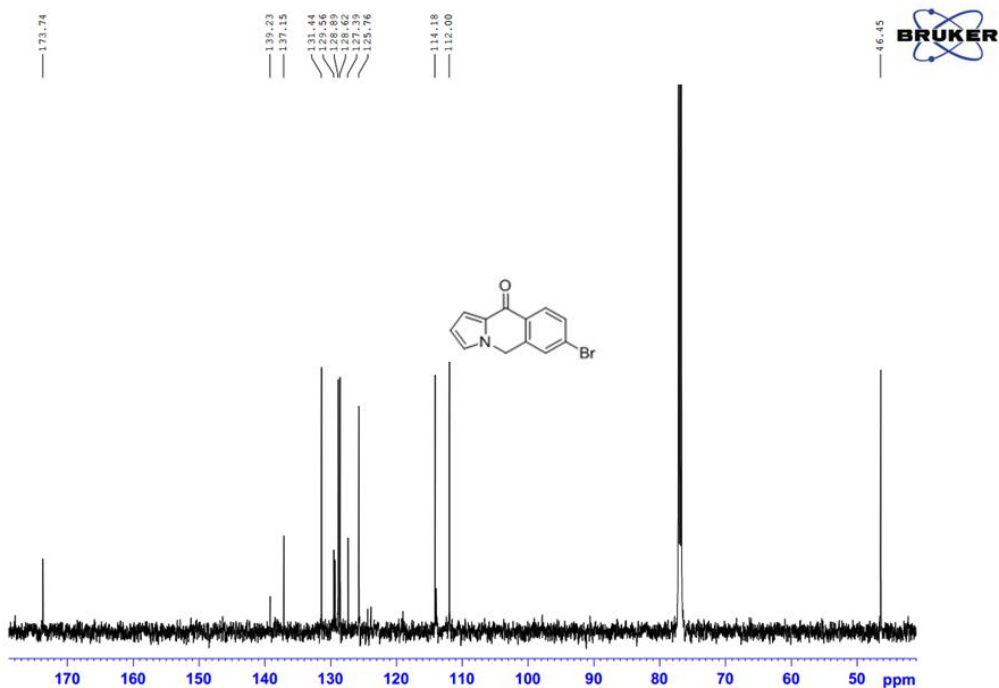

## NMR of compound 3e

wsc-0925 pure1 H

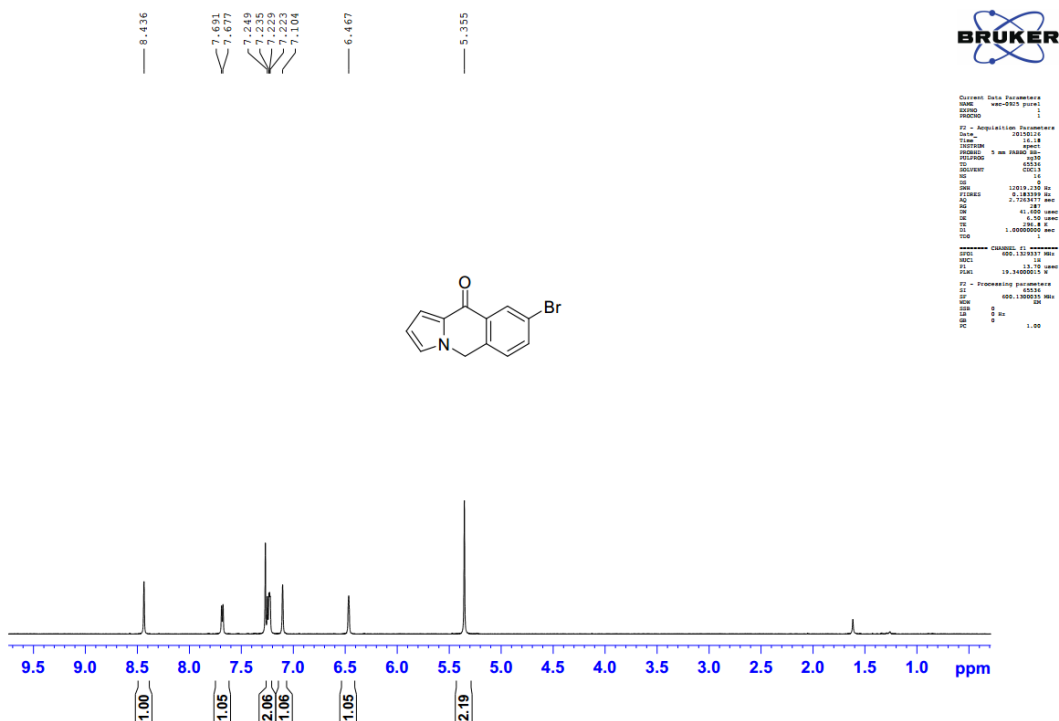

wsc-0925pure 1 C

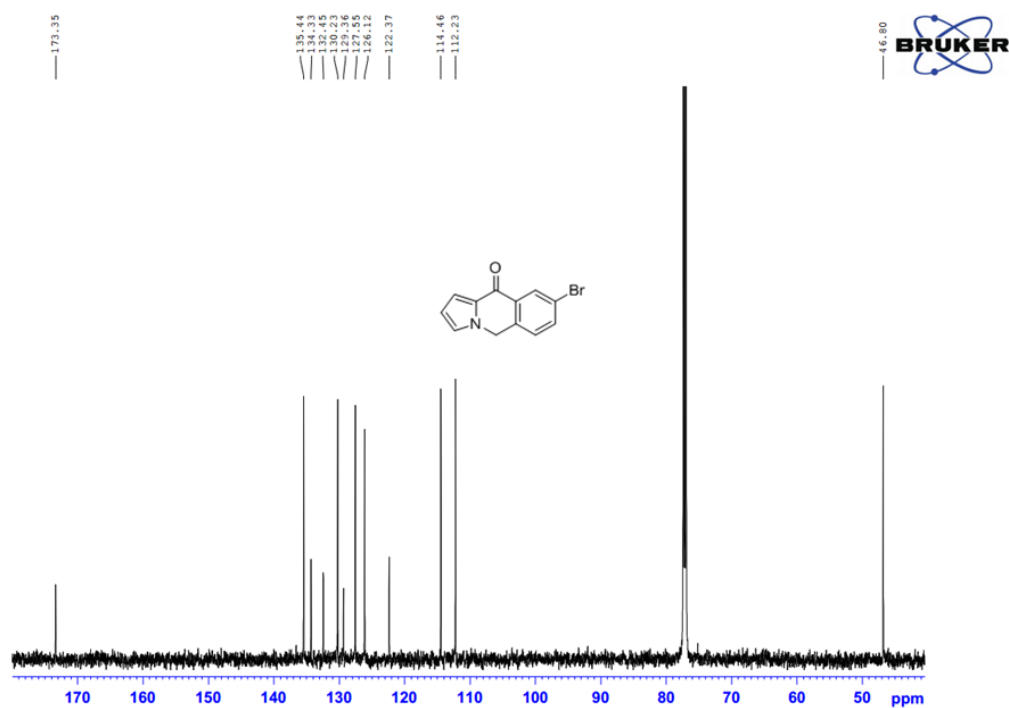

## NMR of compound 3f

wsc-0817 H

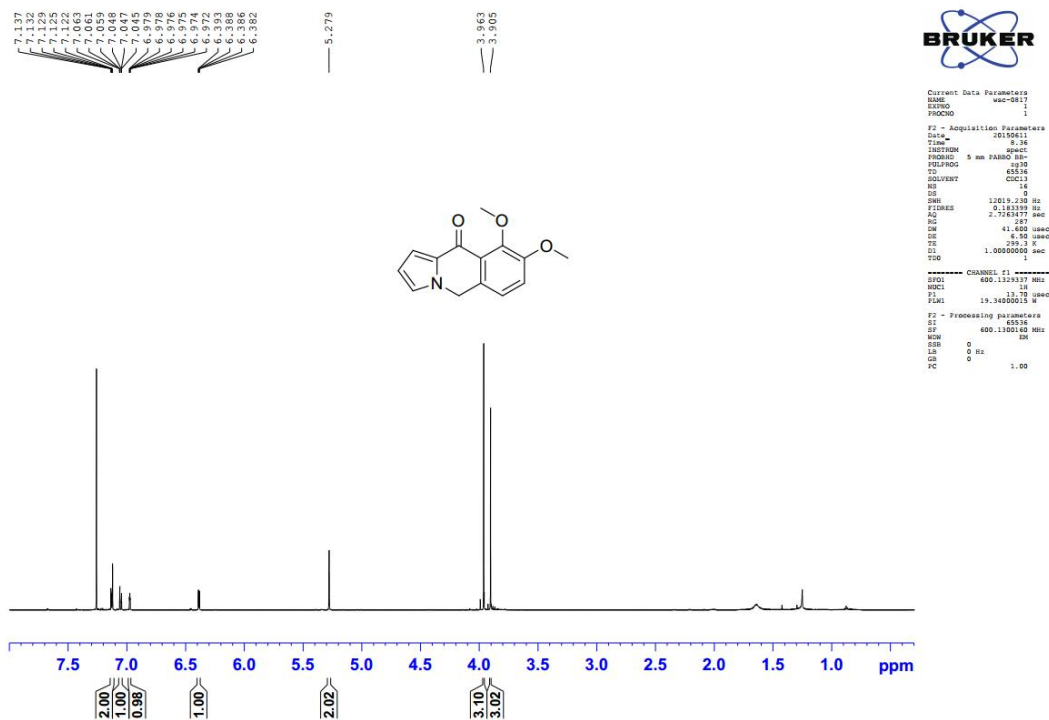

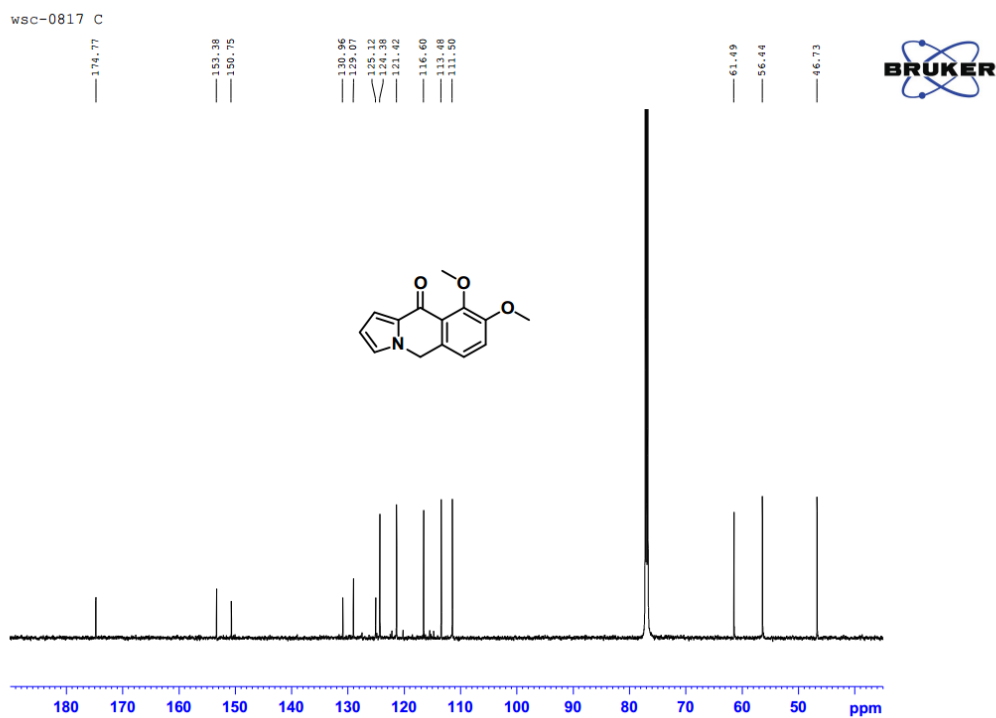

## NMR of compound 3g

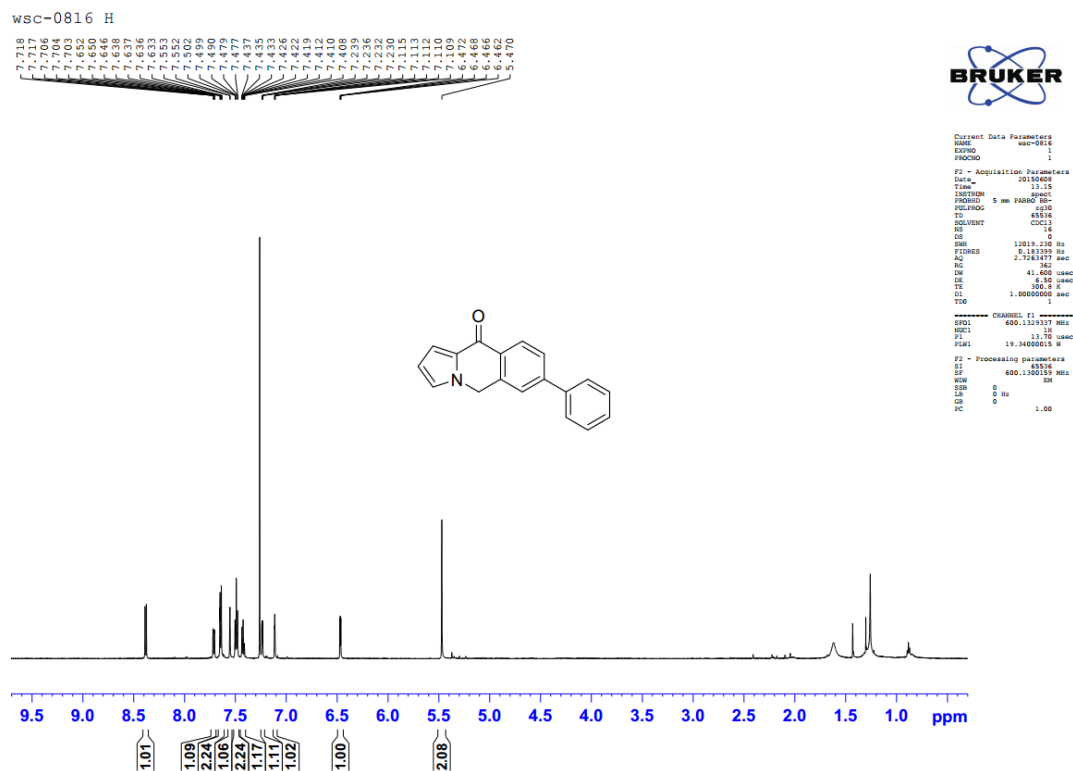

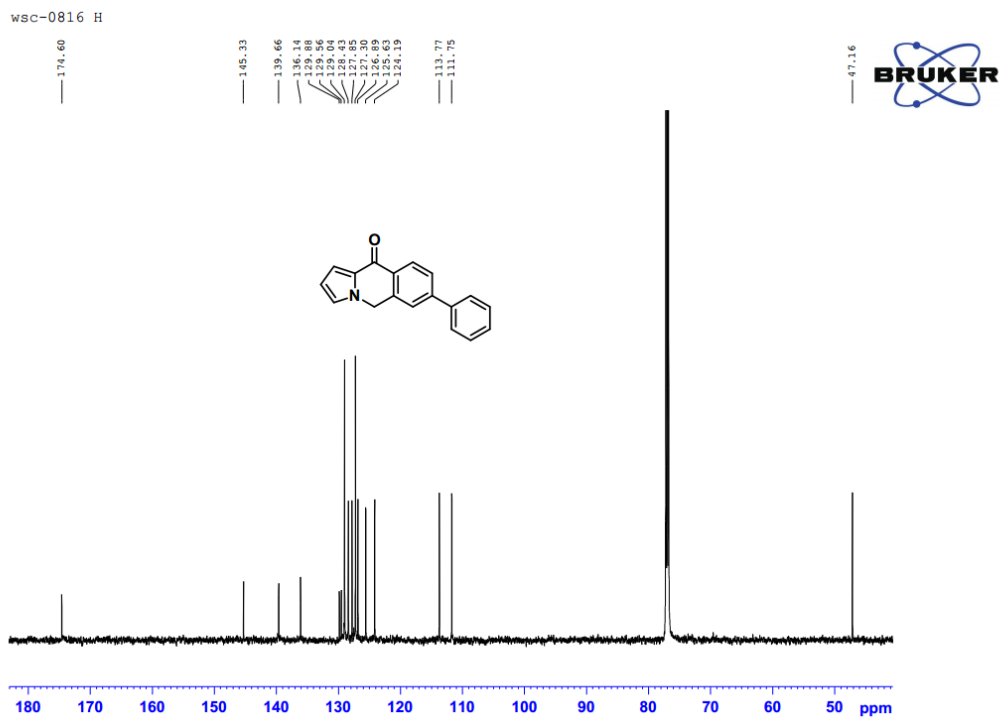

### NMR of compound 3h

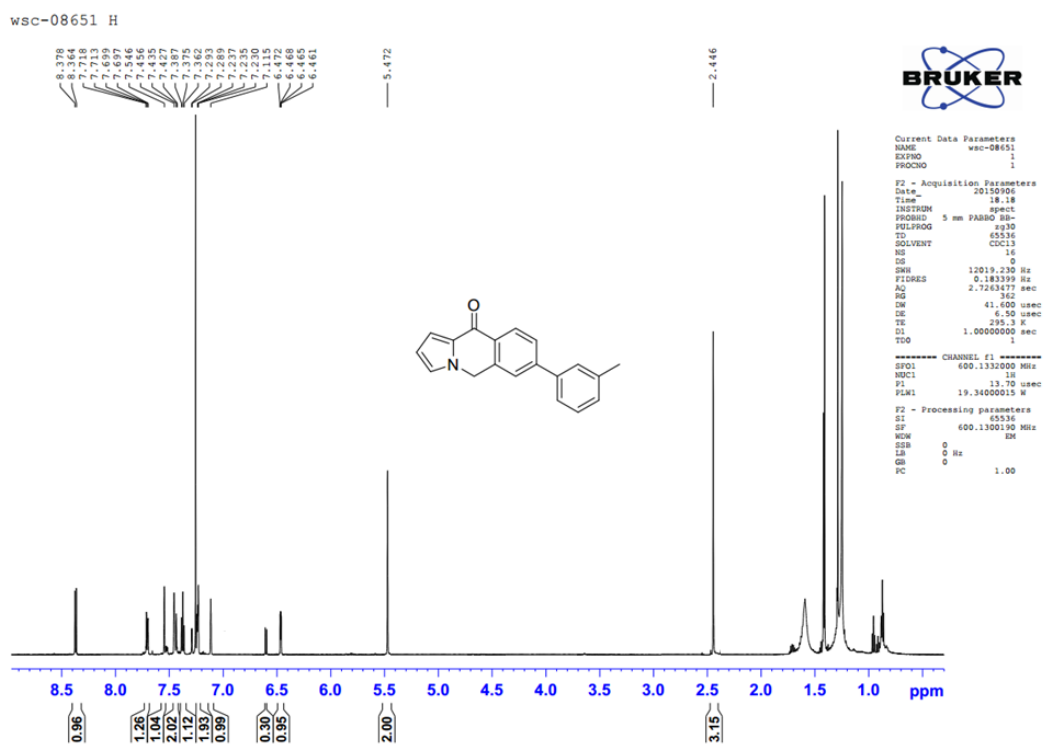

wsc-08651 C

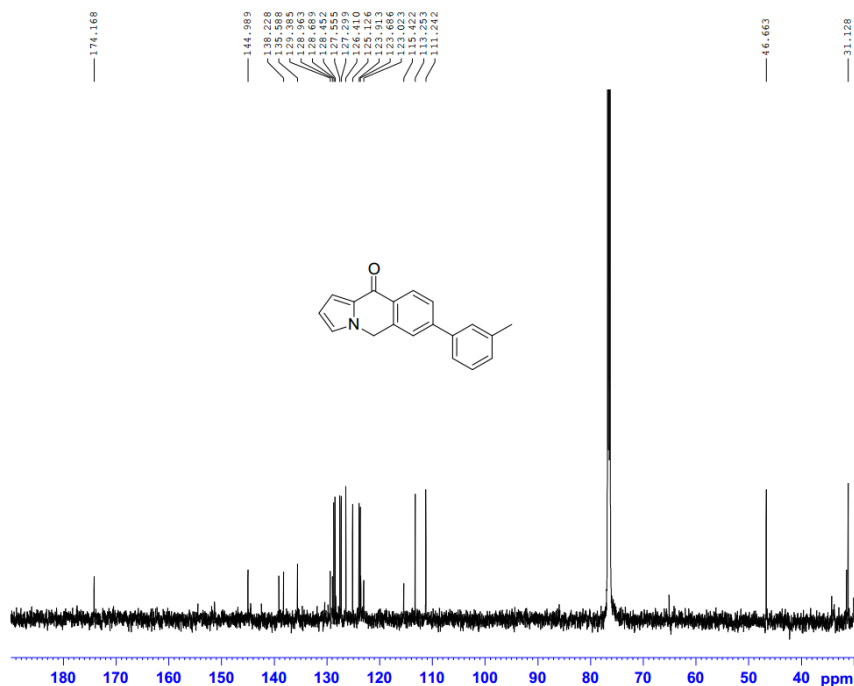

## NMR of compound 3i

wsc-cc-3i H

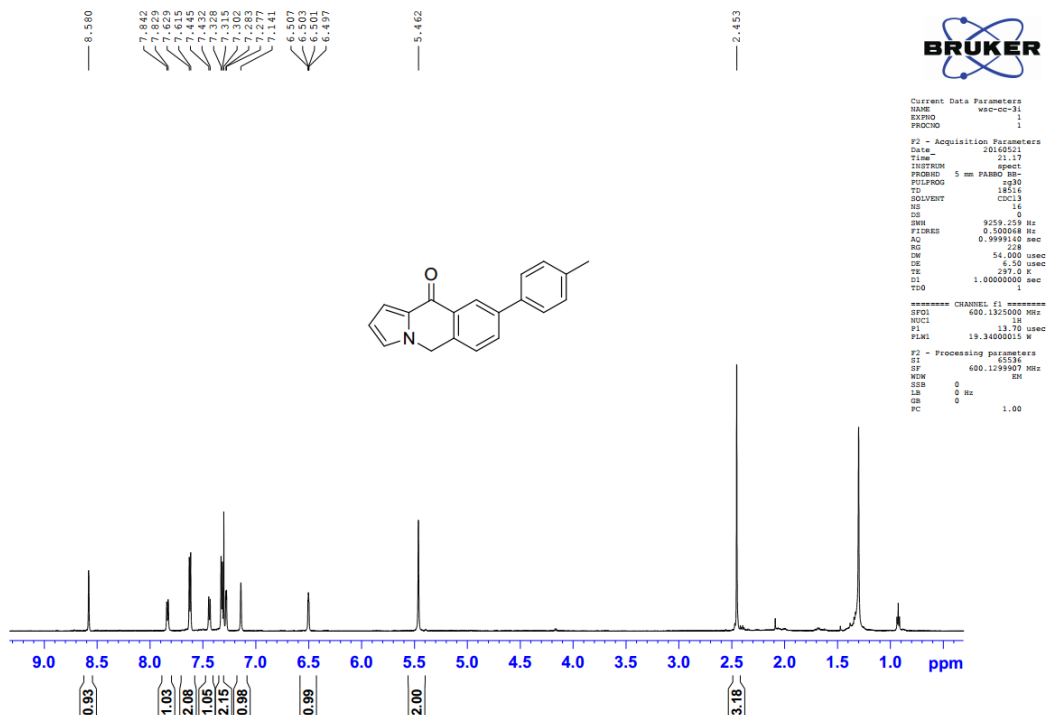

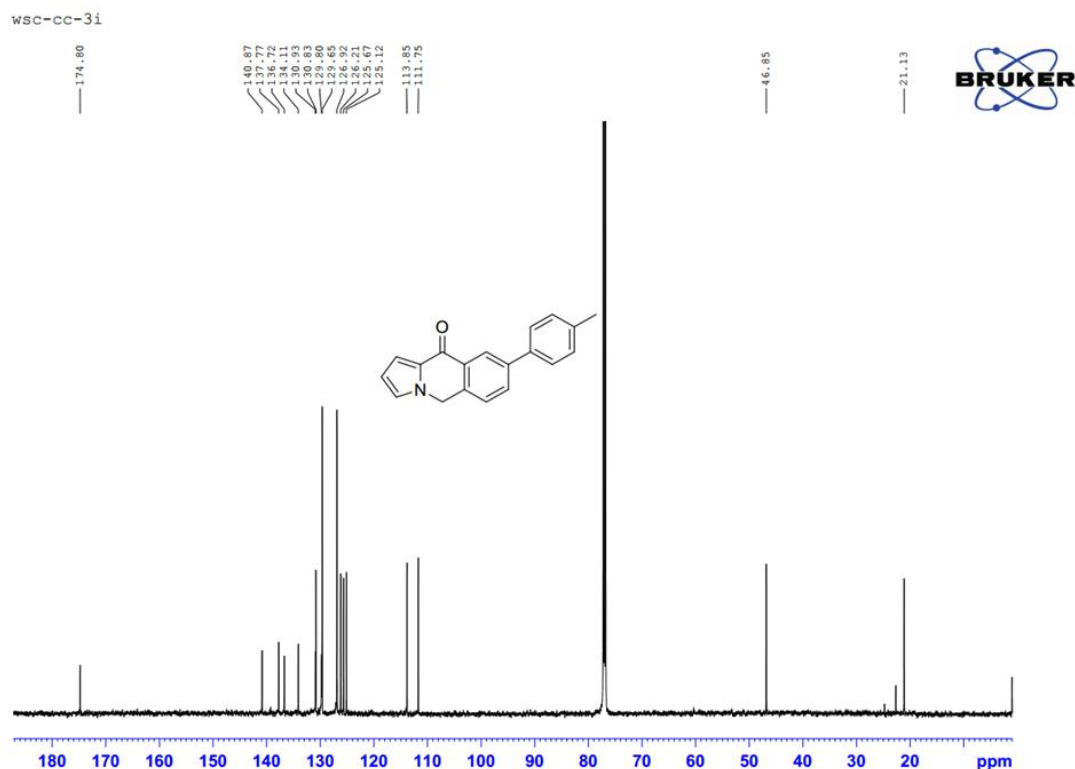

## NMR of compound 3j

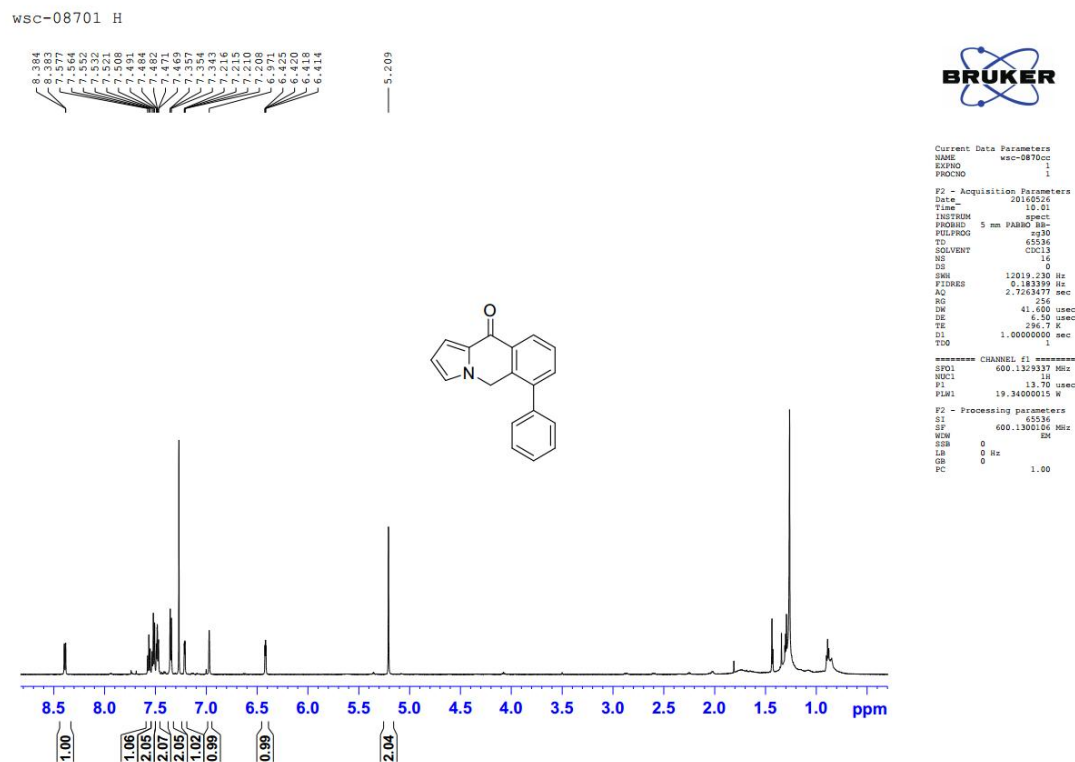

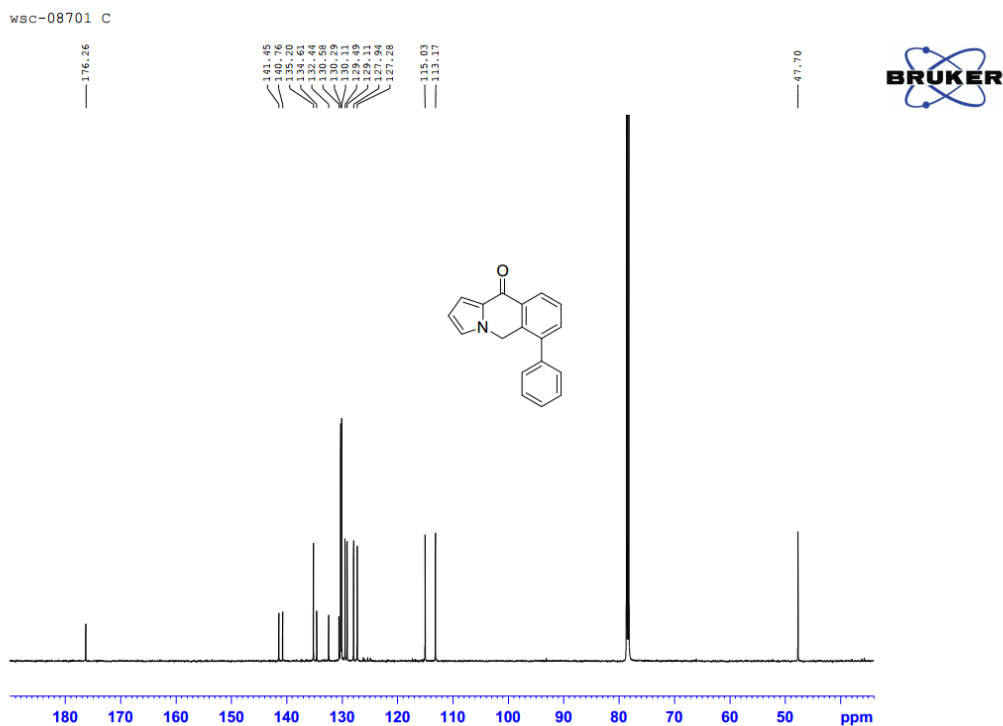

## NMR of compound 3k

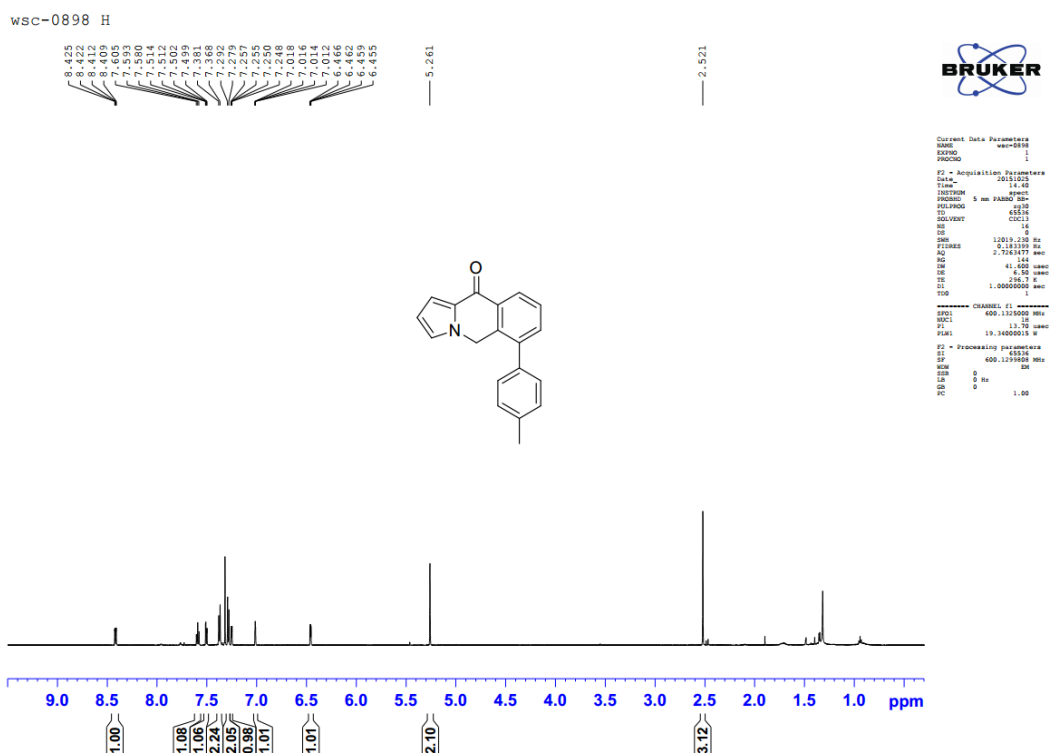



wsc-0898 C

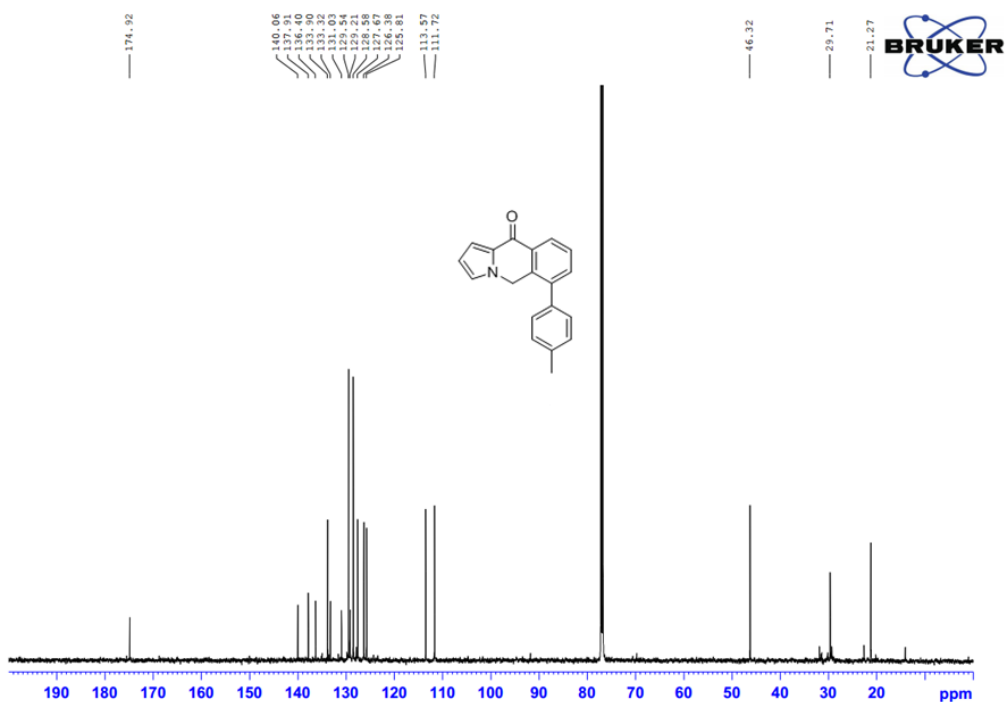

## NMR of compound 31

wsc-cc-31

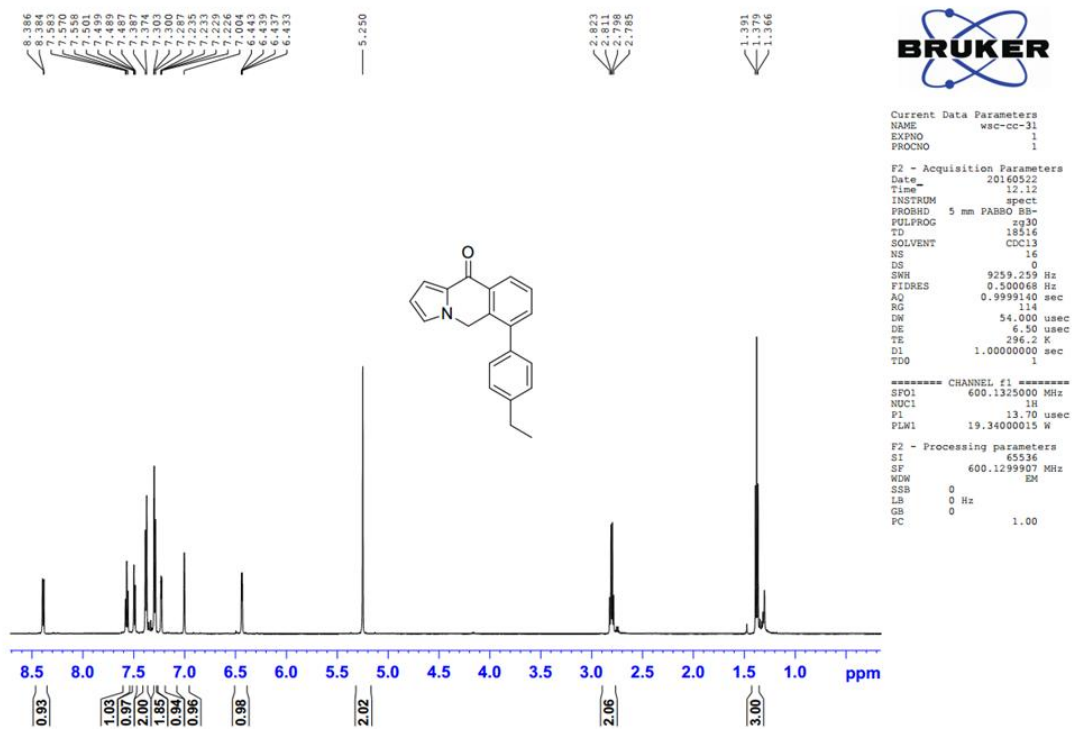

wsc-cc-31

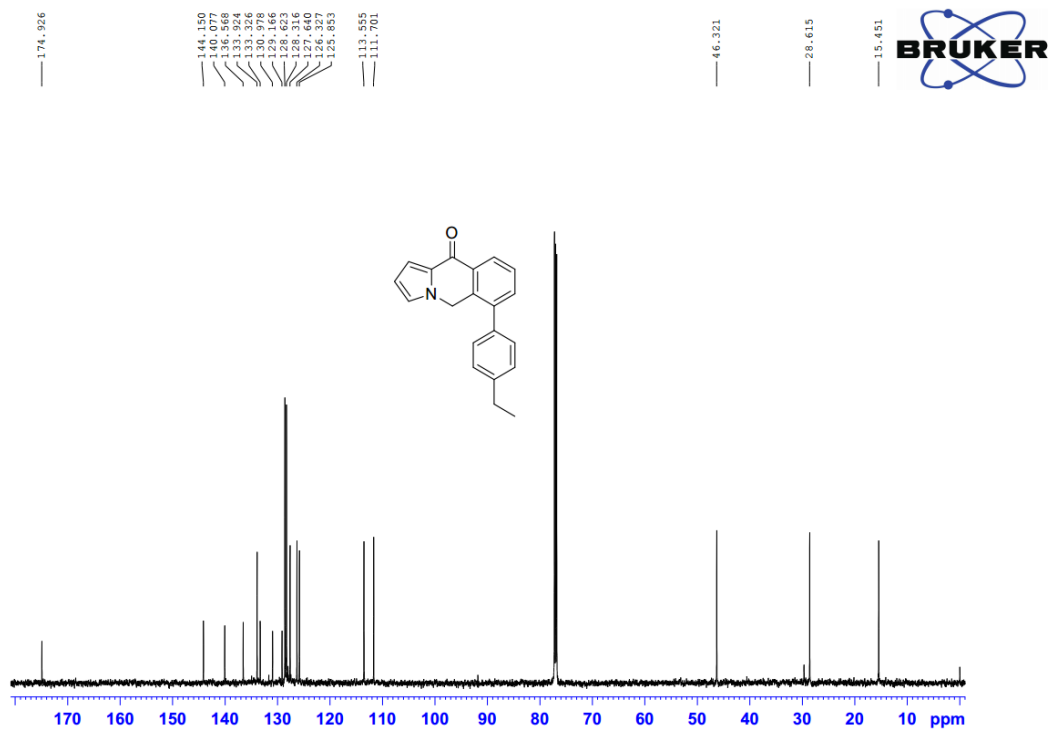

## NMR of compound 3m

wsc-0922 H

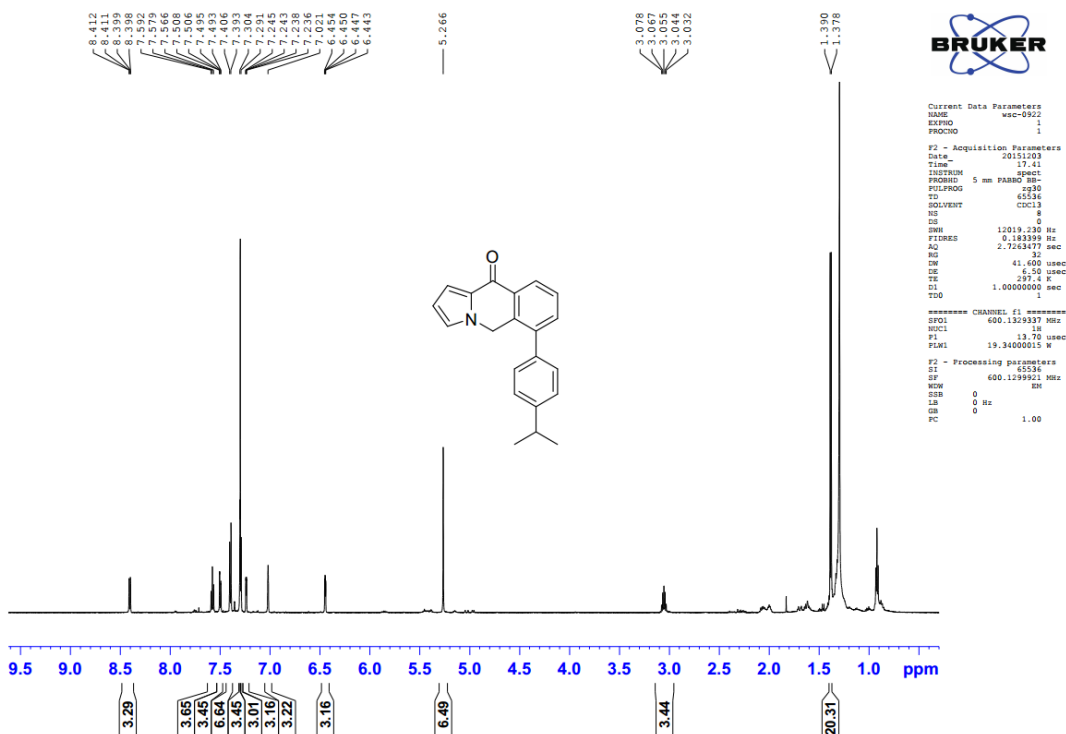

WSC-CC-3m C

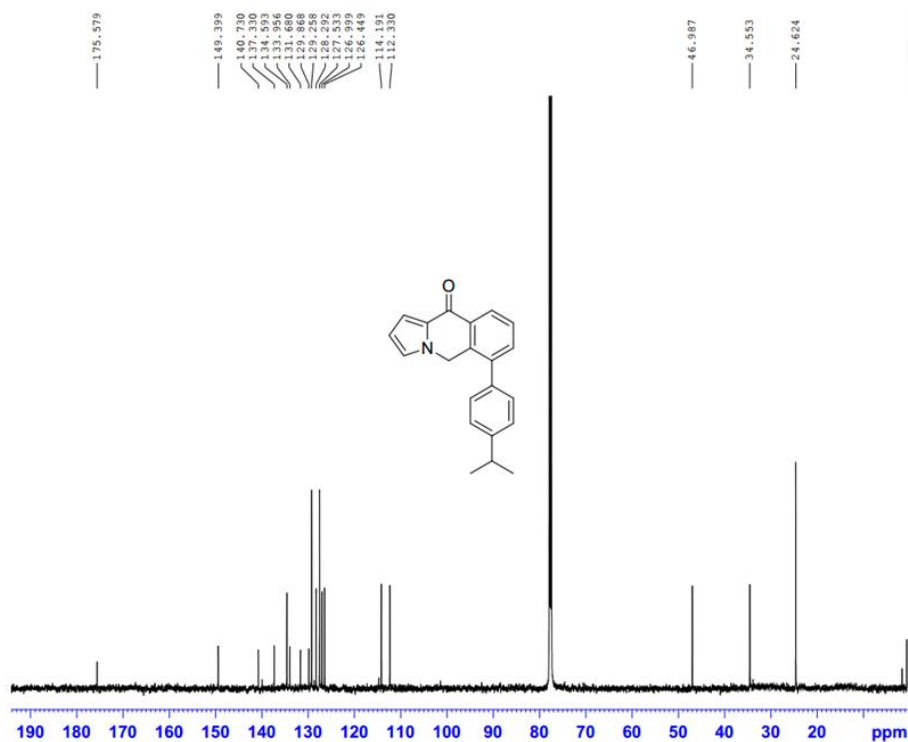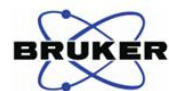

## NMR of compound 3n

WSC-0923 H

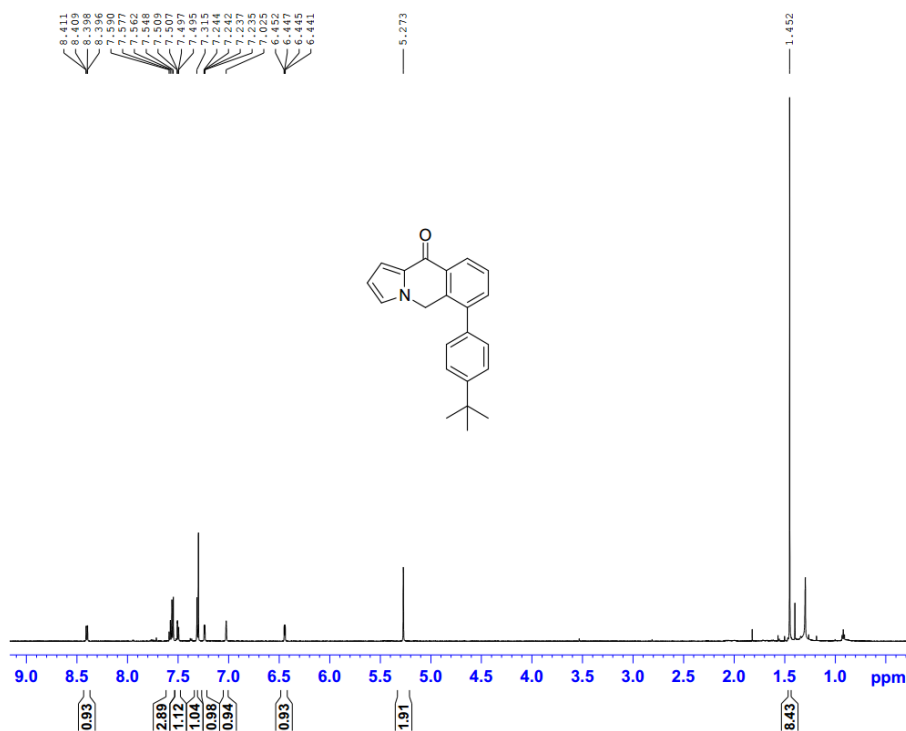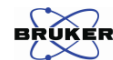

Current Data Parameters  
NAME WSC-0923  
EXPNO 1  
PROCNO 1  
F2 - Acquisition Parameters  
Date\_ 20151023  
Time 17.45  
INSTRUM spect  
PROBHD 5 mm PABBO 2H  
PULPROG zgpg30  
PC 45.54  
SOLVENT CDCl3  
NS 8  
DS 0  
SWH 12019.230 Hz  
FIDRES 0.181399 Hz  
AQ 2.726177 sec  
RG 32  
RM 41.600 usec  
DE 6.50 usec  
TE 297.2 K  
D1 1.00000000 sec  
TD 1  
===== CHANNEL f1 =====  
NUC1 13C  
P1 12.19 usec  
PLM1 19.34000015 W  
F2 - Processing parameters  
SI 65536  
SF 400.139921 MHz  
WDW EM  
SSB 0  
LA 0 Hz  
GB 0  
PC 1.00

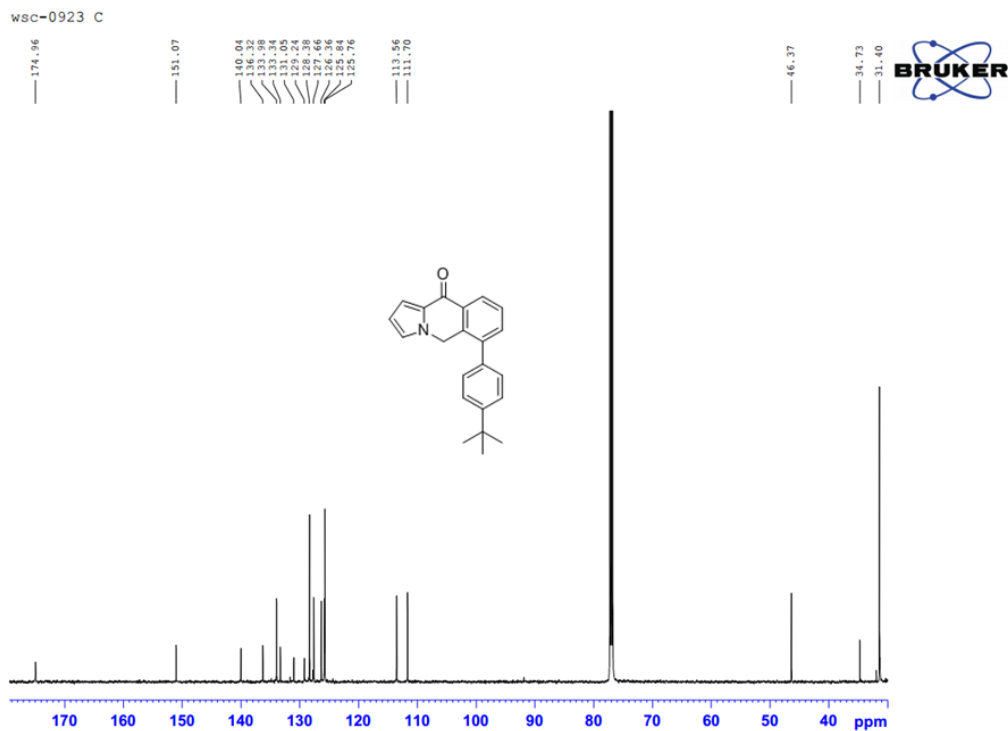

## NMR of compound **3o**

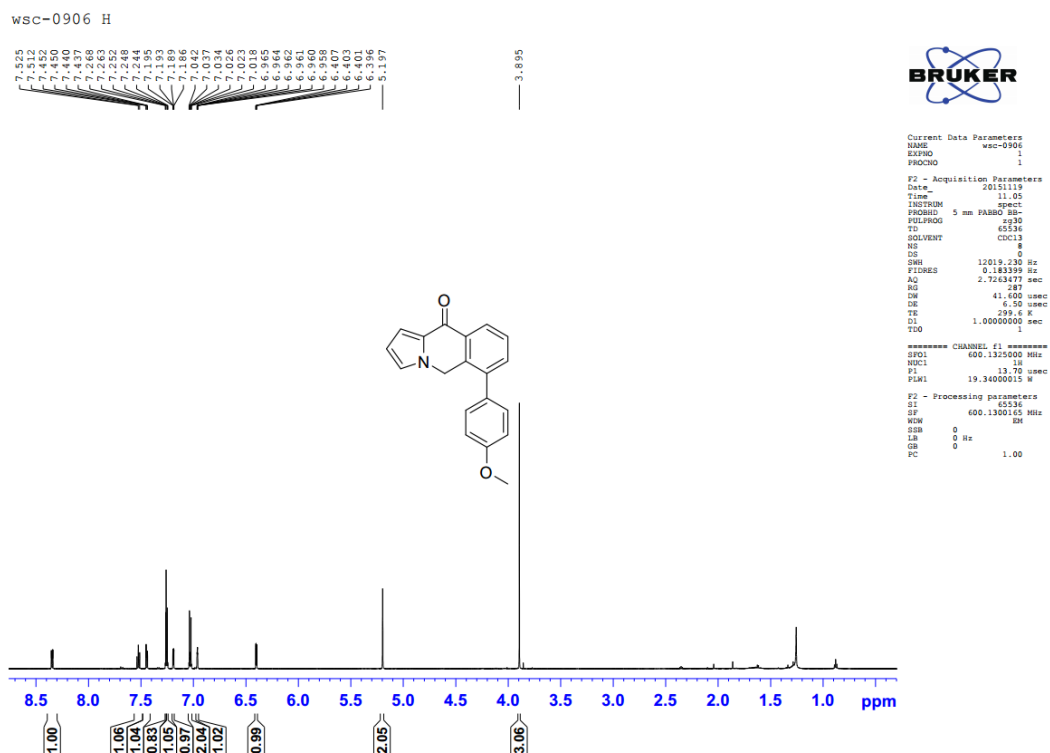

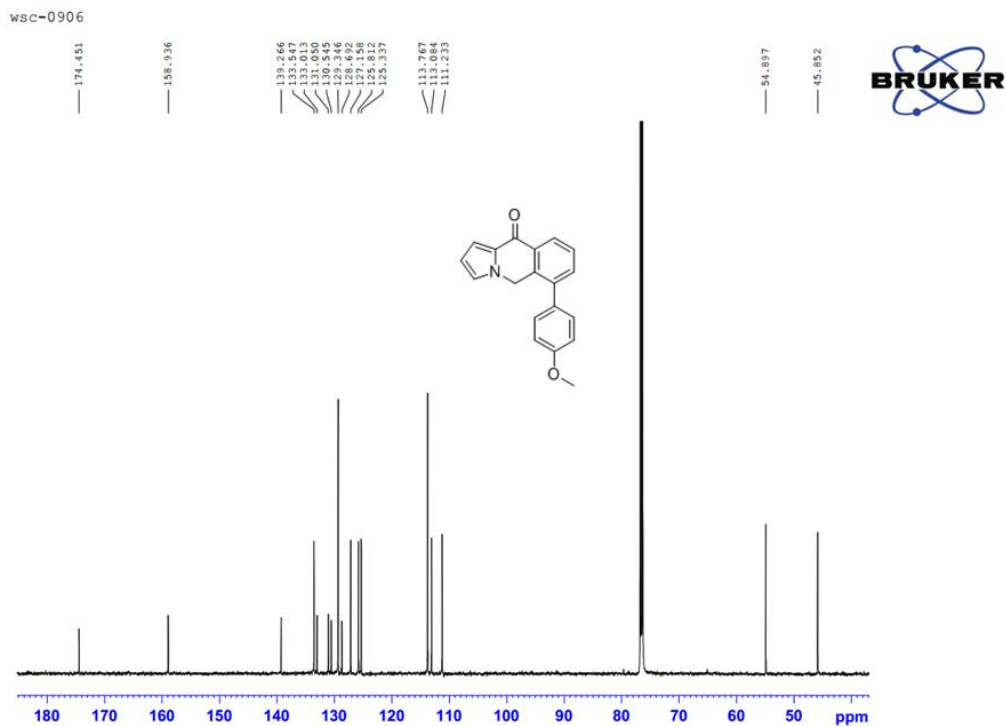

## NMR of compound 3p

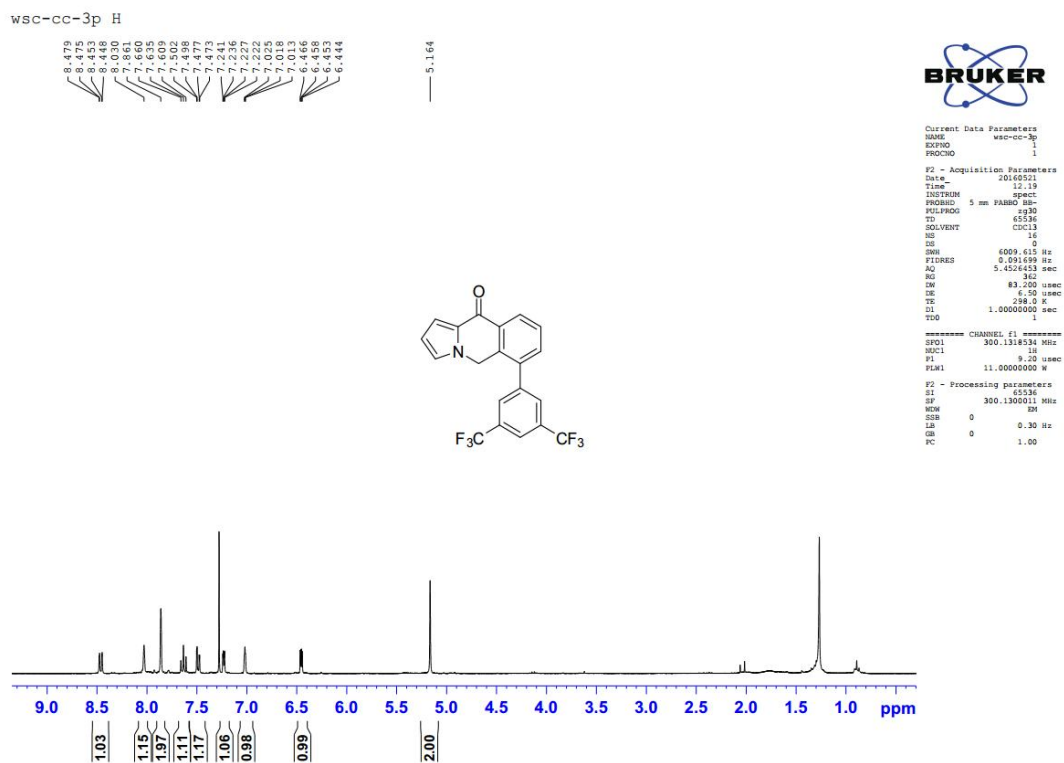

wsc-0899

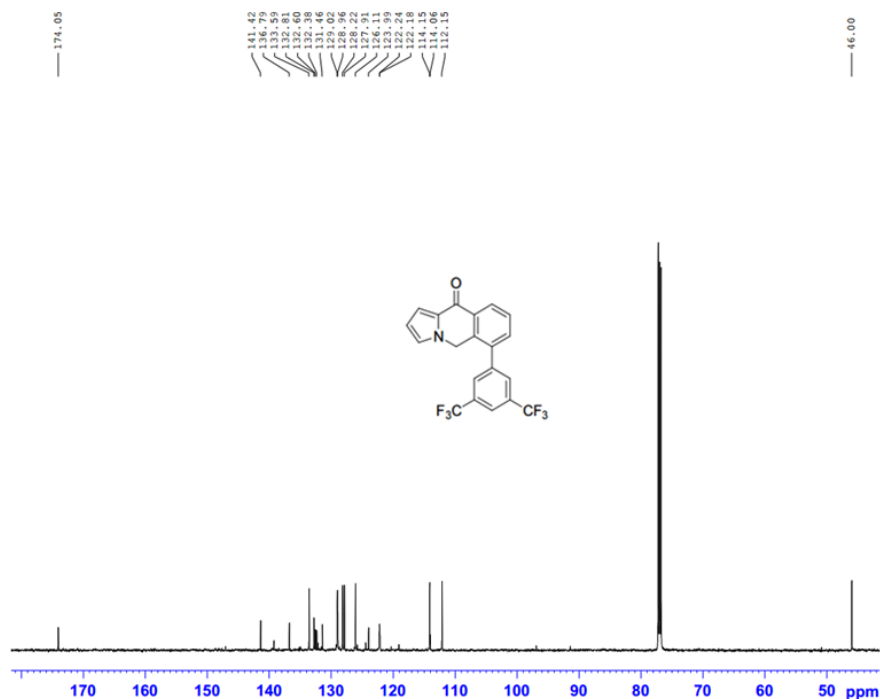

## <sup>19</sup>F NMR of compound 3p

wsc-cc-3p F

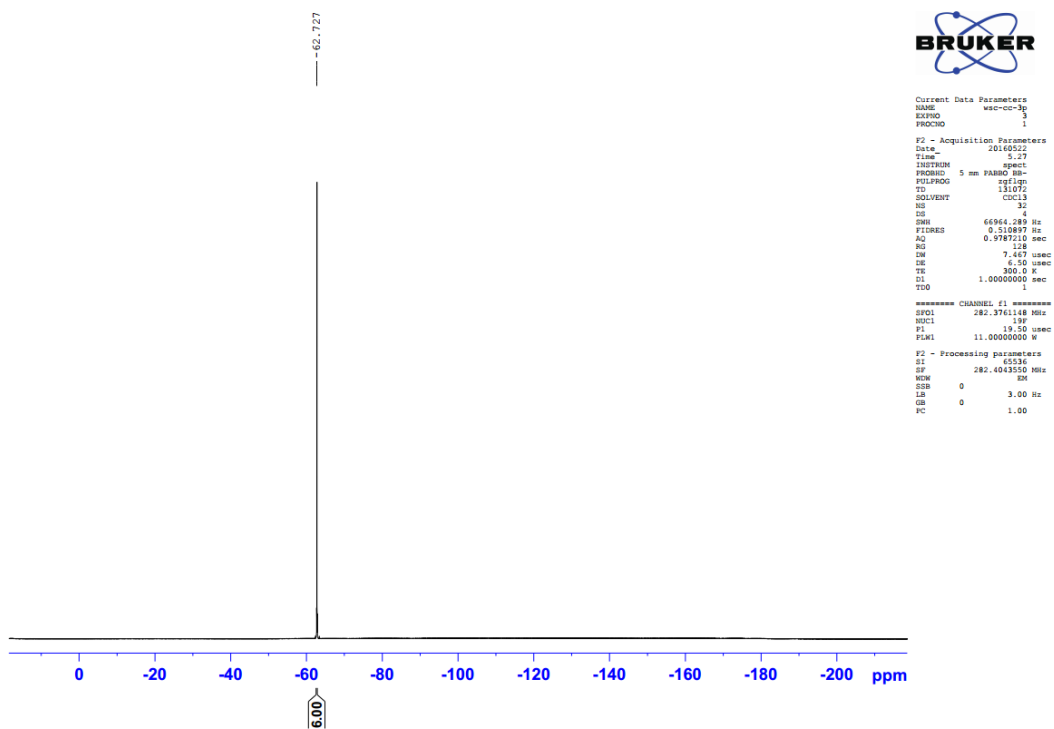

## NMR of compound 3q

wsc-cc-3q-H

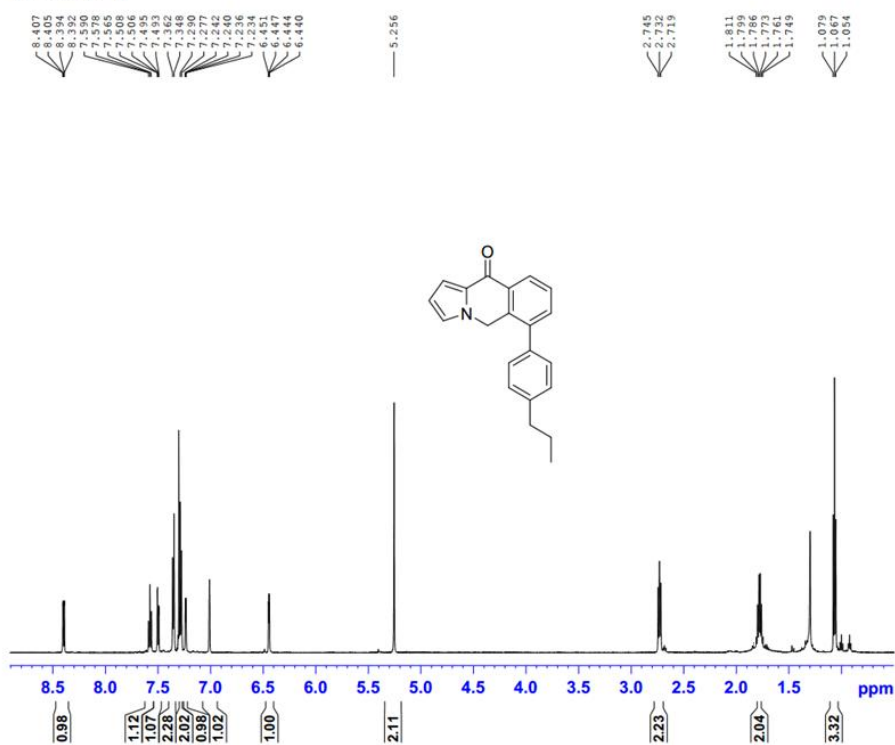

**BRUKER**

Current Data Parameters  
NAME wsc-cc-3q  
EXPNO 1  
PROCNO 1

F2 - Acquisition Parameters  
Date\_ 20160522  
Time 12.24  
INSTRUM spect  
PROBHD 5 mm PABBO BB-  
PULPROG zg30  
TD 18516  
SOLVENT CDCl3  
NS 16  
DS 0  
SWH 9259.259 Hz  
FIDRES 0.500068 Hz  
AQ 0.9999140 sec  
RG 228  
SW 54.000 usec  
DE 6.50 usec  
TE 296.6 K  
D1 1.00000000 sec  
TD0 1

----- CHANNEL f1 -----  
SFO1 600.1325000 MHz  
NUC1 1H  
P1 13.70 usec  
PLW1 19.34000015 W

F2 - Processing parameters  
SI 65536  
SF 600.1299907 MHz  
WDW EM  
SSB 0  
LB 0 Hz  
GB 0  
PC 1.00

wsc-cc-3q-C

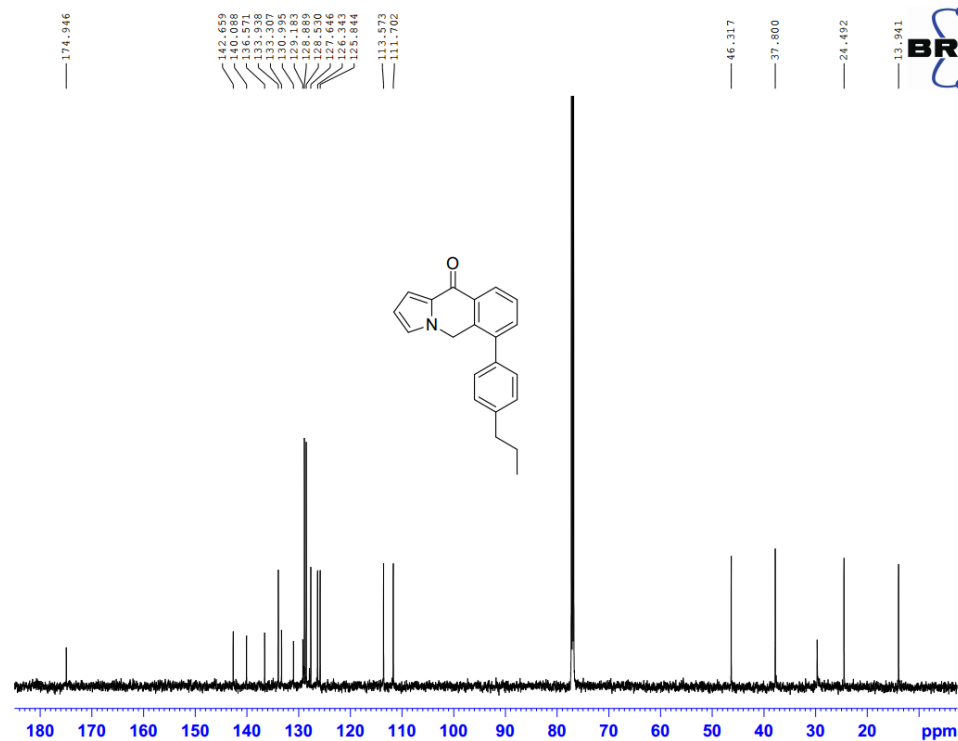

**BRUKER**

NMR of compound 3r

wsc-0947 H

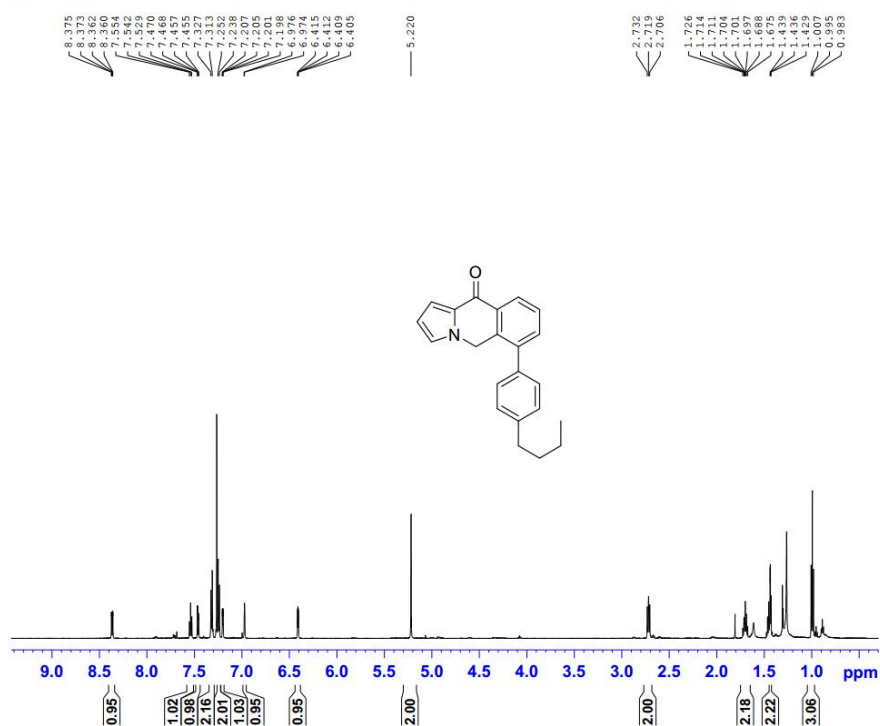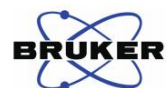

Current Data Parameters  
 NAME wsc-0947  
 EXPNO 1  
 PROCNO 1  
 P2 - Acquisition Parameters  
 Date\_ 20160105  
 Time 10.21  
 INSTRUM spect  
 PROBRD 5 mm PABBO BB-  
 PULPROG zg30  
 TD 65536  
 SOLVENT CDCl3  
 NS 16  
 DS 0  
 SWH 12019.230 Hz  
 FIDRES 0.183399 Hz  
 AQ 2.7263477 sec  
 RG 144  
 DW 41.400 usec  
 DE 6.50 usec  
 TE 300.2 K  
 D1 1.00000000 sec  
 T20 1  
 ===== CHANNEL f1 =====  
 SFO1 600.1325000 MHz  
 NUC1 1H  
 P1 13.70 usec  
 PLW1 19.34000015 W  
 P2 - Processing parameters  
 SI 65536  
 SF 600.1300121 MHz  
 WHW 8M  
 SSB 0  
 LB 0 Hz  
 GB 0  
 PC 1.00

wsc-0947 C

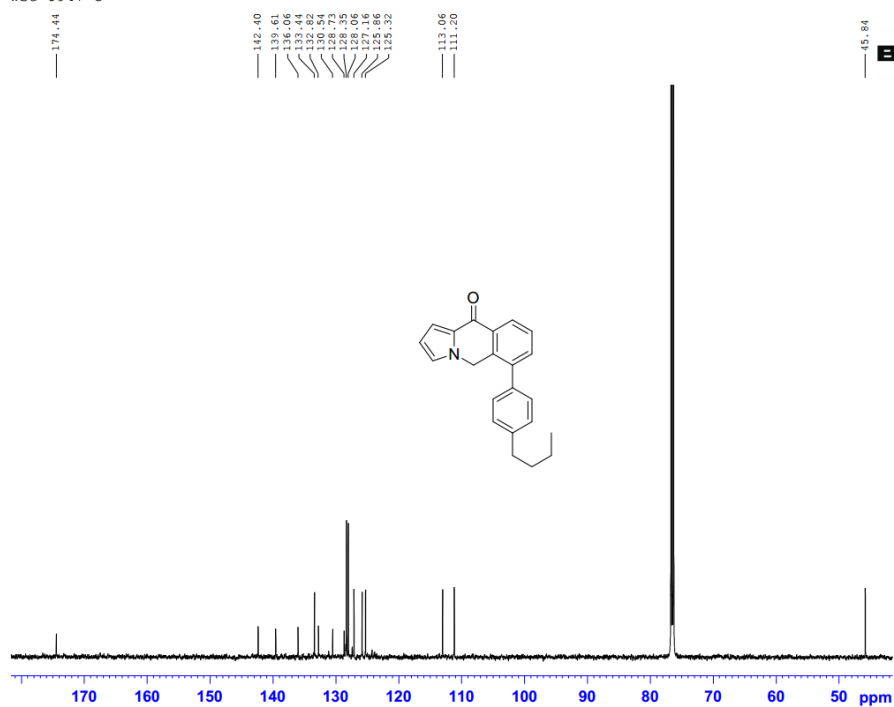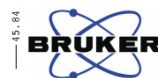

NMR of compound 3s



wsc-0949

7.553  
7.552  
7.528  
7.527  
7.526  
7.469  
7.458  
7.457  
7.320  
7.313  
7.306  
7.249  
7.242  
7.236  
7.205  
7.200  
7.198  
7.196  
6.972  
6.971  
6.969  
6.968  
6.415  
6.413  
6.411  
6.408  
6.406  
6.404  
5.219

2.723  
2.722  
2.696  
1.742  
1.740  
1.736  
1.726  
1.717  
1.712  
1.710  
1.704  
1.695  
1.692  
1.437  
1.432  
1.422  
1.416  
1.410  
1.398  
1.392  
1.383  
0.961

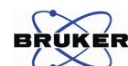

Current Data Parameters  
NAME wsc-0949  
EXPNO 1  
PROCNO 1  
F2 - Acquisition Parameters  
Date\_ 20160105  
Time\_ 19.07  
INSTRUM spect  
PROBHD 5 mm PABBO BB-  
PULPROG zgpg30  
TD 65536  
SOLVENT CDCl3  
NS 16  
DS 0  
SWH 12019.230 Hz  
FIDRES 0.183399 Hz  
AQ 2.7263477 sec  
RG 161  
DM 41.600 usec  
DE 6.50 usec  
TE 300.0 K  
D1 1.00000000 sec  
TD0 1  
===== CHANNEL f1 =====  
SFO1 600.132000 MHz  
NUC1 1H  
P1 13.70 usec  
PLW1 19.34000015 W  
F2 - Processing parameters  
SI 65536  
SF 600.1300121 MHz  
WDW EM  
SSB 0  
LB 0 Hz  
GB 0  
PC 1.00

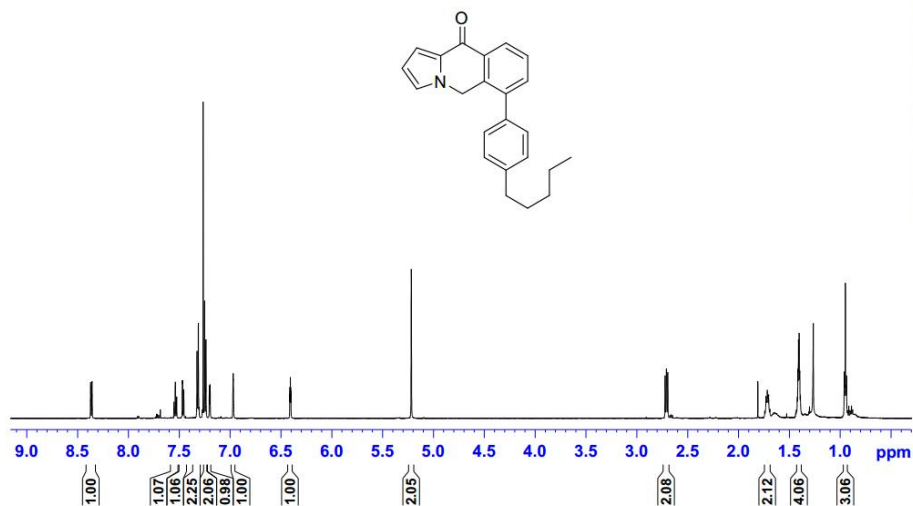

wsc-0949 C

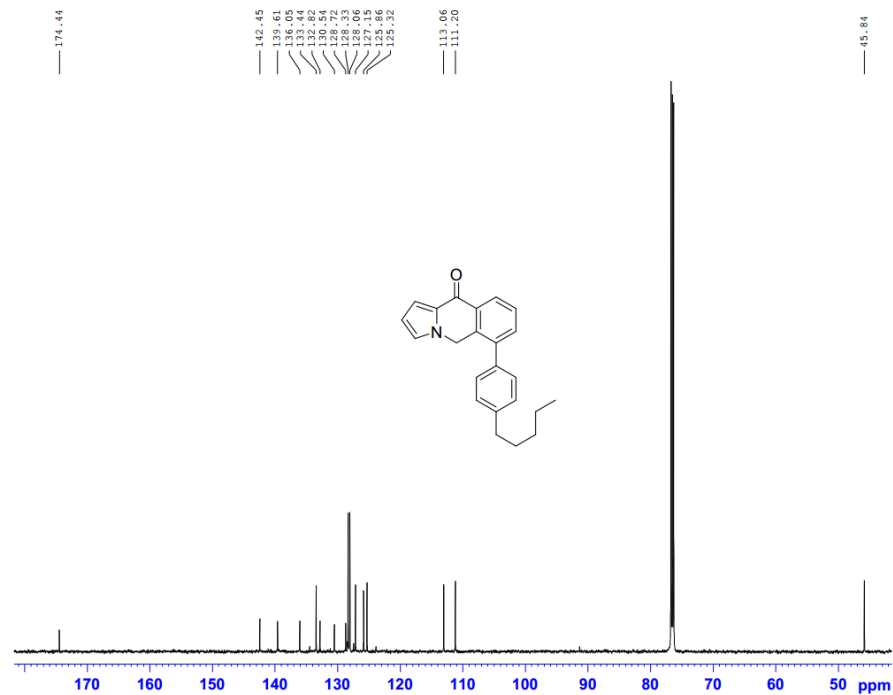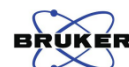

NMR of compound **3t**

wsc-0950 H

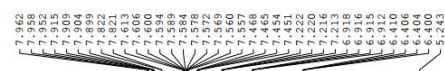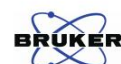

Current Data Parameters  
NAME: wsc-0950  
SIMP: 1  
PROCNO: 1

F2 - Acquisition Parameters  
Date\_: 20160125  
Time\_: 10.55  
INSTRUM: spect  
PROBHD: 5 mm PABBO 30-  
PULPROG: zgpg30  
TD: 65536  
SOLVENT: CDCl3  
NS: 16  
DS: 4  
SWH: 12019.230 Hz  
FIDRES: 0.153399 Hz  
AQ: 2.7283477 sec  
RG: 281  
SR: 41.400 usec  
DE: 6.50 usec  
TE: 300.2 K  
D1: 1.00000000 sec  
YD0: 1

\*\*\*\*\* CHANNEL f1 \*\*\*\*\*  
NUC1: 13C  
P1: 13.70 usec  
PL1: 19.34000013 V

F2 - Processing parameters  
SI: 65536  
SF: 600.1300121 MHz  
WDW: EM  
SSB: 0  
LB: 0 Hz  
GB: 0  
PC: 1.00

wsc-0950 C

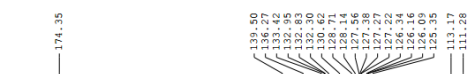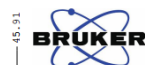

## Top1 and Top2 Inhibitory Activity Assay

## Top1 Inhibitory Activity Assay

DNA relaxation assays were employed according to the procedure described in previous studies<sup>1</sup>. The reaction mixture contained 35 mM Tris-HCl (pH 8.0), 72 mM KCl, 5 mM MgCl<sub>2</sub>, 5 mM dithiothreitol, 5 mM spermidine, 0.1% bovine serum albumin (BSA), pBR322 plasmid DNA (0.25 µg), the indicated drug concentrations (1% DMSO), and 1 unit of Top1 (TaKaRa Biotechnology Co., Ltd., Dalian) in a final volume of 20 µL. Reaction mixtures were incubated for 15 min at 37 °C and stopped by addition of 2 µL of 10× loading buffer (0.9% sodium dodecyl sulfate (SDS), 0.05% bromophenol blue, and 50% glycerol). Electrophoresis was carried out in a 0.8% agarose gel in TAE (Tris-acetate-EDTA) at 8 V/cm for 1 h. Gels were stained with ethidium bromide (0.5 µg/mL) for 60 min. The DNA band was visualized over UV light and photographed with Gel Doc Ez imager (Bio-Rad Laboratories Ltd.)

### **Top2 Inhibitory Activity Assay**

DNA Top2 $\alpha$  inhibitory activity of the compounds was measured using Topoisomerase II Drug Screening Kit (TopoGEN, Inc.). The reaction mixture contained 50 mM Tris-HCl (pH 8.0), 150 mM NaCl, 10 mM MgCl<sub>2</sub>, 5 mM dithiothreitol, 30 µg/mL bovine serum albumin (BSA), 2 mM ATP, pBR322 plasmid DNA (0.25), the indicated drug concentrations (1% DMSO), and 0.75 unit of Top2 $\alpha$  (TopoGEN, Inc.) in a final volume of 20 µL. Reaction mixtures were incubated for 30 min at 37°C and stopped by addition of 2 µL of 10% SDS. After that, 2 µL of 10× gel loading buffer (0.25% bromophenol blue, 50% glycerol) was added. The reaction products were analyzed on 1% agarose gel at 8 V/cm for 1 h with TAE (Tris acetate-EDTA) as the running buffer. Gels were stained with ethidium bromide (0.5µg/mL) for 60 min. The DNA band was visualized over UV light and photographed with Gel Doc Ez imager (Bio-Rad Laboratories Ltd.).

### **Biological assays**

#### **Cell cultures**

Hela cells and HepG2 cells were cultured in DMEM medium (Hyclone), HCT116 cells were cultured in McCoy's 5A medium (Gibco) and A549 cells were cultured in RPMI 1640 medium (Gibco) with 10% fetal calf serum (Gibco), 100 U/ml penicillin

and 100 µg/ml streptomycin (Invitrogen-Gibco, Karlsruhe, Germany). Cells were maintained in a humidified incubator with 5% CO<sub>2</sub> at 37 °C.

#### ***In vitro* cytotoxicity assay**

5×10<sup>3</sup> cells were seeded on a 96-well culture transwell apparatus (Costar, Cambridge, MA, USA) and cultured in DMEM medium, RPMI 1640 medium or McCoy's 5A medium with 10% (v/v) fetal bovine serum (FBS), respectively. The tested compounds were diluted to different final concentration and the cells were incubated for 48 h in a CO<sub>2</sub> incubator at 37 °C. Above loading media were removed, and the cells were fed new medium, followed by 10 µL of Cell Counting Kit-8 (CCK-8) per 100 µL of medium and incubated for 1 h. The cell viability was then assessed by Cell-Counting Kit-8 assay (Dojindo Laboratories, Japan) following the manufacturers' protocol. The absorbance of each well was monitored by a spectrophotometer (Tecan, Switzerland) at 450 nm.

#### **References**

1. G. Dong, C. Sheng, S. Wang, Z. Miao, J. Yao and W. Zhang, *J. Med. Chem.*, 2010, **53**, 7521.
